# Supplementary material for: Semi-Supervised Prediction of SH2-Peptide Interactions from Imbalanced High-Throughput Data
Source: PLoS One. 2013 May 17;8(5):e62732. doi: 10.1371/journal.pone.0062732 (PMC3656881; doi:10.1371/journal.pone.0062732)
Supplement: File S2 — Term-centric singular enrichment analysis using DAVID tool. Term-centric singular enrichment analysis which identify enriched annotation biological terms associated with the predicted proteins. The smaller p-values indicate higher enrichment. (XLSX) [file pone.0062732.s008.xlsx]

## Sheet: Sheet1
Sheet1 contains all the top 10 term-centric enrichment interactions for each SH2 domains predicted by the SVM and Sheet2 contains all the top 10 term-centric enrichment interactions for each SH2 domains predicted by the SVM but negatively predicted by the SMALI.
Genome-wide prediction for 50 human SH2 domains. Top 50 predictions for each SH2 domains are used for DAVID analysis. DAVID functional annotation chart which identify enriched annotation terms associated with predicted proteins are reported. the smaller P-values, the more significant they are. For the cellular localization of E105251 SH2 domain, there is no annotation reported in GO-term database…
SVM-top predictions (positive data)
SH2 Domains	Category	Term	P-value	Proteins
ABL1	UP_SEQ_FEATURE	region of interest:Divergent helix-loop-helix motif	1.4122545618989693E-5	P56945, O43281, Q14511
ABL1	UP_SEQ_FEATURE	zinc finger region:C5-type	2.8205684593013306E-5	Q9UH73, Q9H4W6, Q9HAK2
ABL1	INTERPRO	IPR018350:Transcription factor COE, conserved site	3.0311852120242797E-5	Q9UH73, Q9H4W6, Q9HAK2
ABL1	INTERPRO	IPR003523:Transcription factor COE	3.0311852120242797E-5	Q9UH73, Q9H4W6, Q9HAK2
ABL1	PIR_SUPERFAMILY	PIRSF018314:transcription factor, collier type	3.740330371390662E-5	Q9UH73, Q9H4W6, Q9HAK2
ABL1	SP_PIR_KEYWORDS	phosphoprotein	3.82477708182251E-5	P46940, Q12923, Q8WZ42, Q9UQB3, P49815, P20618, P56945, Q00610, P42345, Q99497, Q12769, P27695, Q6IBW4, Q86VI3, Q96CW6, P18669, Q8N4C8, Q15019, P00519, P15941, Q14511, Q9NP74, Q8IZD4, O95487, Q13480, Q5EBL8, Q9UJM3, Q8IX90, O43281, Q13627
ABL1	UP_SEQ_FEATURE	domain:IPT/TIG	2.0977880945454477E-4	Q9UH73, Q9H4W6, Q9HAK2
ABL1	GOTERM_CC_FAT	GO:0005856~cytoskeleton	3.1413163260283306E-4	P46940, Q12923, P27695, Q8IX90, Q8WZ42, Q15019, P49815, Q13643, P00519, Q14511, P09327
ABL1	GOTERM_MF_FAT	GO:0030695~GTPase regulator activity	3.326365405718474E-4	P46940, Q86VI3, Q9UJM3, Q15283, Q8N4C8, Q8WZ42, P49815
ABL1	SP_PIR_KEYWORDS	cytoplasm	3.4156694207003463E-4	Q12923, Q15283, Q8WZ42, Q15019, P49815, P00519, Q14511, Q9NP74, P15941, P09327, Q8IZD4, P20618, O95487, P56945, Q9UJM3, Q9NUP1, Q8IX90, Q99497
ABL2	GOTERM_CC_FAT	GO:0005829~cytosol	2.417393659867791E-13	Q8WZ42, P06732, P49815, P35222, Q06520, P20618, P55196, P53621, P42684, P49792, Q9UJU6, Q07866, P68104, P41279, Q8TCD5, Q9Y490, Q9H1K1, Q9UHI6, P23921, P05412, Q5EBL8, P36871, P60891, Q8NFP9, Q9NXJ5
ABL2	SP_PIR_KEYWORDS	cytoplasm	5.6389450528542185E-11	P20929, Q8WZ42, P06732, P49815, P16157, Q12792, Q8WWN8, P35222, Q06520, P20618, P53621, P42684, O75161, Q9UJU6, P41279, P68104, Q8TCD5, Q9Y490, Q9H1K1, Q9UHI6, Q99704, Q8IZD4, P23921, Q9NUP1, P36871, Q8NFP9, Q9NXJ5, P60900, P49720, P04792
ABL2	SP_PIR_KEYWORDS	phosphoprotein	2.5673010552672325E-9	Q8NF50, Q8WZ42, Q8NG31, P49815, P16157, Q12792, Q8WWN8, P35222, P20618, P55196, P53621, P42684, P49792, P11217, P13647, Q00610, Q07866, Q9BRR9, Q9UJU6, P41279, P68104, Q13131, Q8TCD5, Q9Y490, P46020, Q9H1K1, Q9UHI6, P05067, Q99704, P52948, Q93009, Q8IZD4,
ABL2	SP_PIR_KEYWORDS	cytoskeleton	3.7304815639846506E-6	P20929, Q9Y490, P42684, P13647, O75161, P16157, Q12792, Q8WWN8, P35222, P04792, Q9UJU6
ABL2	GOTERM_CC_FAT	GO:0005856~cytoskeleton	2.3826803937717018E-5	P20929, Q9Y490, Q8WZ42, Q9UHI6, P16157, P49815, P05067, Q12792, Q8WWN8, P35222, P42684, P13647, O75161, P04792, Q9UJU6, Q07866
ABL2	GOTERM_CC_FAT	GO:0043228~non-membrane-bounded organelle	9.845041819429363E-5	P20929, Q9Y490, Q8WZ42, Q8NG31, Q9UHI6, P16157, P49815, P05067, Q12792, P35222, Q8WWN8, P52948, Q9BZD4, P05412, P42684, Q8N1I0, P13647, O75161, P04792, Q07866, Q9UJU6
ABL2	GOTERM_CC_FAT	GO:0043232~intracellular non-membrane-bounded organelle	9.845041819429363E-5	P20929, Q9Y490, Q8WZ42, Q8NG31, Q9UHI6, P16157, P49815, P05067, Q12792, P35222, Q8WWN8, P52948, Q9BZD4, P05412, P42684, Q8N1I0, P13647, O75161, P04792, Q07866, Q9UJU6
ABL2	SP_PIR_KEYWORDS	acetylation	1.6539814171398102E-4	P68104, Q9Y490, Q99704, Q12792, P52948, Q93009, Q8IZD4, P20618, P23921, P36871, P11217, P60891, P49792, Q00610, P60900, P49720, P04792, Q9UJU6
ABL2	GOTERM_MF_FAT	GO:0005198~structural molecule activity	2.7207203856053025E-4	P20929, P53621, Q9Y490, Q9H1K1, Q8WZ42, P13647, O75161, P16157, Q00610, P52948
ABL2	GOTERM_CC_FAT	GO:0030017~sarcomere	3.1881088320739827E-4	P20929, Q8WZ42, P16157, P35222, P04792
APS	UP_SEQ_FEATURE	domain:C2	1.2838261671128011E-9	Q5VWQ8, Q04759, Q9UJF2, P17252, P05129, Q96PV0, P05771, Q02156
APS	SP_PIR_KEYWORDS	phosphoprotein	2.5673010552672325E-9	Q13045, Q13043, Q8IXJ6, P32927, O14492, Q9UP95, P17252, P06733, P08865, P35568, O95954, Q02156, P12814, P42681, Q86WV1, Q02763, O15530, P32239, Q9UJF2, Q9BZI7, P50851, P09104, P78324, P52298, Q9UGN4, P05129, Q14008, P05771, Q86W92, O75369, Q13813, Q9Y4H2,
APS	SP_PIR_KEYWORDS	duplication	5.368487830099894E-9	P12814, P17927, Q02763, Q04759, P32927, P17252, P03951, P05771, P02549, Q02156
APS	UP_SEQ_FEATURE	domain:PH	7.946086887678384E-9	Q9Y4H2, Q86WV1, Q5VWQ8, O15530, O14492, Q9UJF2, O75563, Q96PV0, Q8TER5, P35568
APS	INTERPRO	IPR015745:Protein kinase C	8.232389353789966E-9	Q04759, P17252, P05129, P05771, Q02156
APS	KEGG_PATHWAY	hsa04960:Aldosterone-regulated sodium reabsorption	4.9088894691482404E-8	Q9Y4H2, O15530, P17252, P05129, P05771, O00459, P35568
APS	UP_SEQ_FEATURE	active site:Proton acceptor	7.198767205755393E-8	Q13043, Q8IXJ6, P17252, P06733, P05129, P05771, Q02156, P42681, Q02763, Q04759, O15530, P13929, P09104
APS	GOTERM_MF_FAT	GO:0004697~protein kinase C activity	1.3864336462424682E-7	Q04759, P17252, P05129, P05771, Q02156
APS	UP_SEQ_FEATURE	zinc finger region:Phorbol-ester/DAG-type 2	2.695203354655405E-7	Q04759, P17252, P05129, P05771, Q02156
APS	UP_SEQ_FEATURE	zinc finger region:Phorbol-ester/DAG-type 1	2.695203354655405E-7	Q04759, P17252, P05129, P05771, Q02156
BCAR3	SP_PIR_KEYWORDS	phosphoprotein	3.857662284035782E-9	O75815, Q8WVD3, Q7Z3F1, Q8TD08, Q9Y230, Q9Y6W5, Q5TCQ9, P35228, Q8TEA7, Q9H4M9, Q9UJX2, O60292, P08758, Q9HCM2, Q8N5T2, Q92990, Q9NPH3, Q9NUY8, Q9Y5X1, Q8IZP0, Q15111, Q92834, Q8WV28, Q9UPU7, O75900, Q9Y5W8, O95196, O15211, P09211, Q9GZY6, Q6S5L8, Q9P2F8,
BCAR3	GOTERM_MF_FAT	GO:0030695~GTPase regulator activity	2.3723972896477406E-8	O75815, Q8N5T2, Q0IIM8, O15211, Q9P2F8, Q9NUY8, Q2M2D7, Q92834, Q8TEA7, Q9UPU7, O60292, Q96DR7
BCAR3	GOTERM_MF_FAT	GO:0060589~nucleoside-triphosphatase regulator activity	2.9754643267468698E-8	O75815, Q8N5T2, Q0IIM8, O15211, Q9P2F8, Q9NUY8, Q2M2D7, Q92834, Q8TEA7, Q9UPU7, O60292, Q96DR7
BCAR3	UP_SEQ_FEATURE	domain:Rab-GAP TBC	5.8027897766708E-8	Q8N5T2, Q0IIM8, Q9NUY8, Q2M2D7, Q8TEA7, Q9UPU7
BCAR3	GOTERM_BP_FAT	GO:0051056~regulation of small GTPase mediated signal transduction	9.398171231999866E-8	Q8N5T2, Q0IIM8, O15211, Q9P2F8, Q9NUY8, Q2M2D7, Q8TEA7, Q9UPU7, O60292, Q96DR7
BCAR3	GOTERM_MF_FAT	GO:0005097~Rab GTPase activator activity	3.3299296717769744E-7	Q8N5T2, Q0IIM8, Q9NUY8, Q2M2D7, Q8TEA7, Q9UPU7
BCAR3	GOTERM_BP_FAT	GO:0032313~regulation of Rab GTPase activity	3.991084224557196E-7	Q8N5T2, Q0IIM8, Q9NUY8, Q2M2D7, Q8TEA7, Q9UPU7
BCAR3	GOTERM_BP_FAT	GO:0032483~regulation of Rab protein signal transduction	3.991084224557196E-7	Q8N5T2, Q0IIM8, Q9NUY8, Q2M2D7, Q8TEA7, Q9UPU7
BCAR3	GOTERM_MF_FAT	GO:0005096~GTPase activator activity	4.225933980602927E-6	Q8N5T2, Q0IIM8, Q9P2F8, Q9NUY8, Q2M2D7, Q8TEA7, Q9UPU7, O60292
BCAR3	INTERPRO	IPR000195:RabGAP/TBC	4.412971227906547E-6	Q8N5T2, Q0IIM8, Q9NUY8, Q8TEA7, Q9UPU7
BLK	GOTERM_CC_FAT	GO:0005886~plasma membrane	5.3989639759371215E-14	Q9UGI8, P29317, O14763, P61026, Q8WUD1, P21462, P16157, P18433, Q5SZK8, P61106, Q8NGX2, Q9UKW4, P56945, P55283, P55011, Q460N5, P09104, P04264, P50281, P00813, Q9NYI0, Q9Y6R1, Q9UQ49, Q12913, Q6IF00, Q92736, P21854, P30926, O43451, P15498, Q9Y666, Q7KZI7,
BLK	SP_PIR_KEYWORDS	cell membrane	1.350034105259092E-7	Q9NYI0, Q9Y6R1, P61026, Q8WUD1, Q6IF00, P21462, Q5SZK8, P61106, Q8NGX2, P30926, O43451, O75106, P55283, Q7KZI7, Q96K78, P09104, Q96R27, P04264, Q9Y487, P00813, Q9GZK7
BLK	SP_PIR_KEYWORDS	membrane	1.3525656081099585E-7	O14763, P29317, O75096, P61026, Q8WUD1, P21462, P16157, P18433, Q5SZK8, P61106, Q8NGX2, O75106, P55283, P55011, P09104, P04264, P50281, P00813, Q9NYI0, Q9Y6R1, Q9UQ49, Q12913, Q6IF00, Q92736, P21854, P30926, O43451, Q9Y666, Q7KZI7, Q96K78, Q96R27, Q9NYJ8,
BLK	GOTERM_CC_FAT	GO:0044459~plasma membrane part	5.214594225292729E-6	Q9UGI8, Q9NYI0, P29317, Q9Y6R1, P61026, Q12913, Q9UQ49, Q8WUD1, P16157, P18433, Q5SZK8, P21854, P61106, P56945, P30926, Q9Y666, P55283, P55011, P50281, Q9UHW9, P00813
BLK	UP_SEQ_FEATURE	topological domain:Cytoplasmic	9.074394583201242E-6	O14763, P29317, O75096, Q9Y6R1, Q12913, Q6IF00, P21462, P18433, Q92736, Q5SZK8, P21854, Q8NGX2, P30926, O43451, Q9Y666, P55283, P55011, Q96K78, Q96R27, P50281, Q9Y487, Q9UHW9, Q9GZK7
BLK	SP_PIR_KEYWORDS	phosphoprotein	2.5252034271783397E-5	Q9UGI8, P29317, O75096, Q15208, P21462, P16157, P18433, Q9H6S3, P42681, P61106, Q9UKW4, P56945, P11274, P13647, P55011, P09104, P04264, Q9NYI0, P51451, Q9Y6R1, P46459, Q9UQ49, P17987, Q12913, Q8N4C8, Q92736, P15498, Q9Y666, O14641, Q7KZI7, Q96K78, Q9NYJ8,
BLK	INTERPRO	IPR004842:Na/K/Cl co-transporter superfamily	1.621400002738233E-4	Q9Y666, P55011, Q9UHW9
BLK	GOTERM_MF_FAT	GO:0015296~anion:cation symporter activity	1.861502765341183E-4	Q9Y6R1, Q9Y666, P55011, Q9UHW9
BLK	SP_PIR_KEYWORDS	sh3 domain	1.9082936833653976E-4	P42681, P56945, Q9UKW4, P51451, P15498, Q9H6S3
BLK	UP_SEQ_FEATURE	active site:Proton acceptor	2.447521277005478E-4	P42681, P29317, P51451, Q15208, O75106, Q9UQ49, Q8N4C8, Q7KZI7, P09104
BMX	GOTERM_CC_FAT	GO:0005829~cytosol	2.08479580852454E-14	Q71U36, Q8WZ42, P17252, P35606, P08865, O60678, O75674, P41743, P29350, Q16644, P68366, P41279, Q99996, P51813, P19174, Q9BXI3, Q96P26, Q13813, P20042, Q08881, P23921, Q9NRC6, O76090, O75874, Q14204, Q8NFP9
BMX	SP_PIR_KEYWORDS	phosphoprotein	1.2715930286125366E-11	P42224, Q71U36, Q8WZ42, Q14997, P17252, P35606, P16157, P08865, Q92844, Q15303, P35568, Q12792, O60678, O75674, P41743, P29350, P11274, Q16644, P68366, P17661, Q9UPY3, Q9BZ29, P41279, P98077, Q99996, P51812, P51813, Q12913, P19174, P49454, P52948, Q93009,
BMX	SP_PIR_KEYWORDS	cytoplasm	1.9486032037387301E-10	P42224, Q8WZ42, P17252, P16157, P35606, P08865, Q92844, Q12792, O60678, P41743, P29350, Q16644, O75161, P17661, Q9UPY3, P41279, Q99996, P51813, Q9BXI3, P49454, Q96P26, Q13813, P23921, Q9NRC6, O75874, Q14204, Q8NFP9, O75563, O15117
BMX	GOTERM_BP_FAT	GO:0006468~protein amino acid phosphorylation	2.0404370034562168E-7	P41279, Q99996, P42224, P51812, P51813, Q8WZ42, P17252, Q12792, Q15303, Q08881, P41743, P11274, Q16644, O15117
BMX	GOTERM_BP_FAT	GO:0006793~phosphorus metabolic process	3.9437831616759293E-7	P41279, Q99996, P42224, P51812, Q12913, P51813, Q8WZ42, P17252, Q15303, Q12792, Q08881, P41743, P11274, P29350, Q16644, O15117
BMX	GOTERM_BP_FAT	GO:0006796~phosphate metabolic process	3.9437831616759293E-7	P41279, Q99996, P42224, P51812, Q12913, P51813, Q8WZ42, P17252, Q15303, Q12792, Q08881, P41743, P11274, P29350, Q16644, O15117
BMX	GOTERM_MF_FAT	GO:0004672~protein kinase activity	6.693684749023274E-7	P41279, Q99996, P51812, P51813, Q8WZ42, P17252, Q12792, P35568, Q15303, Q08881, P41743, P11274, Q16644
BMX	GOTERM_BP_FAT	GO:0016310~phosphorylation	1.615191588526023E-6	P41279, Q99996, P42224, P51812, P51813, Q8WZ42, P17252, Q12792, Q15303, Q08881, P41743, P11274, Q16644, O15117
BMX	SP_PIR_KEYWORDS	nucleotide-binding	1.6940012264503124E-6	P41279, Q99996, Q71U36, P51812, P51813, Q8WZ42, P17252, Q9BXI3, Q15303, Q08881, P41743, P23921, P11274, Q16644, Q14204, P68366, Q9UPY3
BMX	SP_PIR_KEYWORDS	ATP	1.837373780807715E-6	P41743, Q16644, P51812, Q14204, P51813, P17252, Q15303, P35568
BRDG1	INTERPRO	IPR004099:Pyridine nucleotide-disulphide oxidoreductase, dimerisation	1.0927846789027623E-6	O95831, Q9NNW7, Q16881
BRDG1	INTERPRO	IPR001327:Pyridine nucleotide-disulphide oxidoreductase, NAD-binding region	1.636004472895098E-6	O95831, Q9NNW7, Q16881
BRDG1	INTERPRO	IPR013027:FAD-dependent pyridine nucleotide-disulphide oxidoreductase	1.851053958195361E-5	O95831, Q9NNW7, Q16881
BRDG1	UP_SEQ_FEATURE	domain:Hcy-binding	2.0087437479150243E-5	Q9H2M3, Q93088, Q99707
BRDG1	INTERPRO	IPR003726:Homocysteine S-methyltransferase	2.2338517007043082E-5	Q9H2M3, Q93088, Q99707
BRDG1	GOTERM_MF_FAT	GO:0008898~homocysteine S-methyltransferase activity	3.3603765123734305E-5	Q9H2M3, Q93088, Q99707
BRDG1	SP_PIR_KEYWORDS	cytoplasm	3.6959602354422766E-5	Q9ULZ2, P46459, P17252, Q96EA4, Q13191, Q309B1, P21333, Q93088, Q9HC16, Q99707, Q86T24, Q96Q89, Q99459, O95361, O15530, O75874, Q92625, Q9H1Y0, Q16881, Q7Z3Y8, Q96AC1
BRDG1	SP_PIR_KEYWORDS	phosphoprotein	4.738531597262525E-5	P19784, O14745, Q9ULZ2, Q9Y2D8, Q96EA4, P17252, Q9Y6Y8, O95831, Q99459, O15530, Q92625, P11216, P04844, Q13263, Q96AC1, P46459, Q13191, Q9Y5X1, Q9BUQ8, Q8TAQ5, P13010, Q9UDV7, P21333, Q86T24, Q96Q89, Q9NQ84, P03372, O95361, Q15746, Q16881, P25445, O15164,
BRDG1	SP_PIR_KEYWORDS	acetylation	6.152820173793618E-5	P19784, O14745, P17252, Q9NNW7, P12429, Q9Y5X1, P13010, P21333, O95831, Q99459, O15091, O15530, O75874, Q92625, Q16881, P11216, Q13263, P35914
BRDG1	SP_PIR_KEYWORDS	metal-binding	8.766832483099582E-5	Q9H2M3, Q9BYV7, P46459, P17252, Q13191, Q8TAQ5, Q2M3W8, Q9UDV7, Q93088, Q9HC16, Q99707, Q86T24, P03372, O95361, Q15746, O75874, O15164, Q13263, P35914
BTK	SP_PIR_KEYWORDS	phosphoprotein	1.5409067963412823E-8	P42224, Q8IXJ6, P07333, P32927, Q14997, Q8NG31, P31948, P18433, P08865, Q06187, Q96P31, Q86WV1, O75674, Q16644, Q9H792, Q7L591, Q8WU20, P41279, Q9Y446, O94929, O75665, Q9C0B5, Q96ST3, Q8N6F7, Q14511, Q99704, P52948, Q93008, P38646, Q8IZD4, Q9NT99, Q8N1I0,
BTK	SP_PIR_KEYWORDS	cytoplasm	7.146760123842307E-8	P42224, Q8IXJ6, Q96IV0, Q9H467, P31948, P08865, Q06187, Q86WV1, Q16644, O75161, Q7L591, Q9BVQ7, Q8N7A1, P41279, O75665, O94929, Q8N6F7, Q14511, O00507, Q99704, Q93008, Q8IZD4, Q9H788, O75874, O75563, O15117
BTK	UP_SEQ_FEATURE	domain:SH3	8.824570880440526E-5	Q86WV1, Q8N1I0, O75563, O15117, Q14511, Q06187
BTK	SP_PIR_KEYWORDS	sh3 domain	1.9082936833653976E-4	Q86WV1, Q8N1I0, O75563, O15117, Q14511, Q06187
BTK	INTERPRO	IPR001452:Src homology-3 domain	2.917508124871246E-4	Q86WV1, Q8N1I0, O75563, O15117, Q14511, Q06187
BTK	UP_SEQ_FEATURE	domain:IRS-type PTB	4.180471822543521E-4	Q8WU20, Q7L591, Q99704
BTK	INTERPRO	IPR002404:Insulin receptor substrate-1, PTB	4.8371972461539294E-4	Q8WU20, Q7L591, Q99704
BTK	SP_PIR_KEYWORDS	acetylation	5.573870729686397E-4	Q8TDN6, Q8IXJ6, Q96ST3, Q96IV0, P31948, P08865, Q99704, Q06187, P52948, P38646, Q8IZD4, Q16644, Q9H788, O75874, O15042, Q7L591, O15117
BTK	SMART	SM00326:SH3	5.988249544807118E-4	Q86WV1, Q8N1I0, O75563, O15117, Q14511, Q06187
BTK	GOTERM_BP_FAT	GO:0006468~protein amino acid phosphorylation	6.330556873444305E-4	P41279, P42224, P07333, Q16644, Q9H792, Q8WU20, P18433, O15117, Q06187
CRKL	GOTERM_CC_FAT	GO:0005829~cytosol	6.824456214036923E-18	P25788, Q13257, Q8WZ42, O14920, O14964, P20618, P53621, P56945, Q9NRA8, P42684, Q16644, P48147, P57721, P42345, P00813, P24298, P07948, Q99996, Q9UJW3, Q9H1K1, Q04637, P14923, P00519, Q96M96, Q13480, Q5JSP0, Q13557, P41091
CRKL	SP_PIR_KEYWORDS	cytoplasm	2.6611564323678874E-12	P20929, P25788, Q13257, Q8WZ42, O14920, O14964, O43264, Q16555, Q5JTC6, P20618, P53621, P56945, Q9NRA8, P42684, Q16644, P48147, O60716, P57721, P07948, P24298, Q99996, Q9H1K1, P14923, P00519, Q96M96, Q99704, Q8IZD4, O95487, Q5JSP0, P11532
CRKL	SP_PIR_KEYWORDS	phosphoprotein	1.574564754237465E-11	Q13257, P25788, Q8WZ42, Q14997, O14920, O14964, O43264, Q16555, Q5JTC6, P20618, P53621, P46109, P56945, Q9NRA8, P42684, Q16644, P11217, O60716, Q9UQM7, Q01432, P42345, P07948, Q12769, Q99996, Q9H1K1, Q04637, P14923, P00519, Q96M96, Q99704, Q8IZD4, O95487,
CRKL	KEGG_PATHWAY	hsa04012:ErbB signaling pathway	3.034827392734432E-8	Q13480, P46109, P42684, Q9UQM7, Q13555, P00519, P42345, Q13554, Q13557
CRKL	SP_PIR_KEYWORDS	kinase	3.878235461927132E-8	Q99996, Q8WZ42, O14920, P00519, Q99704, Q16644, P42684, Q9UQM7, Q13555, Q13554, P42345, Q13557, P07948
CRKL	INTERPRO	IPR013543:Calcium/calmodulin dependent protein kinase II, association-domain	6.396024023751752E-8	Q9UQM7, Q13555, Q13554, Q13557
CRKL	INTERPRO	IPR015742:Calcium/calmodulin-dependent protein kinase II isoform	6.396024023751752E-8	Q9UQM7, Q13555, Q13554, Q13557
CRKL	GOTERM_BP_FAT	GO:0006468~protein amino acid phosphorylation	8.411155270954E-8	Q99996, Q8WZ42, O14920, P00519, Q96M96, Q13480, P42684, Q16644, Q9UQM7, Q13555, Q13554, P42345, Q13557, P07948
CRKL	PIR_SUPERFAMILY	PIRSF000594:calcium/calmodulin-dependent protein kinase II	1.7316650967110182E-7	Q9UQM7, Q13555, Q13554, Q13557
CRKL	INTERPRO	IPR017441:Protein kinase, ATP binding site	1.7890419832807156E-7	Q99996, P42684, Q16644, Q8WZ42, O14920, Q9UQM7, Q13555, P00519, Q13554, Q13557, P07948
CRK	KEGG_PATHWAY	hsa04012:ErbB signaling pathway	4.659005587149413E-8	Q13480, P46109, P22681, Q9UQM7, Q13555, Q13554, P46108, Q13557
CRK	SP_PIR_KEYWORDS	phosphoprotein	6.56296231897366E-8	P52597, P22681, Q8WZ42, Q9UQB3, P16234, Q12774, P31943, Q01995, P20618, P53621, P46109, P56945, O14981, Q9H792, P11217, Q9UQM7, P46108, Q12769, Q8WWI1, Q9H1K1, Q9NQ75, Q9NZI5, Q96RT1, Q99704, O95487, Q13480, Q92734, Q7Z401, P55795, Q9HBB8, Q14202, Q13555,
CRK	INTERPRO	IPR015742:Calcium/calmodulin-dependent protein kinase II isoform	7.353649832461636E-8	Q9UQM7, Q13555, Q13554, Q13557
CRK	INTERPRO	IPR013543:Calcium/calmodulin dependent protein kinase II, association-domain	7.353649832461636E-8	Q9UQM7, Q13555, Q13554, Q13557
CRK	PIR_SUPERFAMILY	PIRSF000594:calcium/calmodulin-dependent protein kinase II	1.1986186131851522E-7	Q9UQM7, Q13555, Q13554, Q13557
CRK	GOTERM_BP_FAT	GO:0046777~protein amino acid autophosphorylation	9.734893366688011E-6	Q9UQM7, P16234, Q13555, O15164, Q13554, Q13557
CRK	KEGG_PATHWAY	hsa04722:Neurotrophin signaling pathway	1.0093783817408329E-5	Q13480, P46109, Q9UQM7, Q13555, Q13554, P46108, Q13557
CRK	INTERPRO	IPR012996:Zinc finger, CHHC-type	2.1368133834871285E-5	P55795, P52597, P31943
CRK	GOTERM_MF_FAT	GO:0004672~protein kinase activity	2.6802122253546823E-5	Q92734, P46109, Q9H792, Q8WZ42, Q9UQM7, Q9NQ75, P16234, Q13555, O15164, Q13554, Q13557
CRK	GOTERM_CC_FAT	GO:0030659~cytoplasmic vesicle membrane	3.5332335728039166E-5	O95487, P53621, Q9UQM7, Q13555, Q13554, Q13557
CTEN	SP_PIR_KEYWORDS	cytoplasm	1.1235406754830006E-13	Q9NR46, Q8IXJ6, Q9H467, P27797, P35606, P08865, P35222, P56945, Q9HBI0, P29350, O15530, P29474, Q8WXH0, Q06124, Q13615, O75083, Q7L591, Q9UGP4, Q9UHB9, Q9BVQ7, O94929, Q9HD43, P05787, Q8IZP0, P00519, Q14511, O00507, Q93008, Q6PIY7, O75112, Q8IZW8, Q5XXA6,
CTEN	SP_PIR_KEYWORDS	phosphoprotein	3.9977201113245687E-7	Q13596, Q8IXJ6, P35606, P08865, P35222, Q9Y4I1, Q02763, P56945, P29350, O15530, Q9H792, P29474, Q8WXH0, Q13615, Q06124, O75083, Q7L591, Q9UGP4, Q9UHB9, O94929, Q68CZ2, Q9HD43, P05787, Q8IZP0, P00519, Q14511, Q93008, Q99549, Q96GA3, P10721, Q6PIY7, Q15746,
CTEN	SP_PIR_KEYWORDS	cytoskeleton	3.7304815639846506E-6	Q9HBI0, Q8IXJ6, O75112, P29474, Q8WXH0, O75083, Q8IZW8, Q8IZP0, P00519, Q14511, P35222
CTEN	GOTERM_CC_FAT	GO:0005912~adherens junction	5.7820809218963224E-6	P56945, Q9HBI0, Q05397, Q68CZ2, Q8IZW8, Q14511, P35222
CTEN	GOTERM_CC_FAT	GO:0070161~anchoring junction	1.0509766064102113E-5	P56945, Q9HBI0, Q05397, Q68CZ2, Q8IZW8, Q14511, P35222
CTEN	GOTERM_CC_FAT	GO:0005925~focal adhesion	1.1939797936375776E-5	P56945, Q9HBI0, Q05397, Q68CZ2, Q8IZW8, Q14511
CTEN	GOTERM_CC_FAT	GO:0005924~cell-substrate adherens junction	1.4402431301384217E-5	P56945, Q9HBI0, Q05397, Q68CZ2, Q8IZW8, Q14511
CTEN	GOTERM_CC_FAT	GO:0030055~cell-substrate junction	1.882077233725714E-5	P56945, Q9HBI0, Q05397, Q68CZ2, Q8IZW8, Q14511
CTEN	GOTERM_CC_FAT	GO:0016323~basolateral plasma membrane	2.6930994771310838E-5	P56945, Q9HBI0, Q05397, Q68CZ2, Q8IZW8, Q14511, P35222
CTEN	KEGG_PATHWAY	hsa04510:Focal adhesion	3.0421090920777552E-5	P56945, Q9HBI0, Q15746, O15530, Q05397, P35222, P78509
E109111	SP_PIR_KEYWORDS	nucleus	7.89976452850587E-13	Q9NPI6, Q96K58, P14866, Q9UPP1, P17931, Q9Y230, P06493, Q92800, O95831, P10275, Q8NF91, Q460N5, P37231, Q6P9A3, Q99959, Q86UW9, O60437, P18583, Q96ST3, Q6EMB2, Q13155, Q9BUQ8, Q9NQ33, O60281, P25205, Q7KZ85, Q9UQR0, Q13627, Q13609, Q14764, Q9UER7, Q53GS9,
E109111	SP_PIR_KEYWORDS	phosphoprotein	2.2045471583664777E-11	Q9NPI6, O94875, O15169, P14866, Q9UPP1, Q9Y230, P17931, P06493, O95831, P10275, Q8NF91, P09619, Q92625, Q86TU7, P37231, Q9Y3A5, Q99959, Q86UW9, O60437, P18583, Q9Y616, Q96ST3, Q6EMB2, Q13155, Q9BUQ8, Q14517, P19367, O60281, P35579, P25205, Q7KZ85, Q9UQR0,
E109111	SP_PIR_KEYWORDS	acetylation	1.5936381014552795E-5	P18583, Q96ST3, P14866, P17931, Q9Y230, P06493, P19367, O60281, P35579, P25205, O95831, Q7KZ85, Q92625, Q14764, Q9Y3A5, Q9UER7, Q53GS9, P04792, Q86UW9
E109111	SP_PIR_KEYWORDS	atp-binding	1.1428811148361197E-4	Q9Y616, Q9BUQ8, Q9Y230, P06493, P19367, Q08828, P35579, P25205, P09619, P33527, Q07912, Q13627, O14647
E109111	SP_PIR_KEYWORDS	Transcription	1.6620412672638455E-4	Q96ST3, Q6EMB2, Q96K58, Q9UPP1, Q9Y230, Q9NQ33, O60281, P25205, Q92800, P10275, Q7KZ85, Q9UQR0, Q460N5, Q9UER7, P37231, Q6P9A3
E109111	SP_PIR_KEYWORDS	ATP	3.600545927461473E-4	P09619, P33527, Q13627, Q07912, P06493, P19367
E109111	GOTERM_MF_FAT	GO:0030554~adenyl nucleotide binding	3.6683003508159687E-4	Q9Y616, Q9BUQ8, Q9Y230, P06493, P19367, P35579, Q08828, P25205, O95831, P09619, P33527, Q07912, Q13627, O14647
E109111	GOTERM_MF_FAT	GO:0001883~purine nucleoside binding	4.291962883024355E-4	Q9Y616, Q9BUQ8, Q9Y230, P06493, P19367, P35579, Q08828, P25205, O95831, P09619, P33527, Q07912, Q13627, O14647
E109111	GOTERM_MF_FAT	GO:0001882~nucleoside binding	4.607185698475514E-4	Q9Y616, Q9BUQ8, Q9Y230, P06493, P19367, P35579, Q08828, P25205, O95831, P09619, P33527, Q07912, Q13627, O14647
E109111	SP_PIR_KEYWORDS	transcription regulation	4.7648603016272207E-4	Q96ST3, Q96K58, Q9UPP1, Q9Y230, Q9NQ33, O60281, P25205, Q92800, P10275, Q7KZ85, Q9UQR0, Q460N5, Q9UER7, P37231, Q6P9A3
E185634	GOTERM_CC_FAT	GO:0005886~plasma membrane	1.2403770152410637E-15	P07355, P53794, O14745, Q9P244, P61026, P16234, Q8WUD1, P35221, P61106, P33151, O00750, P31751, Q5JQS5, Q9HB21, P25098, P02679, Q9NYI0, P46020, Q8NH00, Q99541, Q9Y6N7, Q8IYK8, P52735, O00591, Q86T24, Q96RT1, P34982, P12259, Q14517, P35579, Q8NGM9, Q92556,
E185634	GOTERM_CC_FAT	GO:0044459~plasma membrane part	6.765309042677976E-8	P53794, P02679, Q9NYI0, O14745, P46020, Q9P244, P61026, Q9Y6N7, P16234, Q8WUD1, P35221, O00591, P34982, Q96RT1, Q14517, P35579, P07550, P61106, P33151, Q6S5L8, Q14542, P06127, P25098, P51686
E185634	SP_PIR_KEYWORDS	cell membrane	8.946817051670117E-8	Q9NYI0, P46020, P61026, Q8NH00, Q8WUD1, Q8IYK8, P35221, O00591, P34982, Q14517, Q8NGM9, Q92556, P07550, P61106, P33151, Q6S5L8, O00750, Q5JQS5, Q14542, Q9HB21, P51686
E185634	SP_PIR_KEYWORDS	phosphoprotein	3.342462745335632E-6	P07355, O14745, Q9P244, P16234, P35221, P61106, P33151, O95817, P31751, O00750, Q9HB21, P25098, Q9NYI0, Q92990, P46020, Q9Y6N7, P52735, Q9BXI6, Q86T24, Q96RT1, P34982, A1X283, P12259, Q14517, P35579, Q9UPU7, Q92556, O43752, P07550, Q6S5L8, Q14542, O94921,
E185634	SP_PIR_KEYWORDS	membrane	6.501160013770012E-5	P53794, O14745, Q9P244, P61026, P16234, Q8WUD1, P35221, P61106, P33151, O00750, Q5JQS5, Q9HB21, Q9NYI0, P46020, Q8NH00, Q99541, Q9Y6N7, Q8IYK8, O00591, P34982, Q14517, Q8NGM9, Q92556, O43752, P07550, Q6S5L8, Q14542, P06127, Q14184, P51686
E185634	INTERPRO	IPR001849:Pleckstrin homology	1.366859196466597E-4	Q92556, Q9NYI0, P31751, P52735, Q9HB21, P25098, Q9UPU7
E185634	GOTERM_CC_FAT	GO:0045202~synapse	1.635094461695276E-4	Q9NYI0, Q9P244, Q6S5L8, O00591, Q14184, P46821, P35579, P25098
E185634	INTERPRO	IPR011993:Pleckstrin homology-type	2.2237382505269223E-4	Q92556, Q9NYI0, Q6S5L8, P31751, Q9HB21, P25098, Q9UPU7
E185634	UP_SEQ_FEATURE	domain:PH	3.1158789774583687E-4	Q92556, Q9NYI0, P31751, P52735, P25098, Q9UPU7
E185634	GOTERM_MF_FAT	GO:0005543~phospholipid binding	3.4965084739214513E-4	P07355, O00750, Q14184, A1X283, P46821, Q9HB21
EAT2	GOTERM_BP_FAT	GO:0007242~intracellular signaling cascade	5.427879015195412E-8	O75815, O60503, Q9BXR5, Q9Y4G8, Q9NWQ8, Q5TCQ9, Q9NNX6, O43561, Q63HR2, P40145, P61106, Q15052, P14317, Q9GZY6, O43294, Q9H2X3, P61224
EAT2	SP_PIR_KEYWORDS	phosphoprotein	5.017337437269949E-6	O75815, O60503, Q58EX7, Q8TD08, Q9NWQ8, Q9Y4G8, Q5TCQ9, Q63HR2, Q01484, P22105, P61106, Q15052, Q9P2K8, O43294, P08758, P61224, Q86UK7, O60347, Q9H2M9, Q9Y5X1, Q8IZP0, Q8IXS8, Q9UJY1, O43561, Q96RL7, O95196, P14317, Q9GZY6, Q9P2F8, Q9Y566, P32248, O60486
EAT2	GOTERM_CC_FAT	GO:0005886~plasma membrane	2.553060837706483E-5	O60503, Q12836, Q9Y5X1, Q8IZP0, Q9BXR5, Q9NWQ8, Q9Y4G8, Q5TCQ9, Q9NNX6, O43561, Q63HR2, Q01484, P40145, O95196, P61106, Q9GZY6, O43294, Q9Y566, Q9H2X3, P32248, O60486, P61224
EAT2	SP_PIR_KEYWORDS	immune response	1.3748413330230499E-4	Q9GZY6, Q9BXR5, Q9NWQ8, Q9H2X3, Q9NNX6, O43561
EAT2	SP_PIR_KEYWORDS	cell membrane	1.907678703445051E-4	Q12836, Q9Y4G8, Q9NWQ8, Q5TCQ9, Q9NNX6, O43561, Q63HR2, Q01484, P61106, O95196, Q9GZY6, Q9Y566, Q9H2X3, P32248, P61224
EAT2	GOTERM_MF_FAT	GO:0030695~GTPase regulator activity	6.601981481007678E-4	O75815, Q58EX7, Q15052, O60347, Q9P2F8, Q9H2M9, Q9Y4G8
EAT2	UP_SEQ_FEATURE	domain:SH3	6.618397608099519E-4	Q15052, P14317, Q9Y5X1, Q9Y566, Q8IZP0
EAT2	GOTERM_MF_FAT	GO:0060589~nucleoside-triphosphatase regulator activity	7.411009572987575E-4	O75815, Q58EX7, Q15052, O60347, Q9P2F8, Q9H2M9, Q9Y4G8
EAT2	SP_PIR_KEYWORDS	sh3 domain	0.00122082	Q15052, P14317, Q9Y5X1, Q9Y566, Q8IZP0
EAT2	INTERPRO	IPR001452:Src homology-3 domain	0.00165575	Q15052, P14317, Q9Y5X1, Q9Y566, Q8IZP0
FER	INTERPRO	IPR004001:Actin, conserved site	6.126862206514714E-10	P62736, P68032, P63261, P68133, P60709, P63267
FER	PIR_SUPERFAMILY	PIRSF002337:Actin	8.646673296590925E-10	P62736, P68032, P63261, P68133, P60709, P63267
FER	SP_PIR_KEYWORDS	methylated amino acid	1.1771211066163194E-9	P62736, P68032, P63261, P68133, P60709, P63267
FER	SP_PIR_KEYWORDS	phosphoprotein	5.450146597341691E-9	P62736, Q13596, Q9UPN6, Q9NPI1, Q8WZ42, P60709, O15357, O75674, Q02763, P27986, Q92569, Q9H792, Q02410, Q7L591, P13807, P06400, P68104, O94929, Q9BWW4, Q9Y5X1, P13010, P16591, Q5JSL3, P28288, A1X283, P20042, Q9BWG4, Q15746, Q9P2N2, Q9NZJ4, Q8IWV1, O75563,
FER	SP_PIR_KEYWORDS	atp-binding	6.504503858484919E-8	P62736, Q8WZ42, P60709, P16591, P13010, P28288, Q02763, Q15746, Q8TDI0, Q9H792, Q8NDG6, P68032, P63261, P68133, Q9BVQ7, P63267, O14647
FER	INTERPRO	IPR004000:Actin/actin-like	7.694571713586709E-8	P62736, P68032, P63261, P68133, P60709, P63267
FER	SP_PIR_KEYWORDS	nucleotide-binding	2.9862659300842104E-7	P68104, P62736, Q8WZ42, P60709, P16591, P13010, P28288, Q02763, Q15746, Q8TDI0, Q9H792, Q8NDG6, P68032, P63261, P68133, Q9BVQ7, O14647, P63267
FER	SMART	SM00268:ACTIN	7.507976807233275E-7	P62736, P68032, P63261, P68133, P60709, P63267
FER	GOTERM_MF_FAT	GO:0005524~ATP binding	3.9665529001825E-6	P62736, Q8WZ42, P60709, P16591, P13010, P28288, Q02763, Q15746, Q8TDI0, Q9H792, Q8NDG6, Q9NZJ4, P68032, P63261, P68133, Q9BVQ7, O14647, P63267
FER	GOTERM_MF_FAT	GO:0032553~ribonucleotide binding	4.036525731692648E-6	P68104, P62736, Q8WZ42, P13010, P60709, Q5JSL3, P16591, P28288, Q02763, Q15746, Q9H792, Q8TDI0, Q8NDG6, Q9NZJ4, P68032, P63261, P68133, Q9BVQ7, O14647, P63267
FES	SP_PIR_KEYWORDS	phosphoprotein	1.0999999307786318E-10	P56715, Q13596, P07332, Q7Z4H7, Q9NPI1, Q8WZ42, P16157, P30086, Q8N9B5, O15357, P06737, P35222, Q02763, O75674, P07900, P29350, Q9H792, Q8WXH0, Q7L591, Q9BZ29, P25098, P13807, P68104, O94929, Q68CZ2, Q13107, Q9HD43, Q9Y5X1, Q5JSL3, P28288, P05067, A1X283,
FES	SP_PIR_KEYWORDS	cytoplasm	2.1343712982621894E-7	Q9NR46, Q7Z4H7, Q9H467, Q8WZ42, P30520, P16157, P30086, Q8N9B5, O15357, P35222, P51693, P07900, P29350, Q8WXH0, Q7L591, Q9BVQ7, P68104, O94929, Q9HD43, Q13107, A1X283, Q13813, P08238, O75563, Q6ZNL6
FES	SP_PIR_KEYWORDS	SH2 domain	8.212533036653787E-6	P29350, P07332, P15498, Q68CZ2, P52757, O15357
FES	INTERPRO	IPR000980:SH2 motif	1.3225941228366874E-5	P29350, P07332, P15498, Q68CZ2, P52757, O15357
FES	GOTERM_CC_FAT	GO:0005829~cytosol	2.5953372514664915E-5	P68104, P07332, Q8WZ42, O15357, P35222, P20042, Q13813, O75674, P07900, P29350, P15498, P13807, P25098, Q86UY8
FES	UP_SEQ_FEATURE	domain:SH2	9.816874050598903E-5	P07332, P15498, Q68CZ2, P52757, O15357
FES	INTERPRO	IPR001849:Pleckstrin homology	1.0727277610163218E-4	P15498, O75563, Q5JSL3, Q7L591, Q9BZ29, P25098, Q6ZNL6
FES	SMART	SM00252:SH2	1.1675239877025352E-4	P29350, P07332, P15498, Q68CZ2, P52757, O15357
FES	SP_PIR_KEYWORDS	sh3 domain	1.7287807509861521E-4	Q9NR46, P15498, O75563, Q9Y5X1, A1X283, Q13813
FES	INTERPRO	IPR011993:Pleckstrin homology-type	1.7498421798913075E-4	Q68CZ2, O75563, Q5JSL3, Q7L591, Q9BZ29, P25098, Q6ZNL6
FGR	SP_PIR_KEYWORDS	cytoskeleton	5.75408454082268E-9	P20929, Q9Y6D9, Q9Y281, P14923, P23528, P09493, Q6ZV73, Q12955, P06753, Q9UBT7, P13647, O75161, O43312, P04792
FGR	SP_PIR_KEYWORDS	phosphoprotein	4.0760948711380985E-8	P07437, P31785, Q9NPI6, P17658, Q71U36, Q15208, P17252, P29692, P23528, P68371, Q9H4M9, P55196, Q6ZV73, P68366, Q9UBT7, P13647, P31751, P09104, O43312, P09769, P22694, P12277, Q9Y6D9, Q9Y281, P17987, Q8N4C8, P06744, P14923, Q99704, Q9Y4H2, Q12955, P06753,
FGR	GOTERM_CC_FAT	GO:0005856~cytoskeleton	1.3741469906164103E-7	P07437, P20929, Q71U36, Q9Y6D9, Q9Y281, P17987, P14923, P23528, P68371, P09493, Q12955, Q6ZV73, P68366, Q9UBT7, P06753, P13647, O75161, O43312, P04792, P31749
FGR	SP_PIR_KEYWORDS	cytoplasm	5.622971382796155E-7	P20929, Q9NPI6, Q15208, P17252, P23528, Q6ZV73, Q9UBT7, O75161, P09104, O43312, P22694, Q9Y6D9, P12277, Q9Y281, P17987, P14923, P06744, Q99704, P09493, Q12955, P06753, O15371, Q9H3M7, P04792, P31749
FGR	UP_SEQ_FEATURE	binding site:ATP	1.146129495929711E-6	Q15208, P12277, P60891, Q8N4C8, P17252, P31751, P00533, P09769, P22694, Q9H4M9, P31749
FGR	SP_PIR_KEYWORDS	kinase	1.1843672001223565E-6	Q8NHU3, Q15208, P12277, P60891, Q8N4C8, P17252, P31751, P00533, Q99704, P09769, P22694, P31749
FGR	GOTERM_CC_FAT	GO:0005829~cytosol	2.321691803263663E-6	P07437, O43242, Q71U36, Q9Y6D9, P12277, P17987, P17252, P29692, P14923, P68371, P55196, P68366, P60891, O15371, P31751, P09104, P22694, P31749
FGR	KEGG_PATHWAY	hsa04540:Gap junction	1.256767450438819E-5	P07437, Q71U36, P68366, P17252, P00533, P22694, P68371
FGR	UP_SEQ_FEATURE	domain:AGC-kinase C-terminal	1.2808405993460488E-5	Q15208, P17252, P31751, P22694, P31749
FGR	SMART	SM00133:S_TK_X	1.3874136607429947E-5	Q15208, P17252, P31751, P22694, P31749
FRK	SP_PIR_KEYWORDS	cytoplasm	1.3086759672274961E-11	Q9UGI8, O14744, P43686, P35998, Q9NR46, P05783, O15357, Q12792, Q8WWN8, P62195, P42680, P42685, Q8WWF8, O15304, Q96Q15, P10636, Q9UBC9, Q96QV1, Q9Y371, P15941, Q8IYM9, P49454, Q9P1U1, P55795, Q14204, Q96JZ2, Q53EL6, P50748, P58340, Q8WYP3
FRK	UP_SEQ_FEATURE	repeat:1-2	3.482356474302062E-5	P55795, Q15746, P31943, P49454
FRK	UP_SEQ_FEATURE	repeat:1-1	3.910897403967664E-5	P55795, Q15746, P31943, P49454
FRK	UP_SEQ_FEATURE	repeat:2-2	3.910897403967664E-5	P55795, Q15746, P31943, P49454
FRK	GOTERM_CC_FAT	GO:0005856~cytoskeleton	4.780791576151111E-5	P10636, P15260, P05783, O15357, Q12792, P31943, Q8WWN8, Q8N3U4, P49454, Q9P1U1, P55795, Q14204, P50748
FRK	SP_PIR_KEYWORDS	phosphoprotein	8.166289043909752E-5	P43686, Q9UGI8, P05783, P31943, O15357, Q12792, Q8WWN8, P42680, Q8N3R9, Q8TA86, P42685, Q9UJF2, O15304, Q96Q15, P10636, P15260, Q96CW6, P15941, P49454, Q8N3U4, Q9P1U1, P55795, P54764, Q15746, Q14204, Q96JZ2, Q12996, Q53EL6, P50748, P23229, P58340, Q8WYP3
FRK	UP_SEQ_FEATURE	domain:SH2	9.033413103140973E-5	P42680, P42685, Q96JZ2, O15357, Q8WYP3
FRK	SP_PIR_KEYWORDS	SH2 domain	1.547351661439488E-4	P42680, P42685, Q96JZ2, O15357, Q8WYP3
FRK	INTERPRO	IPR005937:26S proteasome subunit P45	1.5527152539795665E-4	P35998, P43686, P62195
FRK	INTERPRO	IPR000980:SH2 motif	2.455521544746176E-4	P42680, P42685, Q96JZ2, O15357, Q8WYP3
GRAP2	SP_PIR_KEYWORDS	cytoplasm	2.918197649866009E-14	P62736, Q8WZ64, Q14289, Q9H467, O95391, P08865, P29350, Q15058, Q8WXH0, Q9BYB0, Q9BZI7, Q13615, Q06124, P68032, Q9UPY3, O94851, Q99996, O15247, P05787, Q8IZP0, Q2M3C7, Q8IZD9, Q9NP74, Q05655, Q8N556, Q86TB9, Q14185, Q8TD57, P68133, Q8N4X5, Q86YR5, P02549,
GRAP2	SP_PIR_KEYWORDS	phosphoprotein	1.203326388539984E-9	P62736, Q8WZ64, Q9Y6G9, Q14289, O95391, O15013, P08865, Q9Y333, P29350, Q15058, Q9H792, P09619, Q8WXH0, Q9BYB0, Q9BZI7, Q13615, Q06124, Q9UPY3, Q9BZ29, Q99996, Q13077, P05787, Q8IZP0, Q8IZD9, Q9NP74, Q05655, P18031, Q9Y217, Q9Y4H2, Q9BZD4, O76090, Q8N556,
GRAP2	SP_PIR_KEYWORDS	cytoskeleton	5.916269897952197E-8	P62736, Q99996, Q8IZP0, Q15058, Q8N556, Q8WXH0, P68032, Q8TD57, P68133, O94851, P63267, P02549, Q16181
GRAP2	GOTERM_CC_FAT	GO:0005856~cytoskeleton	1.0592505635639673E-6	P62736, Q99996, Q9Y6G9, Q14289, P05787, Q8IZP0, Q15058, Q8WXH0, Q9BYB0, Q8N556, Q8TD57, P68032, P68133, O94851, P02549, P63267, Q16181
GRAP2	SP_PIR_KEYWORDS	coiled coil	7.058881741653329E-6	Q99996, Q13077, Q96QE4, P05787, Q8IZP0, O15013, Q9NP74, Q9BZD4, Q15058, Q8WXH0, Q9BYB0, Q8N556, Q13615, Q8TD57, Q8N4X5, O94851, Q9BZ29, Q16181
GRAP2	PIR_SUPERFAMILY	PIRSF002337:Actin	1.1226803721222997E-5	P62736, P68032, P68133, P63267
GRAP2	INTERPRO	IPR004001:Actin, conserved site	1.3036305572208804E-5	P62736, P68032, P68133, P63267
GRAP2	SP_PIR_KEYWORDS	methylated amino acid	1.8262807652764047E-5	P62736, P68032, P68133, P63267
GRAP2	SP_PIR_KEYWORDS	atp-binding	2.3968040437816742E-5	P62736, Q99996, Q9Y6G9, Q14289, Q05655, Q15058, P09619, Q9H792, Q8NEB9, P68032, Q8TD57, P68133, Q9UPY3, P63267
GRAP2	GOTERM_CC_FAT	GO:0030485~smooth muscle contractile fiber	5.421979572266573E-5	P62736, P68032, P63267
GRB10	SP_PIR_KEYWORDS	cytoplasm	9.892577745153764E-6	P35790, Q02880, P15924, P42224, Q9NR46, Q8WZ42, P52565, P52566, P34896, O43150, O00507, O43813, Q93008, Q13813, Q9Y237, Q5VWQ8, P29350, O75083, Q3I5F7, O15117, Q9UPY3, Q9NYJ8, Q8TDY2
GRB10	GOTERM_CC_FAT	GO:0005886~plasma membrane	1.5451333294073003E-5	P52565, Q8WUD1, P18433, Q8WXA8, Q9Y2P4, Q8NGX2, P61106, P32297, Q8NGV0, P28827, P15924, Q8NH37, Q12913, Q6IF00, Q9NP91, P05067, O43150, O43813, Q13813, Q13621, P35968, P15498, Q13322, Q96R27, P46821, Q9UHW9
GRB10	SP_PIR_KEYWORDS	tyrosine-specific phosphatase	7.057387872757426E-5	P29350, Q12913, P28827, P18433
GRB10	SMART	SM00194:PTPc	1.504018915275261E-4	P29350, Q12913, P28827, P18433
GRB10	INTERPRO	IPR000242:Protein-tyrosine phosphatase, receptor/non-receptor type	2.3243961854716195E-4	P29350, Q12913, P28827, P18433
GRB10	GOTERM_BP_FAT	GO:0007166~cell surface receptor linked signal transduction	4.3344652645459344E-4	Q8NH37, P42224, Q12913, Q6IF00, P18433, O00507, P05067, O43813, Q93008, Q8NGX2, P35968, P29350, P32297, P15498, Q8NGV0, Q13322, Q96R27
GRB10	GOTERM_BP_FAT	GO:0006796~phosphate metabolic process	4.8129026018946865E-4	P29350, P35968, P42224, Q9H792, Q8N4C8, Q8WZ42, Q12913, P28827, P18433, P05067, O15117, P78509
GRB10	GOTERM_BP_FAT	GO:0006793~phosphorus metabolic process	4.8129026018946865E-4	P29350, P35968, P42224, Q9H792, Q8N4C8, Q8WZ42, Q12913, P28827, P18433, P05067, O15117, P78509
GRB10	GOTERM_MF_FAT	GO:0030695~GTPase regulator activity	5.029335856138838E-4	Q5VWQ8, P15498, Q8N4C8, Q8WZ42, P52565, P52566, Q96PV0, O43150
GRB10	GOTERM_MF_FAT	GO:0060589~nucleoside-triphosphatase regulator activity	5.736005037684197E-4	Q5VWQ8, P15498, Q8N4C8, Q8WZ42, P52565, P52566, Q96PV0, O43150
GRB14	SP_PIR_KEYWORDS	cytoplasm	1.1202995879487113E-10	O95405, Q14449, Q8IXJ6, P55060, Q9H467, P08865, O15530, Q8WXH0, Q9Y4P1, Q13615, O75083, Q7L591, Q9BW04, Q9BVQ7, Q99996, P15924, P22626, Q8N6F7, P05787, Q8IZP0, Q14511, O00507, Q93008, Q5VWQ8, Q86TB9, O75563, P42025, Q9NYJ8, Q86YR5, Q8WYP3
GRB14	SP_PIR_KEYWORDS	phosphoprotein	2.0214850983844537E-7	Q14449, Q8IXJ6, P32927, P30613, P08865, Q9UMD9, Q96P31, O15530, Q9H792, Q8WXH0, Q9Y4P1, Q13615, P55011, O75083, Q7L591, Q8WU20, Q76FK4, Q99996, P15924, Q96JQ2, P22626, Q12913, Q8N4C8, Q8N6F7, P05787, Q8IZP0, Q14511, Q16288, Q93008, Q5VWQ8, Q9GZY6, Q9NZJ4,
GRB14	GOTERM_CC_FAT	GO:0005886~plasma membrane	7.02083377750139E-5	P15924, Q14449, P32927, Q12913, Q99541, P05787, Q8IZP0, P08865, Q14511, Q16288, O14966, Q9UMD9, Q96P31, Q9Y2P4, Q13621, O15530, Q8WXH0, Q9GZY6, P55011, O75563, Q7L591, Q8WU20, Q86YR5, P46821
GRB14	SP_PIR_KEYWORDS	alternative splicing	9.604264438073926E-5	O95405, Q8IXJ6, P32927, P30613, P55060, Q9UMD9, Q96P31, O15530, Q8WXH0, Q9Y4P1, P55011, Q13615, O75083, Q7L591, Q9BW04, Q9BVQ7, Q76FK4, Q99996, P15924, P22626, Q8N4C8, Q8IZP0, Q96PV0, Q16288, O00507, Q93008, Q13621, Q5VWQ8, Q9GZY6, Q9NZJ4, Q86TB9, Q9NYJ8,
GRB14	GOTERM_MF_FAT	GO:0005158~insulin receptor binding	9.748647031036439E-5	Q14449, O15530, Q8WU20, Q7L591
GRB14	UP_SEQ_FEATURE	splice variant	1.013362237560973E-4	O95405, Q8IXJ6, P32927, P30613, P55060, Q9UMD9, Q96P31, O15530, Q8WXH0, Q9Y4P1, P55011, Q13615, O75083, Q7L591, Q9BW04, Q9BVQ7, Q76FK4, Q99996, P15924, P22626, Q8N4C8, Q8IZP0, Q96PV0, Q16288, O00507, Q93008, Q13621, Q5VWQ8, Q9GZY6, Q9NZJ4, Q86TB9, Q9NYJ8,
GRB14	UP_SEQ_FEATURE	domain:PH	3.7787612178286805E-4	Q5VWQ8, Q14449, O15530, O75563, Q96PV0, Q7L591
GRB14	GOTERM_BP_FAT	GO:0007167~enzyme linked receptor protein signaling pathway	6.077937858848237E-4	O95405, Q12913, Q8IZP0, Q8WU20, O00507, Q16288, Q93008
GRB14	SP_PIR_KEYWORDS	cytoskeleton	0.00121363	Q99996, P15924, Q8IXJ6, Q8WXH0, O75083, P42025, Q8IZP0, Q14511
GRB14	INTERPRO	IPR011993:Pleckstrin homology-type	0.00158075	Q14449, O15530, O75563, Q96PV0, Q8WU20, Q7L591
GRB2	SP_PIR_KEYWORDS	phosphoprotein	7.403210838390388E-9	Q9UJX4, Q8NG31, Q9Y5Z7, Q9P241, P18433, O15013, P08865, Q96P31, Q9NWX6, Q93052, Q92823, Q9Y4I1, P55196, P10586, P41743, P40123, P62993, P09619, Q9BYB0, Q13615, O75083, Q5T5P2, Q9UPY3, Q76FK4, Q13131, P52272, P08575, Q12913, P00390, P05787, Q8IZP0, P18031,
GRB2	SP_PIR_KEYWORDS	tyrosine-specific phosphatase	1.206842030918935E-6	P10586, P08575, Q12913, P18433, P18031
GRB2	UP_SEQ_FEATURE	active site:Phosphocysteine intermediate	2.484528375111133E-6	P10586, P08575, Q12913, Q13615, P18433, P18031
GRB2	INTERPRO	IPR000242:Protein-tyrosine phosphatase, receptor/non-receptor type	5.137040573884646E-6	P10586, P08575, Q12913, P18433, P18031
GRB2	INTERPRO	IPR016130:Protein-tyrosine phosphatase, active site	5.550920929887895E-6	P10586, P08575, Q12913, Q13615, P18433, P18031
GRB2	GOTERM_CC_FAT	GO:0005886~plasma membrane	6.216252066786011E-6	Q9Y5Z7, P18433, P08865, Q93052, Q96P31, Q92823, P55196, P41743, P10586, P40123, P09619, Q9BYB0, Q9UKQ2, P63096, P52272, P08575, Q12913, P00390, P05787, Q8IZP0, Q9NP91, O14939, P18031, Q13813, Q9NYQ8, P33527, Q8N556, Q8NFP9
GRB2	GOTERM_CC_FAT	GO:0044459~plasma membrane part	8.176769984857776E-6	P52272, P08575, Q12913, P00390, Q9Y5Z7, Q8IZP0, Q9NP91, P18433, O14939, Q93052, Q92823, P18031, Q13813, P55196, P41743, P10586, P33527, P09619, Q8N556, Q9BYB0, P63096
GRB2	SMART	SM00194:PTPc	1.718904265575199E-5	P10586, P08575, Q12913, P18433, P18031
GRB2	SP_PIR_KEYWORDS	protein phosphatase	2.1671032636026683E-5	P10586, P08575, Q12913, Q13615, P18433, P18031
GRB2	SP_PIR_KEYWORDS	phosphoric monoester hydrolase	3.0834155631397035E-5	P10586, P08575, Q12913, P18433, P18031
HCK	SP_PIR_KEYWORDS	phosphoprotein	4.3556967368950684E-14	Q9NPI6, Q13596, Q71U36, Q8WZ42, Q9UQB3, P16157, P08865, Q6T4R5, Q9Y4I1, O75674, P61106, O15530, P68366, Q9H792, P11217, Q02410, Q68CJ6, Q06124, P62906, P08631, Q13402, Q9UPY3, Q9UFW8, Q07157, P06400, P41279, Q99996, Q6IQ23, Q99708, P09884, A1X283, O94986,
HCK	GOTERM_CC_FAT	GO:0005829~cytosol	2.893295766825879E-9	P41279, Q99996, Q71U36, Q8WZ42, P08865, O94986, P63173, P20042, O75674, P61106, O76090, O15530, P36871, P68366, Q06124, P57737, P62906, Q13402, O14713, Q99570
HCK	SP_PIR_KEYWORDS	nucleotide-binding	4.2007734809651777E-7	P41279, Q99996, Q71U36, Q8WZ42, Q9Y4I1, P10721, P61106, O15530, P68366, P11217, Q9H792, Q68CJ6, P08631, Q13402, Q9UPY3, P28370, O14647, Q99570
HCK	GOTERM_MF_FAT	GO:0019904~protein domain specific binding	4.114346242102174E-6	O75674, Q8N1I0, Q71U36, Q02410, Q06124, Q13402, A1X283, O75368, Q07157
HCK	SP_PIR_KEYWORDS	sh3 domain	1.490669460270127E-5	P20929, Q96RF0, Q8N1I0, P08631, Q13402, A1X283, Q07157
HCK	INTERPRO	IPR001452:Src homology-3 domain	2.1878046184703824E-5	P20929, Q96RF0, Q8N1I0, P08631, Q13402, A1X283, Q07157
HCK	GOTERM_MF_FAT	GO:0032553~ribonucleotide binding	2.4257636493152538E-5	P41279, Q99996, Q71U36, Q8WZ42, Q9Y4I1, P10721, P61106, O15530, P68366, P11217, Q9H792, P08631, Q13402, Q9UPY3, P28370, O14647, Q99570
HCK	GOTERM_MF_FAT	GO:0032555~purine ribonucleotide binding	2.4257636493152538E-5	P41279, Q99996, Q71U36, Q8WZ42, Q9Y4I1, P10721, P61106, O15530, P68366, P11217, Q9H792, P08631, Q13402, Q9UPY3, P28370, O14647, Q99570
HCK	UP_SEQ_FEATURE	nucleotide phosphate-binding region:ATP	2.4818370269062832E-5	P41279, P10721, Q9Y4I1, O15530, Q9H792, Q8WZ42, P08631, Q13402, Q9UPY3, P28370, O14647, Q99570
HCK	GOTERM_MF_FAT	GO:0017076~purine nucleotide binding	4.2159644875064895E-5	P41279, Q99996, Q71U36, Q8WZ42, Q9Y4I1, P10721, P61106, O15530, P68366, P11217, Q9H792, P08631, Q13402, Q9UPY3, P28370, O14647, Q99570
INPPL1	SP_PIR_KEYWORDS	cytoplasm	1.582231304750558E-6	Q9UGI8, Q9NPI6, Q15283, Q8WZ42, Q9P225, Q86UR1, Q86T24, O00507, O15357, Q9NTJ3, Q93008, Q04656, O15530, Q8WWQ8, P29474, P57737, O75161, Q7L591, Q9NP31, Q9P258, Q7Z3Y8, O95171, Q9Y573, Q96AC1
INPPL1	GOTERM_CC_FAT	GO:0005886~plasma membrane	1.1567619794410112E-5	P53794, Q8IZF3, Q9UGI8, O15259, O14763, P29317, Q86UR1, Q8WUD1, Q03135, Q8NGX2, P61106, O15530, P29474, Q7L591, O75575, Q96AC1, P43627, P43626, Q6IF00, Q86T24, Q04656, P03372, P30926, Q8WWQ8, Q8NGG4, Q7KZI7, Q96R27, Q9HAR2, Q9UHW9
INPPL1	SP_PIR_KEYWORDS	cell membrane	1.575440273463198E-5	Q8IZF3, P43627, P43626, Q86UR1, Q8WUD1, Q6IF00, Q03135, Q04656, P61106, Q8NGX2, P30926, Q8WWQ8, P29474, Q8NGG4, Q7KZI7, Q7L591, Q96R27, Q9HAR2, O75575
INPPL1	SP_PIR_KEYWORDS	phosphoprotein	2.5656223130478896E-4	Q9NPI6, Q9UGI8, P29317, Q8WZ42, Q9P225, Q86UR1, O15357, Q9NTJ3, Q03135, Q96PY6, P61106, O15530, Q9H792, P29474, Q7L591, Q9NP31, Q9P258, P61313, O75575, Q96AC1, Q86T24, P52948, Q93008, Q04656, P03372, Q8N1I0, Q8WWQ8, P57737, Q7KZI7, O95171, Q9HAR2, Q9UHW9
INPPL1	GOTERM_CC_FAT	GO:0044459~plasma membrane part	6.069615964733475E-4	P53794, Q9UGI8, O15259, P29317, P43627, P43626, Q86UR1, Q8WUD1, Q03135, Q04656, P03372, P61106, P30926, Q8WWQ8, P29474, Q7L591, O75575, Q9UHW9, Q96AC1
INPPL1	SP_PIR_KEYWORDS	membrane	9.056450771786903E-4	P53794, Q8IZF3, O14763, P29317, Q86UR1, Q8WUD1, O15357, Q03135, Q8NGX2, P61106, O15530, P29474, Q7L591, O75575, P43627, P43626, Q6IF00, P52948, Q04656, P30926, Q8N1I0, Q8WWQ8, P57737, Q8NGG4, Q7KZI7, Q96R27, O95171, Q9HAR2, Q9UHW9
INPPL1	SP_PIR_KEYWORDS	receptor	0.00177339	Q8IZF3, P29317, O14763, P43627, P43626, Q6IF00, P03372, Q8NGX2, Q8WWQ8, Q8NGG4, Q96R27, Q9HAR2, O75575
INPPL1	GOTERM_CC_FAT	GO:0044431~Golgi apparatus part	0.00324284	Q04656, P61106, P29474, P57737, Q8WUD1, Q03135
INPPL1	GOTERM_BP_FAT	GO:0048514~blood vessel morphogenesis	0.00479377	Q04656, Q8WWQ8, P29474, Q9NP31, Q03135
INPPL1	GOTERM_CC_FAT	GO:0016323~basolateral plasma membrane	0.00510373	Q9UGI8, Q04656, Q9UHW9, Q03135, Q96AC1
ITK	GOTERM_CC_FAT	GO:0005829~cytosol	6.90681643948024E-14	Q16543, O15294, Q8WZ42, P31321, Q9P243, P17252, Q8WUM4, P19174, P35606, Q01970, Q7Z7A1, Q99707, Q08881, Q13480, O75674, P27986, P56945, P15498, P60891, O00459, P22694, P25098, Q9UK41, Q9UJU6
ITK	SP_PIR_KEYWORDS	sh3 domain	3.4851788827976295E-11	Q08881, P20936, P56945, P27986, P15498, P16885, O75563, P19174, O15117, O00459, Q9UJU6
ITK	INTERPRO	IPR001849:Pleckstrin homology	1.0392068169993008E-10	Q08881, P20936, Q13480, P15498, P16885, O75563, P19174, O60496, P35568, P42331, Q9BZ29, P25098
ITK	UP_SEQ_FEATURE	domain:PH	1.219109649768178E-10	Q08881, P20936, Q13480, P15498, P16885, O75563, O60496, P35568, P42331, Q9BZ29, P25098
ITK	SP_PIR_KEYWORDS	SH2 domain	1.4200627166446202E-10	Q08881, P20936, P27986, P15498, P16885, Q13191, P19174, O00459, Q8WV28
ITK	INTERPRO	IPR001452:Src homology-3 domain	1.6051904260410648E-10	Q08881, P20936, P56945, P27986, P15498, P16885, O75563, P19174, O15117, O00459, Q9UJU6
ITK	UP_SEQ_FEATURE	domain:SH3	2.191440537894739E-10	Q08881, P20936, P56945, P27986, P16885, O75563, P19174, O15117, O00459, Q9UJU6
ITK	SP_PIR_KEYWORDS	phosphoprotein	3.332012319995786E-10	P04406, Q8WZ42, P17252, P35606, Q01970, Q15303, P35568, O75674, P56945, P27986, P13647, P16885, P17661, O60496, P22694, Q9BZ29, P25098, Q9UJU6, P20936, Q16543, Q9Y3M8, O15294, P31321, Q13191, Q8WUM4, P19174, Q7Z7A1, P05067, Q8WV28, Q8IZD4, Q08881, Q13480,
ITK	INTERPRO	IPR000980:SH2 motif	4.368984571840573E-10	Q08881, P20936, P27986, P15498, P16885, Q13191, P19174, O00459, Q8WV28
ITK	SMART	SM00233:PH	8.6169588785094E-10	Q08881, P20936, Q13480, P15498, P16885, O75563, P19174, O60496, P35568, P42331, Q9BZ29, P25098
LCK	SP_PIR_KEYWORDS	phosphoprotein	8.272171459351899E-8	Q9NPI6, P29317, P06239, Q71U36, Q15208, Q9Y3P8, P16157, P18433, Q9Y4I1, O75674, P61106, O15530, P68366, Q02410, P11217, Q9BYB0, P62906, Q7L591, Q8WU20, Q9UPY3, Q07157, P41279, O60242, Q99996, Q12913, Q8N4C8, Q9UGN4, P20042, P10721, Q9NT99, Q8N1I0, O76090,
LCK	SP_PIR_KEYWORDS	nucleotide-binding	2.3116612888207482E-6	P41279, P29317, Q99996, P06239, Q71U36, Q15208, Q8N4C8, P30520, Q8WUD1, P62195, Q9Y4I1, P10721, P61106, O15530, P68366, P11217, Q9UPY3
LCK	SP_PIR_KEYWORDS	membrane	9.707265212299057E-6	O14763, P29317, P06239, Q9Y3P8, Q8WUD1, P16157, P18433, Q5SZK8, O75674, P61106, O15530, Q8IW00, Q9BYB0, Q7L591, Q8WU20, P50281, Q07157, O60242, Q12913, Q9UGN4, Q9NR96, P10721, Q9NT99, Q8N1I0, P08908, O43451, O76090, Q9Y666, Q8NFY4, P57737, Q6IFG1, Q9UHW9
LCK	GOTERM_CC_FAT	GO:0005886~plasma membrane	1.7680982737968134E-5	O14763, P29317, P06239, Q9Y3P8, Q8WUD1, P16157, P18433, Q5SZK8, P61106, O15530, Q8IW00, Q02410, Q9BYB0, Q7L591, Q8WU20, P50281, Q07157, O60242, Q12913, Q9UGN4, Q9NR96, P10721, P08908, O43451, O76090, Q9Y666, Q8NFY4, Q6IFG1, Q9UHW9
LCK	SP_PIR_KEYWORDS	cell membrane	6.503837753870841E-5	O60242, P06239, Q9Y3P8, Q9UGN4, Q8WUD1, Q5SZK8, Q9NT99, P61106, O43451, O76090, P08908, Q8IW00, Q9BYB0, Q8NFY4, Q6IFG1, Q7L591, Q07157
LCK	GOTERM_MF_FAT	GO:0019904~protein domain specific binding	7.005400460875854E-5	O75674, P06239, Q8N1I0, Q71U36, Q9Y3P8, Q02410, Q9BYB0, Q07157
LCK	GOTERM_MF_FAT	GO:0032553~ribonucleotide binding	7.393229709725561E-5	P41279, P29317, Q99996, P06239, Q71U36, Q15208, Q8N4C8, P30520, Q8WUD1, P62195, Q9Y4I1, P10721, P61106, O15530, P68366, P11217, Q9UPY3
LCK	GOTERM_MF_FAT	GO:0032555~purine ribonucleotide binding	7.393229709725561E-5	P41279, P29317, Q99996, P06239, Q71U36, Q15208, Q8N4C8, P30520, Q8WUD1, P62195, Q9Y4I1, P10721, P61106, O15530, P68366, P11217, Q9UPY3
LCK	GOTERM_MF_FAT	GO:0017076~purine nucleotide binding	1.2596168724527665E-4	P41279, P29317, Q99996, P06239, Q71U36, Q15208, Q8N4C8, P30520, Q8WUD1, P62195, Q9Y4I1, P10721, P61106, O15530, P68366, P11217, Q9UPY3
LCK	GOTERM_BP_FAT	GO:0007243~protein kinase cascade	2.0030396937896117E-4	P10721, O14763, Q15208, Q8N4C8, Q9BYB0, Q8WU20, O14713, Q9NR96
LCP2	GOTERM_CC_FAT	GO:0005829~cytosol	4.5100249015258245E-17	P07437, P04350, P60953, Q6VY07, Q99832, P68371, P61163, P56945, Q13094, O15530, P29474, P62424, P31751, P50542, P62851, P34896, Q9BXI3, P00519, P63000, Q13813, P26640, Q13480, P23921, O76090, P25445, P55957, Q9NYJ8, P02549
LCP2	INTERPRO	IPR003578:Ras small GTPase, Rho type	2.1774288790716724E-16	P62745, P17081, P60953, P15153, P61586, P60763, P08134, Q9HBH0, P63000
LCP2	SMART	SM00174:RHO	4.606926338981963E-16	P62745, P17081, P60953, P15153, P61586, P60763, P08134, Q9HBH0, P63000
LCP2	SP_PIR_KEYWORDS	nucleotide-binding	4.824604236399055E-12	P19784, P62745, P07437, P04350, P26196, P60953, P00519, Q9BXI3, P08134, P68371, Q99832, P63000, P61163, P26640, P23921, P17081, P11274, O15530, P15153, P61586, P31751, P60763, Q9HBH0
LCP2	GOTERM_MF_FAT	GO:0003924~GTPase activity	4.4325217429156665E-11	P62745, P04350, P07437, P17081, P60953, P15153, P61586, P60763, P08134, P68371, Q9HBH0, P63000
LCP2	UP_SEQ_FEATURE	short sequence motif:Effector region	6.164259347715261E-11	P62745, P17081, P60953, P15153, P61586, P60763, P08134, Q9HBH0, P63000
LCP2	UP_SEQ_FEATURE	nucleotide phosphate-binding region:GTP	8.119046253076618E-11	P62745, P04350, P07437, P17081, P60953, P15153, P61586, P60763, P08134, P68371, Q9HBH0, P63000
LCP2	SP_PIR_KEYWORDS	methylation	2.2612972734954825E-10	P62745, P07437, P04406, P17081, P60953, P15153, P61586, P60763, P08134, Q9HBH0, P63000
LCP2	SP_PIR_KEYWORDS	gtp-binding	2.4275740128663007E-10	P62745, P04350, P07437, P17081, P60953, P15153, P61586, P60763, P08134, P68371, Q9HBH0, P63000
LCP2	GOTERM_BP_FAT	GO:0030036~actin cytoskeleton organization	1.2795379414818484E-9	P56945, P17081, O15530, P60953, P15153, P61586, P60763, P00519, P02549, Q9HBH0, P63000
LYN	INTERPRO	IPR002452:Alpha tubulin	1.6030919676679297E-11	Q9H853, Q13748, Q71U36, P68366, Q9NY65, Q6PEY2
LYN	GOTERM_CC_FAT	GO:0005856~cytoskeleton	2.708173415081276E-9	Q99996, Q71U36, Q04695, Q6EMB2, Q8WZ42, P16157, P00519, Q9NY65, Q6PEY2, P35900, Q9H853, Q13748, P58107, Q8NF91, P68366, P29474, P02533, O75161, P07948
LYN	INTERPRO	IPR018316:Tubulin/FtsZ, 2-layer sandwich domain	3.2622133260946564E-9	Q9H853, Q13748, Q71U36, P68366, Q9NY65, Q6PEY2
LYN	INTERPRO	IPR003008:Tubulin/FtsZ, GTPase domain	5.243747508441575E-9	Q9H853, Q13748, Q71U36, P68366, Q9NY65, Q6PEY2
LYN	INTERPRO	IPR000217:Tubulin	5.243747508441575E-9	Q9H853, Q13748, Q71U36, P68366, Q9NY65, Q6PEY2
LYN	GOTERM_BP_FAT	GO:0051258~protein polymerization	3.888675220253193E-7	Q9H853, Q13748, Q71U36, P68366, Q9NY65, Q6PEY2
LYN	INTERPRO	IPR017975:Tubulin, conserved site	4.334931687387609E-7	Q13748, Q71U36, P68366, Q9NY65, Q6PEY2
LYN	GOTERM_CC_FAT	GO:0044430~cytoskeletal part	6.298285561668114E-7	Q99996, Q71U36, Q04695, Q6EMB2, Q8WZ42, Q9NY65, Q6PEY2, P35900, Q9H853, Q13748, P68366, P02533, O75161, P07948
LYN	GOTERM_MF_FAT	GO:0005198~structural molecule activity	6.304052441278564E-7	Q71U36, Q04695, Q8WZ42, P16157, Q9NY65, Q6PEY2, P35900, Q9H853, Q13748, P58107, P68366, P02533, O75161
LYN	PIR_SUPERFAMILY	PIRSF002306:tubulin	7.130031079687502E-7	Q13748, Q71U36, P68366, Q9NY65, Q6PEY2
MATK	SP_PIR_KEYWORDS	phosphoprotein	2.0214850983844537E-7	P56715, Q9NPI6, Q9UGI8, Q9NR09, O95248, P42224, P62750, Q8WZ42, Q9UQB3, P35221, Q6R327, P61106, Q8NHL6, O75914, Q14258, O75575, Q9BZ29, O15297, P78324, O75643, Q9Y2E6, Q9Y2X3, Q6PL18, Q9C0B9, Q99708, Q9BUQ8, P09884, Q14511, Q14517, Q7Z6E9, Q92499, O76090,
MATK	UP_SEQ_FEATURE	nucleotide phosphate-binding region:ATP	1.6275681884983463E-4	Q92499, P60891, Q9UNY4, O75643, Q8WZ42, Q6PL18, Q9BUQ8, P42679, P21860, O75914, O14647
MATK	GOTERM_BP_FAT	GO:0000245~spliceosome assembly	1.7032395932703047E-4	P62314, Q92499, O75643, Q9BUQ8
MATK	GOTERM_CC_FAT	GO:0030529~ribonucleoprotein complex	1.94024934477636E-4	Q9NPI6, P62314, Q92499, Q9UNY4, P62750, P62424, O75643, Q9Y2X3, Q9BUQ8
MATK	INTERPRO	IPR014021:Helicase, superfamily 1 and 2, ATP-binding	2.728786860412428E-4	Q92499, Q9UNY4, O75643, Q9BUQ8, O14647
MATK	INTERPRO	IPR001650:DNA/RNA helicase, C-terminal	2.728786860412428E-4	Q92499, Q9UNY4, O75643, Q9BUQ8, O14647
MATK	INTERPRO	IPR014001:DEAD-like helicase, N-terminal	2.929045917643171E-4	Q92499, Q9UNY4, O75643, Q9BUQ8, O14647
MATK	GOTERM_MF_FAT	GO:0070035~purine NTP-dependent helicase activity	3.005845342673565E-4	Q92499, Q9UNY4, O75643, Q9BUQ8, O14647
MATK	GOTERM_MF_FAT	GO:0008026~ATP-dependent helicase activity	3.005845342673565E-4	Q92499, Q9UNY4, O75643, Q9BUQ8, O14647
MATK	GOTERM_BP_FAT	GO:0022613~ribonucleoprotein complex biogenesis	3.476019869387032E-4	P62314, Q92499, P62424, O75643, Q9Y2X3, Q9BUQ8
MIST	SP_PIR_KEYWORDS	phosphoprotein	5.506124546509751E-7	O75815, Q13596, Q9NQS1, Q9Y6W5, Q9NWQ8, P23743, Q9H4M9, Q63HR2, Q9UJX2, O15075, P61106, P11142, O95477, Q6IA17, O94856, O95714, O75381, Q86UK7, Q7Z7G1, Q92990, Q8IZP0, O43561, Q9ULL1, O75900, P26640, Q9BW91, Q9UIW2, P09211, Q6ZVM7, Q9P2F8, P32248, O43914,
MIST	GOTERM_BP_FAT	GO:0046907~intracellular transport	9.35460125629776E-6	O15075, Q13596, P11142, P61106, O95477, Q6ZVM7, P27797, Q9Y6W5, O95714, O75381, Q9H4M9
MIST	GOTERM_BP_FAT	GO:0016197~endosome transport	2.014052555112451E-5	O15075, Q13596, P61106, O95477, Q9H4M9
MIST	GOTERM_BP_FAT	GO:0007242~intracellular signaling cascade	2.1190547120488622E-5	O75815, Q7Z7G1, P27797, Q9Y6W5, Q9NWQ8, P23743, O43561, Q63HR2, O15075, P40145, P61106, O95477, A6NK59, O43914
MIST	GOTERM_CC_FAT	GO:0005886~plasma membrane	3.085054461290374E-5	Q13596, Q12836, P27797, Q8IZP0, Q9NWQ8, P23743, O43561, Q63HR2, Q9H4M9, O15075, P40145, Q9UIW2, P61106, O95477, O94856, P32248, O43914, O75381, Q00013, Q01638
MIST	GOTERM_CC_FAT	GO:0044459~plasma membrane part	3.255174840526469E-4	Q13596, P27797, Q8IZP0, O43561, Q9H4M9, Q63HR2, O15075, P61106, O95477, P32248, O43914, O75381, Q00013, Q01638
MIST	GOTERM_CC_FAT	GO:0005769~early endosome	8.24543292580004E-4	Q13596, P61106, Q9Y6W5, Q9H4M9
MIST	GOTERM_BP_FAT	GO:0016192~vesicle-mediated transport	9.762810007903271E-4	O15075, Q13596, P11142, P61106, O95477, Q9Y6W5, O43561, Q9H4M9
MIST	GOTERM_CC_FAT	GO:0005624~membrane fraction	0.00145147	P40145, Q9UIW2, P61106, O95477, Q9NQS1, P27797, Q8IZP0, Q00013
MIST	GOTERM_CC_FAT	GO:0005626~insoluble fraction	0.00179258	P40145, Q9UIW2, P61106, O95477, Q9NQS1, P27797, Q8IZP0, Q00013
NCK1	SP_PIR_KEYWORDS	phosphoprotein	3.746822666903292E-8	Q9UK59, Q8WZ42, Q8WXG6, P82094, P05093, O15013, Q9HC35, Q9HCE6, O75674, P46109, P43490, P56945, Q16644, Q9H792, O60496, Q08188, Q12769, P27695, Q9NQ75, Q8N6F7, Q14511, Q9NP74, Q99704, P52948, O60341, Q5TCZ1, Q8IZD4, Q13480, Q5EBL8, O43281, Q9Y620, Q9P219,
NCK1	SP_PIR_KEYWORDS	sh3 domain	6.862654704882898E-6	P46109, P56945, O43281, Q9NQ75, P16333, Q14511, Q5TCZ1
NCK1	INTERPRO	IPR001452:Src homology-3 domain	7.988907189889374E-6	P46109, P56945, O43281, Q9NQ75, P16333, Q14511, Q5TCZ1
NCK1	SMART	SM00326:SH3	1.4689167229069469E-5	P46109, P56945, O43281, Q9NQ75, P16333, Q14511, Q5TCZ1
NCK1	UP_SEQ_FEATURE	region of interest:Divergent helix-loop-helix motif	1.4810932880163265E-5	P56945, O43281, Q14511
NCK1	INTERPRO	IPR014928:Serine rich protein interaction	1.517779180291399E-5	P56945, Q9NQ75, Q14511
NCK1	SP_PIR_KEYWORDS	cytoplasm	3.6821536558800556E-5	Q15283, Q8WZ42, Q9NQ75, Q8N6F7, P82094, Q14511, Q9HC35, Q9NP74, Q99704, Q8IZD4, Q5TCZ1, Q9HCE6, P56945, P43490, Q16644, P16050, Q96LI5, P16333, P49720, O60784
NCK1	UP_SEQ_FEATURE	compositionally biased region:Ser-rich	4.128445480329978E-5	P56945, Q9H792, Q8WZ42, Q9NQ75, Q8WXG6, O15013, Q9UL54, Q5TCZ1
NCK1	SP_PIR_KEYWORDS	acetylation	9.905880752294092E-5	P27695, Q9UK59, Q8TDN6, Q15283, P82094, Q99704, Q92833, P52948, Q8IZD4, P56945, Q16644, P60891, P16333, O60488, P49720, O60784, Q08188
NCK1	GOTERM_CC_FAT	GO:0005829~cytosol	0.00108506	Q9HCE6, Q13480, O75674, P43490, P56945, Q5EBL8, Q16644, P60891, Q8WZ42, P16050, O60784
NCK2	SP_PIR_KEYWORDS	phosphoprotein	1.574564754237465E-11	Q16531, O43639, Q3MJ16, Q8WZ42, Q8WXG6, P05093, Q8IU60, Q9HC35, Q13671, Q9HCE6, P46109, P43490, P56945, P42684, Q16644, Q9H792, Q92625, P23497, O60496, O00401, Q13131, P27695, Q9NQ75, P00519, Q14511, Q99704, P38646, Q5TCZ1, Q8IZD4, Q13480, Q9NZ63, Q5EBL8,
NCK2	SP_PIR_KEYWORDS	cytoplasm	1.6741309631457872E-10	Q16531, Q3MJ16, O43639, Q8WZ42, Q8IU60, Q9HC35, Q9HCE6, Q13671, P56945, P43490, P42684, Q16644, Q92625, Q96LI5, O00401, Q9NQ75, Q14511, P00519, Q99704, Q8IZD4, Q5TCZ1, O75563, P16050, P62191, P04792, O60784, Q16181
NCK2	SP_PIR_KEYWORDS	sh3 domain	2.691708988374749E-8	P46109, O43639, P56945, P42684, Q9NQ75, O75563, P00519, Q14511, Q5TCZ1
NCK2	INTERPRO	IPR001452:Src homology-3 domain	7.474281960652019E-8	P46109, O43639, P56945, P42684, Q9NQ75, O75563, P00519, Q14511, Q5TCZ1
NCK2	SMART	SM00326:SH3	2.2604998637075558E-7	P46109, O43639, P56945, P42684, Q9NQ75, O75563, P00519, Q14511, Q5TCZ1
NCK2	GOTERM_BP_FAT	GO:0007015~actin filament organization	2.111559313957486E-6	O43639, P56945, P42684, Q8WZ42, Q14511, O00401
NCK2	SP_PIR_KEYWORDS	kinase	3.296332324165468E-6	Q13131, P42684, Q16644, P60891, Q9H792, P54646, Q8WZ42, Q8WXG6, P00519, Q99704, Q9UL54
NCK2	GOTERM_BP_FAT	GO:0030036~actin cytoskeleton organization	3.859845050037973E-6	O43639, P56945, P42684, Q8WZ42, P00519, Q14511, Q9UL54, O00401
NCK2	GOTERM_BP_FAT	GO:0030029~actin filament-based process	5.894793176869259E-6	O43639, P56945, P42684, Q8WZ42, P00519, Q14511, Q9UL54, O00401
NCK2	SP_PIR_KEYWORDS	magnesium	7.460546430116862E-6	Q13131, P27695, P42684, P60891, P54646, Q8WZ42, P00519, Q9UL54, O60488
PTK6	SP_PIR_KEYWORDS	phosphoprotein	1.7656575764223692E-8	P56715, Q9NPI6, Q9UPN6, Q9UK59, P29317, Q8IXJ6, Q13882, P21675, Q9UPR0, Q96P31, Q96PY6, P42681, Q02763, P56945, P33151, O15530, P29474, P40259, Q8WU20, P08758, Q13131, P27695, Q9C0B5, Q92917, Q86T24, Q14511, P10721, Q92734, P03372, Q9HBB8, P36871, Q14204,
PTK6	SP_PIR_KEYWORDS	tyrosine-protein kinase	1.9030111467679147E-7	P10721, Q96PY6, Q92734, Q02763, P42681, P29317, Q13882
PTK6	GOTERM_MF_FAT	GO:0004672~protein kinase activity	4.3256945474954284E-7	P10721, P30876, Q13131, Q96PY6, Q92734, Q02763, P42681, P29317, Q13882, O15530, P21675, O15164
PTK6	GOTERM_BP_FAT	GO:0006468~protein amino acid phosphorylation	2.402509244059542E-6	P10721, Q13131, Q96PY6, Q92734, Q02763, P42681, P29317, Q13882, O15530, P21675, O15164, Q8WU20
PTK6	SP_PIR_KEYWORDS	atp-binding	5.170811550751227E-6	Q13131, P29317, Q13882, P21675, Q99832, Q96PY6, P10721, P42681, Q92734, Q02763, O15530, Q14204, Q9UJV9, O60488
PTK6	INTERPRO	IPR008266:Tyrosine protein kinase, active site	5.472650552809237E-6	P10721, Q92734, Q02763, P42681, P29317, Q13882
PTK6	GOTERM_MF_FAT	GO:0004713~protein tyrosine kinase activity	5.657935638187757E-6	P10721, Q96PY6, Q92734, Q02763, P42681, P29317, Q13882
PTK6	GOTERM_MF_FAT	GO:0001882~nucleoside binding	1.0414502566541504E-5	Q13131, P29317, Q13882, P21675, Q99832, Q96PY6, P30876, P10721, P42681, Q92734, Q02763, O15530, Q14204, P29474, Q9UJV9, O60488
PTK6	GOTERM_BP_FAT	GO:0016310~phosphorylation	1.3712230977731201E-5	P10721, Q13131, Q96PY6, Q92734, Q02763, P42681, P29317, Q13882, O15530, P21675, O15164, Q8WU20
PTK6	INTERPRO	IPR001245:Tyrosine protein kinase	1.4260824073511682E-5	P10721, Q92734, Q02763, P42681, P29317, Q13882
SH2B	SP_PIR_KEYWORDS	cytoplasm	3.0517126844297296E-15	Q9NYB9, Q13045, Q13043, Q8TE02, Q8WZ42, Q9H467, P27797, P08865, O95954, Q9NRM7, P42681, Q86WV1, Q9NRF2, O15530, Q8WXH0, Q9BZI7, Q06124, P50542, P61978, Q9H4G0, P52298, Q9BX66, P40337, P41252, P21333, Q13813, O75874, P57737, O75563, Q96JZ2, O94921, O15117,
SH2B	GOTERM_CC_FAT	GO:0005829~cytosol	1.9060821727174276E-10	Q9NYB9, Q9H4G0, P52298, Q8WZ42, Q9BX66, P41252, P40337, P27797, P21333, Q14008, P08865, Q13813, O15530, P14625, O75874, Q06124, P57737, P50542, O94921, P55957, P02549
SH2B	SP_PIR_KEYWORDS	phosphoprotein	1.203326388539984E-9	Q9NYB9, Q13045, Q13043, Q8WZ42, Q9H3S7, P40692, P08865, O95954, Q9NRM7, P42681, Q86WV1, Q9NRF2, O15530, P14625, Q8WXH0, P32239, Q9BZI7, Q06124, P61978, Q9H4G0, P78324, P52298, Q9BX66, P41252, P21333, Q14008, Q13813, Q15746, Q9P2N2, P57737, O75563, A0MZ66,
SH2B	GOTERM_MF_FAT	GO:0003779~actin binding	9.445103653428128E-7	Q13045, Q9H4G0, Q15746, Q8WXH0, Q8WZ42, Q9BX66, P63316, P21333, P02549, Q13813
SH2B	SP_PIR_KEYWORDS	sh3 domain	1.122142350222717E-6	Q9NYB9, P42681, Q86WV1, Q9BX66, O75563, O15117, P02549, Q13813
SH2B	INTERPRO	IPR001452:Src homology-3 domain	2.7567150726927343E-6	Q9NYB9, P42681, Q86WV1, Q9BX66, O75563, O15117, P02549, Q13813
SH2B	GOTERM_MF_FAT	GO:0008092~cytoskeletal protein binding	4.2937680089715894E-6	Q9NYB9, Q13045, Q9H4G0, Q15746, Q8WXH0, Q8WZ42, Q9BX66, P63316, P21333, P02549, Q13813
SH2B	UP_SEQ_FEATURE	domain:SH3	6.567274480988289E-6	Q9NYB9, P42681, Q86WV1, O75563, O15117, P02549, Q13813
SH2B	GOTERM_BP_FAT	GO:0030036~actin cytoskeleton organization	1.0177291376826553E-5	Q9NYB9, Q9H4G0, O15530, Q8WZ42, Q9BX66, P27797, P21333, P02549
SH2B	GOTERM_BP_FAT	GO:0007010~cytoskeleton organization	1.3185000196743057E-5	Q9NYB9, Q9H4G0, O15530, Q8WZ42, Q9BX66, P27797, P40692, P21333, Q14008, P02549
SH2D1A	SP_PIR_KEYWORDS	cytoplasm	2.7584583954215663E-11	Q92608, Q9NYT0, Q9BX97, P08263, Q9UMZ2, Q9HC16, P11586, O60870, P42680, Q8NF91, Q4KWH8, Q6ZMW3, Q9Y4P1, Q96GR2, O43312, O00401, Q8IZT6, Q9UFH2, O60880, P34896, Q14511, O75369, Q5TCZ1, P50395, O95922, Q8IZW8, Q14764, P31150, P60484
SH2D1A	GOTERM_CC_FAT	GO:0005856~cytoskeleton	1.5547164949642055E-7	Q92608, Q8IZT6, Q9NYT0, Q9Y6G9, Q9UFH2, P06746, Q14511, O75369, P78536, Q5TCZ1, O95922, Q8NF91, Q6ZMW3, Q9Y4P1, Q8IZW8, Q96AC6, O43312, O00401, Q12959
SH2D1A	SP_PIR_KEYWORDS	cytoskeleton	2.3609568936960383E-5	Q92608, Q9NYT0, O95922, Q8NF91, Q9UFH2, Q8IZW8, O43312, Q14511, O75369, O00401
SH2D1A	GOTERM_CC_FAT	GO:0043228~non-membrane-bounded organelle	2.6503608339992882E-5	Q92608, Q8IZT6, Q9NYT0, Q9Y6G9, Q9UFH2, P06746, Q14511, Q9HC16, O75369, Q5TCZ1, P78536, P10721, O95922, Q8NF91, Q6ZMW3, Q9Y4P1, Q8IZW8, Q96AC6, O43312, O00401, Q12959
SH2D1A	GOTERM_CC_FAT	GO:0043232~intracellular non-membrane-bounded organelle	2.6503608339992882E-5	Q92608, Q8IZT6, Q9NYT0, Q9Y6G9, Q9UFH2, P06746, Q14511, Q9HC16, O75369, Q5TCZ1, P78536, P10721, O95922, Q8NF91, Q6ZMW3, Q9Y4P1, Q8IZW8, Q96AC6, O43312, O00401, Q12959
SH2D1A	SP_PIR_KEYWORDS	phosphoprotein	4.56264297332901E-5	Q92608, P20963, Q9Y6G9, Q9NYT0, Q9UMZ2, Q92796, P11586, Q8N357, P42680, Q8NF91, Q4KWH8, Q9Y4P1, Q96GR2, O43312, O00401, Q8IZT6, P51812, P34896, Q14511, O75369, Q5TCZ1, Q7Z3G6, P78536, P10721, P50395, Q13322, Q9BY44, Q8IZW8, Q14764, P31150, P60484, Q86Y07,
SH2D1A	GOTERM_BP_FAT	GO:0030036~actin cytoskeleton organization	8.446742624754728E-5	Q92608, Q9NYT0, O43312, Q14511, O75369, O00401, Q12959
SH2D1A	GOTERM_BP_FAT	GO:0030029~actin filament-based process	1.2028602214704308E-4	Q92608, Q9NYT0, O43312, Q14511, O75369, O00401, Q12959
SH2D1A	SP_PIR_KEYWORDS	sh3 domain	1.7287807509861521E-4	P42680, Q92608, Q92796, Q14511, Q5TCZ1, Q12959
SH2D1A	INTERPRO	IPR001452:Src homology-3 domain	3.5698162948553166E-4	P42680, Q92608, Q92796, Q14511, Q5TCZ1, Q12959
SH2D2A	SP_PIR_KEYWORDS	cytoplasm	1.2667071464437572E-9	P42224, Q8IXJ6, P13533, P08865, O96028, P42681, P56945, Q9NQ94, Q6GYQ0, O15530, P29474, P27708, Q13615, P52292, Q7L591, Q9NP31, Q9BVQ7, Q8N7A1, Q68CZ1, Q14511, Q86T24, P49454, Q8IZD4, Q96PU9, Q6PIY7, Q8WWQ8, Q14204, Q8N556
SH2D2A	SP_PIR_KEYWORDS	phosphoprotein	3.342462745335632E-6	Q9Y6G9, P42224, Q8IXJ6, P08865, O96028, Q03135, Q96PY6, P42681, P56945, Q6GYQ0, O15530, Q9H792, P29474, P27708, Q13615, P52292, Q7L591, Q9NP31, Q07157, Q13077, Q9C0B9, Q86T24, Q14511, Q96RT1, P49454, Q8IZD4, P10721, Q6PIY7, Q14204, P09211, Q8WWQ8, Q8N556,
SH2D2A	GOTERM_CC_FAT	GO:0030055~cell-substrate junction	9.21491003317051E-6	P56945, Q8N556, P13533, Q14511, Q96RT1, Q03135
SH2D2A	GOTERM_CC_FAT	GO:0016323~basolateral plasma membrane	1.1542782390606402E-5	P56945, Q8N556, P13533, Q14511, Q96RT1, Q03135, Q07157
SH2D2A	UP_SEQ_FEATURE	region of interest:Divergent helix-loop-helix motif	1.849813303722808E-5	P56945, O43281, Q14511
SH2D2A	GOTERM_CC_FAT	GO:0005912~adherens junction	4.4348635638188395E-5	P56945, Q8N556, P13533, Q14511, Q03135, Q07157
SH2D2A	GOTERM_CC_FAT	GO:0070161~anchoring junction	7.280539630385126E-5	P56945, Q8N556, P13533, Q14511, Q03135, Q07157
SH2D2A	SP_PIR_KEYWORDS	atp-binding	7.456473927534764E-5	Q9Y6G9, P13533, Q8N0W3, Q96PY6, P10721, P42681, Q6PIY7, O15530, Q9H792, Q14204, P27708, Q07912, Q9BVQ7
SH2D2A	UP_SEQ_FEATURE	domain:SH3	7.983529389855447E-5	P42681, P56945, O43281, Q07912, Q14511, Q07157
SH2D2A	GOTERM_CC_FAT	GO:0005925~focal adhesion	1.3091873904388536E-4	P56945, Q8N556, P13533, Q14511, Q03135
SH2D3C	SP_PIR_KEYWORDS	phosphoprotein	1.0482783971872952E-7	Q9NR09, Q9Y6G9, Q8IXJ6, P23443, Q8N5H7, Q02790, P17931, Q96PY6, Q96BJ8, P42681, P56945, Q6GYQ0, O15530, P29474, Q7L591, O43312, Q9UJU6, Q07157, P27695, Q9UQC2, Q12888, Q9C0B9, Q14511, Q96RT1, Q8IZD4, O95487, Q6PIY7, Q9NZ63, P03372, Q13459, Q14204, Q05397,
SH2D3C	SP_PIR_KEYWORDS	cytoplasm	1.334199725450638E-7	Q9UQC2, Q8IXJ6, P23443, Q8N5H7, Q02790, Q14511, Q8IZD4, O95487, Q6PIY7, Q96PU9, P42681, Q96BJ8, P56945, Q9NQ94, Q13459, Q6GYQ0, O15530, Q14204, P29474, O75161, Q7L591, O43312, P04792, Q9UJU6
SH2D3C	UP_SEQ_FEATURE	region of interest:Divergent helix-loop-helix motif	1.551567335622604E-5	P56945, O43281, Q14511
SH2D3C	GOTERM_CC_FAT	GO:0031252~cell leading edge	3.412824351747428E-5	P56945, Q13459, Q05397, O43312, Q14511, Q9UJU6
SH2D3C	GOTERM_BP_FAT	GO:0007010~cytoskeleton organization	4.916137608511826E-5	P56945, Q13459, O15530, Q14204, Q05397, O75161, O43312, Q14511, Q96RT1
SH2D3C	UP_SEQ_FEATURE	domain:SH3	5.217136027883346E-5	P42681, P56945, O43281, Q14511, Q07157, Q9UJU6
SH2D3C	GOTERM_BP_FAT	GO:0007229~integrin-mediated signaling pathway	6.343115425580465E-5	Q9UQC2, P56945, Q05397, Q14511, Q96RT1
SH2D3C	GOTERM_CC_FAT	GO:0042995~cell projection	7.935820208449415E-5	Q96PU9, P03372, P56945, Q13459, Q05397, O75161, O43312, Q14511, P78509, Q9UJU6
SH2D3C	SP_PIR_KEYWORDS	sh3 domain	1.1359352927746588E-4	P42681, P56945, O43281, Q14511, Q07157, Q9UJU6
SH2D3C	GOTERM_CC_FAT	GO:0005856~cytoskeleton	1.8747570113781942E-4	P27695, Q9Y6G9, Q8IXJ6, Q14511, Q96BJ8, Q13459, Q05397, Q14204, P29474, O75161, O43312, P04792, Q9UJU6
SHC1	SP_PIR_KEYWORDS	phosphoprotein	1.7486707568063911E-6	O14745, Q96A65, Q9P244, Q14997, Q9UMX0, P31943, Q9NTJ3, Q6T4R5, Q8IWA0, Q08378, O15530, Q02410, O60716, O75083, Q08357, Q9P258, O95714, P23396, Q9HB21, P29353, P06400, Q9NRR5, O15297, Q03001, O75643, Q15751, O43150, Q9NT99, P50395, P55795, Q15746, Q53EL6,
SHC1	SP_PIR_KEYWORDS	acetylation	2.6212094275933305E-6	P06400, Q96A65, O14745, Q9NRR5, O75643, P27797, Q9UMX0, P31943, Q9NTJ3, Q8IWA0, Q08378, P55795, P50395, O15530, P48147, O75083, P25705, Q9UHD9, Q9P258, P23396, O43747
SHC1	SP_PIR_KEYWORDS	cytoplasm	6.618311747066933E-6	Q969K4, P20929, Q9NRR5, Q03001, Q15751, P27797, Q9UMX0, O43150, Q9NTJ3, Q08378, P55795, P50395, O15530, O60716, P48147, O75083, Q53EL6, Q9UHD9, Q9P258, P23396, Q9HB21, P29353, Q7Z6J0
SHC1	INTERPRO	IPR015604:Clathrin adaptor AP1, sigma subunit	2.333040454538824E-5	P56377, Q96PC3, P61966
SHC1	UP_SEQ_FEATURE	repeat:1-2	3.949630369830175E-5	P55795, Q15746, P27797, P31943
SHC1	UP_SEQ_FEATURE	repeat:1-1	4.435327116926768E-5	P55795, Q15746, P27797, P31943
SHC1	UP_SEQ_FEATURE	repeat:2-2	4.435327116926768E-5	P55795, Q15746, P27797, P31943
SHC1	SP_PIR_KEYWORDS	golgi apparatus	1.0850777814361407E-4	Q08378, P56377, Q15751, O43150, Q9BT67, Q96PC3, O43747, P61966, Q7Z6J0
SHC1	INTERPRO	IPR015496:Ubiquilin	1.1602309761187154E-4	Q9NRR5, Q9UHD9, Q9UMX0
SHC1	GOTERM_CC_FAT	GO:0030131~clathrin adaptor complex	1.3063949785935546E-4	P56377, Q96PC3, O43747, P61966
SHC3	GOTERM_CC_FAT	GO:0005829~cytosol	7.736116704526117E-15	P09467, P60709, P08865, Q9HC96, O15530, P43403, P48147, P29474, O75083, Q96PC3, P23396, O43747, P21333, P00519, P35579, Q13813, P62314, O76090, Q14204, P56377, P57737, Q9NSD9, P63261, Q10567, P02549, Q99570, P61966
SHC3	SP_PIR_KEYWORDS	acetylation	2.4176805589050377E-10	P62736, P09467, P34932, P60709, P08865, O95831, O15530, P43403, P48147, O75083, P68032, Q9P258, P23396, O43747, P21333, P35579, Q13813, P09211, Q14204, P57737, Q9NSD9, P63261, P68133, Q10567, Q01804, P63267
SHC3	SP_PIR_KEYWORDS	atp-binding	4.337553060783004E-10	P62736, P34932, P60709, P00519, P35579, Q9UBJ2, Q9NRM7, P40145, Q15746, O15530, Q14204, P43403, Q9NSD9, P43405, P63261, P68032, P68133, Q9UPY3, P63267, Q99570
SHC3	SP_PIR_KEYWORDS	cytoskeleton	6.762991822971916E-10	P62736, P20929, P60709, P21333, P00519, Q13813, Q9NRM7, P29474, O75083, P68032, P63261, P68133, Q9P258, P02549, P63267
SHC3	INTERPRO	IPR004001:Actin, conserved site	9.36194709724044E-10	P62736, P68032, P63261, P68133, P60709, P63267
SHC3	SP_PIR_KEYWORDS	methylated amino acid	1.6117075320777637E-9	P62736, P68032, P63261, P68133, P60709, P63267
SHC3	GOTERM_MF_FAT	GO:0030554~adenyl nucleotide binding	4.496978937924039E-9	P62736, P34932, P60709, P00519, P35579, Q9UBJ2, O95831, Q9NRM7, P40145, Q15746, O15530, Q14204, P43403, P29474, Q9NSD9, P43405, P63261, P68032, P68133, Q9UPY3, P63267, Q99570
SHC3	PIR_SUPERFAMILY	PIRSF002337:Actin	5.511288837724435E-9	P62736, P68032, P63261, P68133, P60709, P63267
SHC3	GOTERM_MF_FAT	GO:0001883~purine nucleoside binding	5.978517585578572E-9	P62736, P34932, P60709, P00519, P35579, Q9UBJ2, O95831, Q9NRM7, P40145, Q15746, O15530, Q14204, P43403, P29474, Q9NSD9, P43405, P63261, P68032, P68133, Q9UPY3, P63267, Q99570
SHC3	GOTERM_MF_FAT	GO:0001882~nucleoside binding	6.8003676262993765E-9	P62736, P34932, P60709, P00519, P35579, Q9UBJ2, O95831, Q9NRM7, P40145, Q15746, O15530, Q14204, P43403, P29474, Q9NSD9, P43405, P63261, P68032, P68133, Q9UPY3, P63267, Q99570
SOCS2	UP_SEQ_FEATURE	region of interest:Linker 12	4.463835851274225E-14	P35900, P08729, Q04695, P08670, P13647, P14136, P02533, P05787, P35908, P17661
SOCS2	UP_SEQ_FEATURE	region of interest:Coil 1B	1.0415677776552802E-13	P35900, P08729, Q04695, P08670, P13647, P14136, P02533, P05787, P35908, P17661
SOCS2	UP_SEQ_FEATURE	region of interest:Coil 1A	1.0415677776552802E-13	P35900, P08729, Q04695, P08670, P13647, P14136, P02533, P05787, P35908, P17661
SOCS2	UP_SEQ_FEATURE	region of interest:Linker 1	1.0415677776552802E-13	P35900, P08729, Q04695, P08670, P13647, P14136, P02533, P05787, P35908, P17661
SOCS2	UP_SEQ_FEATURE	region of interest:Rod	1.1906380800779917E-13	P35900, P08729, Q04695, P08670, P13647, P14136, P02533, P05787, P35908, P17661
SOCS2	UP_SEQ_FEATURE	region of interest:Head	1.545535833536874E-13	P35900, P08729, Q04695, P08670, P13647, P14136, P02533, P05787, P35908, P17661
SOCS2	UP_SEQ_FEATURE	region of interest:Tail	1.9921842194527484E-13	P35900, P08729, Q04695, P08670, P13647, P14136, P02533, P05787, P35908, P17661
SOCS2	SP_PIR_KEYWORDS	Intermediate filament	2.718712132020213E-13	P35900, P08729, Q04695, P08670, P13647, P14136, P02533, P05787, P35908, P17661
SOCS2	INTERPRO	IPR018039:Intermediate filament protein, conserved site	3.7493514481711887E-13	P35900, P08729, Q04695, P08670, P13647, P14136, P02533, P05787, P35908, P17661
SOCS2	INTERPRO	IPR016044:Filament	3.7493514481711887E-13	P35900, P08729, Q04695, P08670, P13647, P14136, P02533, P05787, P35908, P17661
SOCS5	SP_PIR_KEYWORDS	phosphoprotein	3.6979919645172743E-9	Q8WVD3, Q9P227, Q9NWQ8, Q9Y4G8, Q9H4M9, Q63HR2, Q9UJX2, P61106, P11142, Q8NI35, P08758, Q9H000, Q7Z7G1, Q92990, O60347, Q9Y3Z3, P13521, Q8ND30, Q92738, O43561, Q8WV28, O95196, O15211, P09211, Q92529, P14317, Q9GZY6, Q6S5L8, Q9P2F8, Q9BZL6, Q9Y566, P32248,
SOCS5	GOTERM_BP_FAT	GO:0007242~intracellular signaling cascade	6.692013386509058E-9	Q7Z7G1, P13521, Q9Y4G8, Q9NWQ8, O43561, Q63HR2, O75159, Q8WV28, P61106, O15211, Q92828, P14317, Q9GZY6, Q92529, Q6S5L8, Q9BZL6, Q8NI35, O43914
SOCS5	UP_SEQ_FEATURE	domain:SH2	1.8689323420859832E-6	Q7Z7G1, Q92529, Q6S5L8, Q63HR2, Q8WV28, O75159
SOCS5	SP_PIR_KEYWORDS	SH2 domain	3.711557515564668E-6	Q7Z7G1, Q92529, Q6S5L8, Q63HR2, Q8WV28, O75159
SOCS5	INTERPRO	IPR000980:SH2 motif	5.052741337082386E-6	Q7Z7G1, Q92529, Q6S5L8, Q63HR2, Q8WV28, O75159
SOCS5	SMART	SM00252:SH2	2.3450514595871053E-5	Q7Z7G1, Q92529, Q6S5L8, Q63HR2, Q8WV28, O75159
SOCS5	GOTERM_CC_FAT	GO:0005886~plasma membrane	8.82039348928893E-5	Q96RK4, Q9Y4G8, Q9NWQ8, O43561, Q63HR2, Q9H4M9, Q8WV28, O95196, P61106, Q9GZY6, Q6S5L8, Q9Y566, Q8NI35, P32248, O43914, O60486
SOCS5	GOTERM_CC_FAT	GO:0044459~plasma membrane part	2.5140732674059117E-4	O95196, P61106, Q6S5L8, Q9Y566, Q96RK4, Q8NI35, P32248, Q9Y4G8, O43914, O43561, Q63HR2, Q9H4M9
SOCS5	GOTERM_MF_FAT	GO:0005070~SH3/SH2 adaptor activity	3.0373854022886534E-4	Q7Z7G1, Q9NWQ8, O43561, Q8WV28
SOCS5	INTERPRO	IPR001478:PDZ/DHR/GLGF	3.5813241468541767E-4	Q9P227, Q9P2F8, Q9Y566, Q8NI35, Q9Y4G8
SRC	INTERPRO	IPR000533:Tropomyosin	8.962051686035798E-8	P09493, P06753, P07951, P67936
SRC	GOTERM_CC_FAT	GO:0005862~muscle thin filament tropomyosin	1.5187616192786843E-7	P09493, P06753, P07951, P67936
SRC	GOTERM_CC_FAT	GO:0005865~striated muscle thin filament	1.621508656559643E-7	P20929, P09493, P06753, P07951, P67936
SRC	PIR_SUPERFAMILY	PIRSF002327:tropomyosin	1.9392676747896139E-7	P09493, P06753, P07951, P67936
SRC	SP_PIR_KEYWORDS	cytoskeleton	5.471958277415642E-7	Q9H4X1, P20929, P09493, Q6ZV73, Q9Y6D9, Q6EMB2, P06753, P07951, P13647, P16157, P67936, Q9BZV1
SRC	SP_PIR_KEYWORDS	phosphoprotein	9.07946728842422E-7	Q9NPI6, P25788, Q8IY51, P12931, P07951, P14866, P85037, P16157, P18433, Q5T7W0, Q13017, Q6ZV73, P13647, Q9Y4K4, P09104, P04264, O43520, Q9Y3M8, Q9Y6D9, Q96ST3, Q6EMB2, Q8N4C8, Q99704, O60281, P20042, Q9H4X1, Q9NZ63, P08729, O43296, P06753, Q9Y666, P57737,
SRC	SP_PIR_KEYWORDS	acetylation	3.8083377296529967E-6	P25788, Q9Y6D9, Q96ST3, P07951, P14866, P85037, Q5T7W0, Q99704, O60281, P63173, P20042, P09493, P08729, P06753, O75874, P60891, P57737, P67936, Q13423, Q14562, O00232
SRC	SP_PIR_KEYWORDS	cytoplasm	9.892577745153764E-6	Q9NPI6, P20929, P25788, Q9Y3M8, Q9Y6D9, P18054, Q6EMB2, P07951, P14866, P16157, Q99704, Q13017, Q9H4X1, P09493, Q6ZV73, P08729, P06753, O75874, P57737, P67936, P09104, Q9Y4K4, Q9BZV1
SRC	SP_PIR_KEYWORDS	muscle protein	1.769420390255407E-5	P20929, P09493, P06753, P07951, P67936
SRC	GOTERM_CC_FAT	GO:0030017~sarcomere	2.0486509544446343E-5	P20929, P09493, P06753, P07951, P16157, P67936
TEC	SP_PIR_KEYWORDS	phosphoprotein	5.0492856774299685E-8	Q9NPI6, Q8IXJ6, P32927, P15391, P08865, Q96P31, Q9NWX6, Q0JRZ9, Q15147, P42680, Q86WV1, O75674, P27986, O15530, Q9UNS2, Q9H792, Q06124, Q7L591, Q8WU20, O94929, P15924, Q9UQ49, Q8N4C8, O14879, Q8N6F7, P09884, Q14511, P52948, Q92734, Q8N1I0, Q9H788, P21730,
TEC	UP_SEQ_FEATURE	domain:SH3	1.7493797392941797E-7	P42680, Q86WV1, P27986, Q8N1I0, O75563, O15117, O00459, Q14511
TEC	SP_PIR_KEYWORDS	sh3 domain	5.33921291117864E-7	P42680, Q86WV1, P27986, Q8N1I0, O75563, O15117, O00459, Q14511
TEC	GOTERM_MF_FAT	GO:0005158~insulin receptor binding	6.783059824675661E-7	P27986, O15530, Q06124, Q8WU20, Q7L591
TEC	INTERPRO	IPR001452:Src homology-3 domain	9.339772659269263E-7	P42680, Q86WV1, P27986, Q8N1I0, O75563, O15117, O00459, Q14511
TEC	SP_PIR_KEYWORDS	cytoplasm	5.0290944269342745E-6	Q9NPI6, O94929, P15924, Q8IXJ6, Q9H467, Q8N6F7, P08865, Q14511, Q9BXI3, Q9NWX6, P42680, Q86WV1, Q9H788, O15530, Q9UNS2, Q06124, O75161, O75563, Q7L591, O15117, Q9BVQ7, Q8N7A1
TEC	SMART	SM00326:SH3	5.773108888385178E-6	P42680, Q86WV1, P27986, Q8N1I0, O75563, O15117, O00459, Q14511
TEC	SP_PIR_KEYWORDS	SH2 domain	5.94098074898611E-6	P42680, P27986, Q9H788, Q6S5L8, Q06124, O00459
TEC	INTERPRO	IPR000980:SH2 motif	8.383558308099509E-6	P42680, P27986, Q9H788, Q6S5L8, Q06124, O00459
TEC	SMART	SM00252:SH2	3.290529131340564E-5	P42680, P27986, Q9H788, Q6S5L8, Q06124, O00459
TENC1	GOTERM_CC_FAT	GO:0005925~focal adhesion	5.328837227330596E-16	Q9UGI8, P56945, Q13153, Q05397, P08575, Q68CZ2, Q8N556, Q14289, Q9NQ75, Q14511, Q93052, Q63HR2
TENC1	GOTERM_CC_FAT	GO:0005924~cell-substrate adherens junction	8.260307076750445E-16	Q9UGI8, P56945, Q13153, Q05397, P08575, Q68CZ2, Q8N556, Q14289, Q9NQ75, Q14511, Q93052, Q63HR2
TENC1	GOTERM_CC_FAT	GO:0030055~cell-substrate junction	1.543892152301478E-15	Q9UGI8, P56945, Q13153, Q05397, P08575, Q68CZ2, Q8N556, Q14289, Q9NQ75, Q14511, Q93052, Q63HR2
TENC1	GOTERM_CC_FAT	GO:0005912~adherens junction	6.043130521364094E-14	Q9UGI8, P56945, Q13153, Q05397, P08575, Q68CZ2, Q8N556, Q14289, Q9NQ75, Q14511, Q93052, Q63HR2
TENC1	SP_PIR_KEYWORDS	phosphoprotein	1.0137719553898016E-13	Q9UGI8, Q58EX7, Q14289, Q15027, Q93052, Q9H4M9, Q63HR2, Q7Z3J3, P22105, Q02763, P61106, P56945, P15311, O15530, Q8WXH0, P08631, P51805, O95714, Q86UK7, Q13153, P08575, Q68CZ2, O60347, Q9NQ75, Q9NUY8, Q8IZP0, Q14511, Q92738, O43561, Q96RL7, Q8WV28, Q9UPU7,
TENC1	GOTERM_CC_FAT	GO:0070161~anchoring junction	1.9190765143737017E-13	Q9UGI8, P56945, Q13153, Q05397, P08575, Q68CZ2, Q8N556, Q14289, Q9NQ75, Q14511, Q93052, Q63HR2
TENC1	GOTERM_CC_FAT	GO:0016323~basolateral plasma membrane	1.1915933153132425E-12	Q9UGI8, P56945, Q13153, Q05397, P08575, Q68CZ2, Q8N556, Q14289, Q9NQ75, Q14511, Q93052, Q63HR2
TENC1	GOTERM_CC_FAT	GO:0030054~cell junction	1.861343778344403E-9	Q9UGI8, Q13153, P08575, Q14289, Q68CZ2, Q9NQ75, Q8IZP0, Q14511, Q93052, Q63HR2, P56945, Q05397, Q8N556
TENC1	GOTERM_CC_FAT	GO:0005886~plasma membrane	1.9899039209874775E-9	Q9UGI8, Q14289, Q93052, Q63HR2, Q9H4M9, Q02763, P56945, P61106, P15311, O15530, Q8WXH0, P51805, Q13153, P08575, Q68CZ2, Q9NQ75, Q8IZP0, Q14511, O43561, Q8WV28, P40145, Q9UIW2, O95196, Q05397, Q9GZY6, Q8N556, O60486
TENC1	GOTERM_CC_FAT	GO:0044459~plasma membrane part	1.0139093475945925E-7	Q9UGI8, Q13153, P08575, Q68CZ2, Q14289, Q9NQ75, Q8IZP0, Q14511, Q93052, O43561, Q63HR2, Q9H4M9, Q02763, O95196, P56945, P61106, P15311, Q05397, Q8WXH0, Q8N556
TENS1	GOTERM_CC_FAT	GO:0005925~focal adhesion	3.438683971133253E-41	Q9UHB6, Q9UGI8, Q9Y490, Q13153, P08575, Q7Z5R6, Q68CZ2, Q14289, Q15654, Q14511, Q9Y4G6, P12883, Q93052, Q63HR2, Q03135, Q9BQL6, P35609, P12814, Q9HBI0, Q05397, Q8N556, Q9Y2X7, Q96AC1
TENS1	GOTERM_CC_FAT	GO:0005924~cell-substrate adherens junction	8.830905877245526E-41	Q9UHB6, Q9UGI8, Q9Y490, Q13153, P08575, Q7Z5R6, Q68CZ2, Q14289, Q15654, Q14511, Q9Y4G6, P12883, Q93052, Q63HR2, Q03135, Q9BQL6, P35609, P12814, Q9HBI0, Q05397, Q8N556, Q9Y2X7, Q96AC1
TENS1	GOTERM_CC_FAT	GO:0030055~cell-substrate junction	3.3804598044351466E-40	Q9UHB6, Q9UGI8, Q9Y490, Q13153, P08575, Q7Z5R6, Q68CZ2, Q14289, Q15654, Q14511, Q9Y4G6, P12883, Q93052, Q63HR2, Q03135, Q9BQL6, P35609, P12814, Q9HBI0, Q05397, Q8N556, Q9Y2X7, Q96AC1
TENS1	GOTERM_CC_FAT	GO:0005912~adherens junction	2.9218666000867805E-39	Q9UHB6, Q9UGI8, Q9Y490, Q13153, Q7Z5R6, P08575, Q68CZ2, Q14289, Q15654, Q14511, Q9Y4G6, P12883, Q93052, Q63HR2, Q03135, Q9BQL6, P35609, P12814, Q9HBI0, Q05397, Q8N556, Q9Y2X7, Q9HCM4, Q96AC1
TENS1	GOTERM_CC_FAT	GO:0070161~anchoring junction	3.7874659747136247E-38	Q9UHB6, Q9UGI8, Q9Y490, Q13153, Q7Z5R6, P08575, Q68CZ2, Q14289, Q15654, Q14511, Q9Y4G6, P12883, Q93052, Q63HR2, Q03135, Q9BQL6, P35609, P12814, Q9HBI0, Q05397, Q8N556, Q9Y2X7, Q9HCM4, Q96AC1
TENS1	GOTERM_CC_FAT	GO:0016323~basolateral plasma membrane	4.292240984321367E-34	Q9UHB6, Q9UGI8, Q9Y490, Q13153, P08575, Q7Z5R6, Q68CZ2, Q14289, Q15654, Q14511, Q9Y4G6, P12883, Q93052, Q63HR2, Q03135, Q9BQL6, P35609, P12814, Q9HBI0, Q05397, Q8N556, Q9Y2X7, Q96AC1
TENS1	GOTERM_CC_FAT	GO:0030054~cell junction	9.11111106847861E-27	Q9UHB6, Q9UGI8, Q9Y490, Q13153, Q7Z5R6, P08575, Q68CZ2, Q14289, Q15654, Q14511, Q9Y4G6, P12883, Q93052, Q63HR2, Q03135, Q9BQL6, P35609, P12814, Q9HBI0, Q05397, Q8N556, Q9Y2X7, Q9HCM4, Q96AC1
TENS1	GOTERM_CC_FAT	GO:0044459~plasma membrane part	1.607857070853455E-16	Q9UHB6, Q9UGI8, Q14289, Q15654, Q9Y4G6, Q93052, Q63HR2, Q03135, P35609, P12814, Q02763, P15311, Q9HBI0, Q8WXH0, Q9Y2X7, Q9HCM4, Q96AC1, Q9Y490, Q13153, P08575, Q7Z5R6, Q68CZ2, Q14511, P12883, Q9BQL6, Q05397, Q8N556
TENS1	SP_PIR_KEYWORDS	cell junction	1.2143504710830804E-15	Q9UHB6, Q9UGI8, Q13153, Q7Z5R6, Q15654, Q68CZ2, Q14511, Q9Y4G6, Q93052, Q63HR2, Q9BQL6, Q9HBI0, Q05397, Q9HCM4, Q96AC1
TENS1	SP_PIR_KEYWORDS	cytoplasm	1.7793521414401343E-14	Q9UHB6, Q9UGI8, Q14289, Q15654, O60711, Q9Y4G6, Q93052, P35609, P12814, P15311, Q9HBI0, O15530, Q8WXH0, Q9Y2X7, P08631, Q9UGP4, Q9HCM4, Q96AC1, Q9Y490, Q13153, Q8WX93, Q7Z5R6, Q14511, P12883, Q9BQL6, Q15149, Q8N556
TNS	SP_PIR_KEYWORDS	cytoplasm	7.719166130784317E-12	P42224, Q8IXJ6, Q9H467, P52565, P52566, Q9H6S3, P08865, Q93052, Q86WV1, P42681, O15530, P29474, Q9Y4P1, Q13615, Q7L591, Q9BVQ7, Q8N7A1, P41279, Q7Z3T8, P00519, Q86T24, Q14511, O00507, Q13939, Q93008, O75112, Q14185, Q5XXA6, Q9HBL0, Q9Y4B6, Q6ZNL6
TNS	GOTERM_CC_FAT	GO:0043228~non-membrane-bounded organelle	7.049004926225075E-9	Q9Y6G9, P42224, Q8IXJ6, P52565, P52566, P08865, P00519, Q14511, Q86T24, Q9NY65, Q13939, Q6PEY2, P35579, Q9H853, P10721, P35580, Q13748, O75112, P29474, Q9Y4P1, Q9HBL0, P23497, P12004, Q6ZNL6
TNS	GOTERM_CC_FAT	GO:0043232~intracellular non-membrane-bounded organelle	7.049004926225075E-9	Q9Y6G9, P42224, Q8IXJ6, P52565, P52566, P08865, P00519, Q14511, Q86T24, Q9NY65, Q13939, Q6PEY2, P35579, Q9H853, P10721, P35580, Q13748, O75112, P29474, Q9Y4P1, Q9HBL0, P23497, P12004, Q6ZNL6
TNS	GOTERM_CC_FAT	GO:0005856~cytoskeleton	2.2919424358408314E-8	Q9Y6G9, Q8IXJ6, P52565, P52566, Q14511, P00519, Q9NY65, Q13939, Q6PEY2, P35579, Q9H853, P35580, Q13748, O75112, P29474, Q9Y4P1, Q9HBL0, Q6ZNL6
TNS	SP_PIR_KEYWORDS	phosphoprotein	3.9977201113245687E-7	Q9Y6G9, P42224, Q8IXJ6, P52566, Q15029, Q9H6S3, P08865, Q9NY65, Q6PEY2, Q93052, P42681, Q86WV1, Q02763, O15530, P29474, Q9Y4P1, Q13615, Q7L591, P23497, P41279, Q8N4C8, Q9C0B9, Q7Z3T8, P00519, Q86T24, Q14511, Q93008, P35579, P10721, P35580, Q13748, Q15746,
TNS	INTERPRO	IPR002452:Alpha tubulin	1.9840112204550316E-6	Q9H853, Q13748, Q9NY65, Q6PEY2
TNS	SP_PIR_KEYWORDS	nucleotide-binding	2.3116612888207482E-6	P41279, Q9Y6G9, Q8N4C8, Q15029, P00519, Q9NY65, Q6PEY2, P35579, P10721, Q9H853, P35580, P42681, Q02763, Q13748, Q15746, O15530, Q9BVQ7
TNS	GOTERM_CC_FAT	GO:0015630~microtubule cytoskeleton	1.2081920805704492E-5	Q9H853, P35580, Q9Y6G9, Q13748, Q8IXJ6, Q9Y4P1, Q14511, Q9NY65, Q6PEY2, P35579
TNS	INTERPRO	IPR018316:Tubulin/FtsZ, 2-layer sandwich domain	3.540722326472487E-5	Q9H853, Q13748, Q9NY65, Q6PEY2
TNS	INTERPRO	IPR000217:Tubulin	4.634297047598091E-5	Q9H853, Q13748, Q9NY65, Q6PEY2
TXK	SP_PIR_KEYWORDS	phosphoprotein	1.4811516490736386E-10	Q9NPI6, Q8IXJ6, P07333, P32927, O94875, P18433, P08865, Q5KSL6, Q96PK6, P42681, Q86WV1, P56945, O15530, Q16644, Q9H792, Q7L591, Q8WU20, Q9GZQ6, P78332, P41279, P19484, P27695, P98196, Q96ST3, Q9UQ49, Q96S55, P15941, Q14511, Q93008, Q8IZD4, Q9NT99, P54764,
TXK	SP_PIR_KEYWORDS	cytoplasm	7.35518595578368E-9	Q9NPI6, Q8IXJ6, O94875, Q9H467, P08865, Q5KSL6, Q96PK6, Q86WV1, P42681, P56945, Q16644, O15530, Q7L591, Q9BVQ7, Q8N7A1, P41279, P19484, P15941, Q14511, O00507, Q93008, Q8IZD4, Q9H788, Q14204, O75563, Q05513
TXK	UP_SEQ_FEATURE	active site:Proton acceptor	2.342861239403699E-6	P41279, P42681, P27695, P54764, O15530, P07333, Q8IXJ6, Q16644, Q9H792, Q9UQ49, Q05513
TXK	SP_PIR_KEYWORDS	atp-binding	6.81517560663015E-6	P41279, P98196, P07333, Q96S55, Q5KSL6, P42681, P54764, Q16644, O15530, Q9H792, Q14204, Q9UJV9, Q9BVQ7, Q05513
TXK	UP_SEQ_FEATURE	nucleotide phosphate-binding region:ATP	6.350915274004674E-5	P41279, P42681, P54764, O15530, P07333, Q16644, Q14204, Q9H792, Q96S55, Q9UJV9, Q05513
TXK	SP_PIR_KEYWORDS	nucleotide-binding	8.67680893319766E-5	P41279, P98196, P07333, Q96S55, Q5KSL6, P42681, P54764, Q16644, O15530, Q9H792, Q14204, Q9UJV9, Q9BVQ7, Q05513
TXK	UP_SEQ_FEATURE	domain:Protein kinase	1.0371755470622378E-4	P41279, P42681, P54764, O15530, P07333, Q16644, Q9H792, Q05513
TXK	GOTERM_BP_FAT	GO:0006468~protein amino acid phosphorylation	1.1256903457344797E-4	P41279, P42681, P54764, O15530, P07333, Q16644, Q9H792, Q8WU20, P18433, Q05513
TXK	SP_PIR_KEYWORDS	sh3 domain	1.2666726010293183E-4	P42681, Q86WV1, P56945, O94875, O75563, Q14511
TXK	GOTERM_MF_FAT	GO:0005524~ATP binding	1.2993126220477836E-4	P41279, P98196, P07333, Q96S55, Q5KSL6, P42681, P54764, Q16644, O15530, Q9H792, Q14204, Q9UJV9, Q9BVQ7, Q05513
VAV1	SP_PIR_KEYWORDS	phosphoprotein	2.4318326307782747E-12	Q9UJX4, Q9UJX5, Q9Y6G9, O75096, Q14289, Q13574, P08581, Q8NG31, Q9UP95, P15391, O15013, Q9Y333, Q96P31, Q13469, P40123, O15530, P11217, P55011, O75083, Q5TB80, Q13131, O75665, Q8N292, Q9H1K1, O60318, Q8N6F7, P05067, O43561, Q86SQ0, Q8IZD4, Q9Y4H2, Q9NT99,
VAV1	INTERPRO	IPR008154:Amyloidogenic glycoprotein, extracellular	2.1368133834871285E-5	P51693, Q06481, P05067
VAV1	INTERPRO	IPR011178:Amyloidogenic glycoprotein, copper-binding	2.1368133834871285E-5	P51693, Q06481, P05067
VAV1	INTERPRO	IPR019744:Amyloidogenic glycoprotein, extracellular domain conserved site	2.1368133834871285E-5	P51693, Q06481, P05067
VAV1	INTERPRO	IPR015849:Amyloidogenic glycoprotein, heparin-binding	2.1368133834871285E-5	P51693, Q06481, P05067
VAV1	INTERPRO	IPR008155:Amyloidogenic glycoprotein	2.1368133834871285E-5	P51693, Q06481, P05067
VAV1	INTERPRO	IPR019543:Beta-amyloid precursor protein C-terminal	2.1368133834871285E-5	P51693, Q06481, P05067
VAV1	INTERPRO	IPR019745:Amyloidogenic glycoprotein, intracellular domain, conserved site	2.1368133834871285E-5	P51693, Q06481, P05067
VAV1	GOTERM_CC_FAT	GO:0005829~cytosol	2.8217986134500096E-5	Q9UJX4, O75665, Q9UJX5, Q9H1K1, O60318, Q13469, P23921, O15530, P15498, Q14204, Q8NEB9, Q8NFP9, Q9Y2U5, O75083, P57076, P02549
VAV1	SMART	SM00006:A4_EXTRA	2.9497622519730476E-5	P51693, Q06481, P05067
VAV2	SP_PIR_KEYWORDS	phosphoprotein	4.9338766888106464E-11	Q96KP1, P23443, Q8WZ42, P17174, O14920, Q02790, Q8NG31, Q9UDY4, P00505, O76081, Q15303, P42229, P55196, Q02224, A5YKK6, P04626, P27708, P51692, O43157, Q9H0E2, Q9GZQ6, Q14980, Q9BZ29, Q9HB21, P35749, Q13131, P98196, Q9UPQ9, Q8NDV7, P52735, P34982, P52948,
VAV2	GOTERM_BP_FAT	GO:0006103~2-oxoglutarate metabolic process	4.342545612182028E-6	P51692, P17174, P00505, P42229
VAV2	GOTERM_BP_FAT	GO:0006107~oxaloacetate metabolic process	4.342545612182028E-6	P51692, P17174, P00505, P42229
VAV2	GOTERM_CC_FAT	GO:0005829~cytosol	2.8217986134500096E-5	Q9NR45, P23443, Q8WZ42, P17174, O14920, P52735, P55884, P18031, O15229, P55196, P36871, Q14204, P27708, P51692, O43747, Q14980
VAV2	GOTERM_MF_FAT	GO:0000166~nucleotide binding	7.610075771305108E-5	Q13131, P98196, Q9UPQ9, Q8NDV7, P23443, Q8WZ42, O14920, Q02790, Q15303, P55884, O15229, P10721, Q02224, P13639, Q14204, P27708, P04626, Q9Y287, Q9BZ29, P35749
VAV2	SP_PIR_KEYWORDS	polymorphism	8.90114697015494E-5	Q9NR45, Q96KP1, P23443, Q8WZ42, Q8NG31, Q02790, O14920, P00505, Q15303, P42229, P47211, Q02224, A5YKK6, Q6PRD1, P04626, P27708, P51692, O43157, Q9H0E2, Q9GZQ6, Q14980, O43747, Q9BZ29, Q9HB21, P35749, Q13131, P98196, Q9UPQ9, Q8NDV7, P52735, P34982, P52948,
VAV2	UP_SEQ_FEATURE	sequence variant	9.288240681567053E-5	Q9NR45, Q96KP1, P23443, Q8WZ42, Q8NG31, Q02790, O14920, P00505, Q15303, P42229, P47211, Q02224, A5YKK6, Q6PRD1, P04626, P27708, P51692, O43157, Q9Y287, Q9H0E2, Q9GZQ6, Q14980, O43747, Q9BZ29, Q9HB21, P35749, Q13131, P98196, Q9UPQ9, Q8NDV7, P52735, P34982,
VAV2	GOTERM_BP_FAT	GO:0007169~transmembrane receptor protein tyrosine kinase signaling pathway	1.038097761576801E-4	P10721, P04626, P51692, Q15303, P42229, Q9HB21, P18031
VAV2	GOTERM_BP_FAT	GO:0043648~dicarboxylic acid metabolic process	2.0451176658226579E-4	P51692, P17174, P00505, P42229
VAV2	KEGG_PATHWAY	hsa05221:Acute myeloid leukemia	2.1997715023918147E-4	P10721, P23443, P51692, O14920, P42229
YES1	SP_PIR_KEYWORDS	tyrosine-protein kinase	1.4329693995819201E-8	P10721, Q96PY6, P42681, P54764, P29317, Q9H792, P00519, P07947
YES1	SP_PIR_KEYWORDS	cytoplasm	1.1944451114381632E-7	Q9NPI6, Q04695, Q9H467, P28290, P08865, P42681, Q6ZV73, Q16828, Q8NF91, P02533, Q92625, Q9GZZ1, Q9Y3A5, Q9BVQ7, P07947, Q9Y3M8, Q9Y6D9, Q9NPH2, Q13501, P00519, P35900, Q9BSK4, O75874, P57737, O75563, P04792
YES1	INTERPRO	IPR008266:Tyrosine protein kinase, active site	3.8080317265439223E-7	P10721, P42681, P54764, P29317, Q9H792, P00519, P07947
YES1	GOTERM_MF_FAT	GO:0004713~protein tyrosine kinase activity	1.076781857485589E-6	P10721, Q96PY6, P42681, P54764, P29317, Q9H792, P00519, P07947
YES1	UP_SEQ_FEATURE	domain:Protein kinase	3.0627855450844688E-6	P10721, Q96PY6, P42681, P54764, P29317, Q9H792, Q7KZI7, P00519, P07947, P27448
YES1	SP_PIR_KEYWORDS	phosphoprotein	3.7103601554129934E-6	Q9NPI6, P29317, Q04695, P28290, P08865, Q96PY6, O75674, P42681, P61106, Q16828, Q6ZV73, Q8NF91, Q8TCS8, Q9H792, Q92625, Q9GZZ1, Q9Y3A5, P07947, P27695, Q9Y3M8, Q9Y6D9, Q6IQ23, Q13501, P00519, P27448, Q92736, P20042, P10721, P35900, P54764, P09211, P57737,
YES1	INTERPRO	IPR017441:Protein kinase, ATP binding site	6.083156650404226E-6	P10721, Q96PY6, P42681, P54764, P29317, Q9H792, Q7KZI7, P00519, P07947, P27448
YES1	UP_SEQ_FEATURE	active site:Proton acceptor	6.459455665942011E-6	P10721, Q96PY6, P42681, P27695, P54764, P29317, Q9H792, Q7KZI7, P00519, P07947, P27448
YES1	UP_SEQ_FEATURE	binding site:ATP	9.862811301324625E-6	P10721, Q96PY6, P42681, P54764, P29317, Q9H792, Q7KZI7, P00519, P07947, P27448
YES1	SP_PIR_KEYWORDS	kinase	6.120439686196588E-5	P10721, Q96PY6, P42681, P54764, P29317, Q9H792, Q7KZI7, P00519, P07947, P27448

## Sheet: Sheet2
Genome-wide prediction for 50 human SH2 domains. Top 50 predictions for each SH2 domains are used for DAVID analysis. DAVID functional annotation chart which identify enriched annotation terms associated with predicted proteins are reported. the smaller P-values, the more significant they are. SMALI doesn't have models for LCP2, MIST, SH2D3C, SOCS2, SOCS5 and TENS1 SH2 domains, hence, we ignore t…
SVM-top predictions (positive data) but negative predictions by SMALI
SH2 Domains	Category	Term	P-value	Proteins
ABL1	GOTERM_CC_FAT	GO:0005856~cytoskeleton	8.869452343496601E-6	Q12923, P27695, Q08211, Q8IX90, Q8IVF4, Q15019, P49815, Q9UL03, Q13643, P00519, P09327, Q9UJU6
ABL1	SP_PIR_KEYWORDS	nucleus	1.449873056010149E-5	P27695, Q9UH73, Q9UK59, Q9BX63, P09629, Q9UQB3, Q9H1K1, Q8NG31, Q9H4W6, Q96S55, P00519, Q96T68, P15941, Q14320, Q86UP3, Q8IZD4, P20618, Q08211, Q13627, Q9HAK2, Q9UL03
ABL1	UP_SEQ_FEATURE	zinc finger region:C5-type	2.064695688851357E-5	Q9UH73, Q9H4W6, Q9HAK2
ABL1	INTERPRO	IPR018350:Transcription factor COE, conserved site	2.277535199138017E-5	Q9UH73, Q9H4W6, Q9HAK2
ABL1	INTERPRO	IPR003523:Transcription factor COE	2.277535199138017E-5	Q9UH73, Q9H4W6, Q9HAK2
ABL1	PIR_SUPERFAMILY	PIRSF018314:transcription factor, collier type	3.347215738903905E-5	Q9UH73, Q9H4W6, Q9HAK2
ABL1	SP_PIR_KEYWORDS	phosphoprotein	1.1381201879601089E-4	Q12923, Q9UK59, Q9UQB3, Q8NG31, P49815, Q86UP3, P20618, Q08211, P09619, Q9H792, Q9UJU6, P27695, Q9BX63, Q96CW6, P18669, Q9H1K1, Q96S55, Q15019, P15941, P00519, Q8IZD4, Q13480, Q8IX90, Q9UL03, Q13627, P41091
ABL1	UP_SEQ_FEATURE	domain:IPT/TIG	1.5375400026981518E-4	Q9UH73, Q9H4W6, Q9HAK2
ABL1	SP_PIR_KEYWORDS	nucleotide-binding	1.7354168741975958E-4	Q9BX63, Q08211, P09619, Q9H792, Q8IVF4, Q96S55, Q15019, Q13627, Q14240, P00519, O60488, P41091
ABL1	UP_SEQ_FEATURE	compositionally biased region:Pro/Ser/Thr-rich	2.655607155867603E-4	Q9UH73, Q9H4W6, Q9HAK2
ABL2	GOTERM_CC_FAT	GO:0005829~cytosol	6.90681643948024E-14	P41279, P68104, Q8TCD5, Q9Y490, Q9H1K1, Q9UHI6, P06732, P49815, P08865, P35222, Q06520, P20042, P55196, P20618, P53621, P05412, P23921, Q9NT62, P42684, P62993, P49792, Q96HC4, Q8NFP9, Q06124
ABL2	SP_PIR_KEYWORDS	phosphoprotein	3.633644700910706E-11	Q8NF50, Q14997, Q8NG31, P49815, P16157, P08865, P35222, P20618, P55196, P53621, Q9NT62, P42684, P62993, P49792, P11217, P13647, Q06124, Q01432, Q00610, Q9BRR9, Q07157, P41279, P68104, Q13131, Q8TCD5, Q9Y490, P46020, Q9H1K1, Q9UHI6, P52948, Q02241, P20042,
ABL2	SP_PIR_KEYWORDS	cytoplasm	1.334199725450638E-7	P41279, P68104, P20929, Q8TCD5, Q9Y490, Q9H1K1, Q9UHI6, P29144, P16157, P06732, P49815, P08865, P35222, Q06520, Q02241, P20618, P53621, P23921, Q9NT62, P42684, Q8NFP9, Q06124, O75161, P04792
ABL2	SMART	SM00326:SH3	7.886275838650071E-5	P20929, P62993, P42684, Q8N1I0, Q07157, Q9BRR9
ABL2	SP_PIR_KEYWORDS	cytoskeleton	8.454997607749619E-5	P20929, Q9Y490, P42684, P13647, O75161, P16157, P35222, P04792, Q02241
ABL2	SP_PIR_KEYWORDS	sh3 domain	1.1359352927746588E-4	P20929, P62993, P42684, Q8N1I0, Q07157, Q9BRR9
ABL2	GOTERM_MF_FAT	GO:0005198~structural molecule activity	1.2808226704166218E-4	P20929, P53621, Q9Y490, Q9H1K1, P13647, O75161, P16157, Q00610, P08865, P52948
ABL2	SP_PIR_KEYWORDS	acetylation	1.3601009952406346E-4	P68104, Q9Y490, P29144, P08865, P52948, P20042, P20618, P23921, Q9NT62, P62993, P11217, P09211, P49792, Q96HC4, Q06124, Q00610, P04792
ABL2	INTERPRO	IPR001452:Src homology-3 domain	1.8871351160752758E-4	P20929, P62993, P42684, Q8N1I0, Q07157, Q9BRR9
ABL2	GOTERM_MF_FAT	GO:0019899~enzyme binding	1.9388301079163535E-4	Q8NF50, Q9NT62, Q8N1I0, P49792, Q8NFP9, Q96HC4, Q06124, P16157, P35222
APS	SP_PIR_KEYWORDS	phosphoprotein	3.5290596095484185E-14	Q9NYB9, Q13043, Q8IXJ6, O14492, P17252, P06733, O95954, Q02156, Q9Y4E1, P12814, P42681, Q86WV1, Q02763, P61106, O15381, P32239, O94830, P09104, O43707, Q8NG27, Q86VS8, P04083, P78324, Q9UGN4, P05129, Q7Z3T8, P55265, Q14008, P05771, P35236, O43561, O75369,
APS	SP_PIR_KEYWORDS	cytoplasm	2.022952731644517E-9	Q9NYB9, Q13043, Q8IXJ6, O14492, P17252, P06733, O95954, P12814, Q86WV1, P42681, P13929, O94830, P09104, O43707, Q86VS8, P04083, Q7Z3T8, P55265, P05771, P35236, O75369, Q13813, O43164, Q5VWQ8, O75563, O15117
APS	INTERPRO	IPR015745:Protein kinase C	3.9424012870469906E-9	Q04759, P17252, P05129, P05771, Q02156
APS	UP_SEQ_FEATURE	domain:C2	2.394494219337911E-8	Q5VWQ8, Q04759, P17252, P05129, Q96PV0, P05771, Q02156
APS	GOTERM_MF_FAT	GO:0004697~protein kinase C activity	8.320857026773035E-8	Q04759, P17252, P05129, P05771, Q02156
APS	SP_PIR_KEYWORDS	phospholipid binding	1.5376318220599793E-7	Q04759, P04083, P17252, P05771, Q02156
APS	UP_SEQ_FEATURE	active site:Proton acceptor	1.5609699596728492E-7	Q02763, P42681, Q04759, Q13043, Q8IXJ6, P13929, P17252, P05129, P06733, P09104, P05771, Q02156
APS	UP_SEQ_FEATURE	zinc finger region:Phorbol-ester/DAG-type 2	1.5769774296360644E-7	Q04759, P17252, P05129, P05771, Q02156
APS	UP_SEQ_FEATURE	zinc finger region:Phorbol-ester/DAG-type 1	1.5769774296360644E-7	Q04759, P17252, P05129, P05771, Q02156
APS	SP_PIR_KEYWORDS	phorbol ester binding	3.619504559981438E-7	Q04759, P17252, P05771, Q02156
BCAR3	SP_PIR_KEYWORDS	phosphoprotein	2.521477231250278E-12	O75815, Q8WVD3, Q8TD08, Q9Y6W5, Q5TCQ9, P35228, Q8TEA7, Q9H4M9, Q9UJX2, O60292, Q9H0E2, P08758, Q9HCM2, Q8N5T2, Q92990, Q9NPH3, Q9NUY8, Q9Y5X1, Q8IZP0, Q15111, Q8WV28, Q9UPU7, O75900, O95196, O15211, Q9GZY6, Q6S5L8, Q9P2F8, Q9BZL6, Q8TDM6, O75808, Q9UKK9,
BCAR3	GOTERM_BP_FAT	GO:0051056~regulation of small GTPase mediated signal transduction	8.180957674885162E-9	Q8N5T2, Q0IIM8, O15211, Q9P2F8, Q9NUY8, Q2M2D7, Q8TEA7, Q9UPU7, O60292, Q96DR7
BCAR3	UP_SEQ_FEATURE	domain:Rab-GAP TBC	1.3995597576572532E-8	Q8N5T2, Q0IIM8, Q9NUY8, Q2M2D7, Q8TEA7, Q9UPU7
BCAR3	GOTERM_MF_FAT	GO:0030695~GTPase regulator activity	3.716320537441851E-8	O75815, Q8N5T2, Q0IIM8, O15211, Q9P2F8, Q9NUY8, Q2M2D7, Q8TEA7, Q9UPU7, O60292, Q96DR7
BCAR3	GOTERM_MF_FAT	GO:0060589~nucleoside-triphosphatase regulator activity	4.575322318648621E-8	O75815, Q8N5T2, Q0IIM8, O15211, Q9P2F8, Q9NUY8, Q2M2D7, Q8TEA7, Q9UPU7, O60292, Q96DR7
BCAR3	GOTERM_BP_FAT	GO:0032313~regulation of Rab GTPase activity	1.0494286089083666E-7	Q8N5T2, Q0IIM8, Q9NUY8, Q2M2D7, Q8TEA7, Q9UPU7
BCAR3	GOTERM_BP_FAT	GO:0032483~regulation of Rab protein signal transduction	1.0494286089083666E-7	Q8N5T2, Q0IIM8, Q9NUY8, Q2M2D7, Q8TEA7, Q9UPU7
BCAR3	GOTERM_MF_FAT	GO:0005097~Rab GTPase activator activity	1.2245296739966856E-7	Q8N5T2, Q0IIM8, Q9NUY8, Q2M2D7, Q8TEA7, Q9UPU7
BCAR3	GOTERM_MF_FAT	GO:0005096~GTPase activator activity	1.071000596723328E-6	Q8N5T2, Q0IIM8, Q9P2F8, Q9NUY8, Q2M2D7, Q8TEA7, Q9UPU7, O60292
BCAR3	INTERPRO	IPR000195:RabGAP/TBC	1.3126517230272434E-6	Q8N5T2, Q0IIM8, Q9NUY8, Q8TEA7, Q9UPU7
BLK	GOTERM_CC_FAT	GO:0005886~plasma membrane	1.726805563975484E-14	Q9UGI8, O14763, Q01082, P29317, P61026, Q8WUD1, P21462, P18433, P08865, Q5SZK8, P61106, Q9UKW4, P56945, Q8NGX2, P55283, P55011, Q460N5, P50281, P00813, Q9Y6R1, Q9UQ49, Q6IF00, Q92736, P19438, P30926, O43451, P15498, Q9Y666, Q7KZI7, Q6IFG1, Q96K78, Q96R27,
BLK	SP_PIR_KEYWORDS	cell membrane	3.5672315362033114E-9	Q01082, Q9Y6R1, P61026, Q8WUD1, Q6IF00, P21462, P08865, Q5SZK8, P19438, Q8NGX2, P61106, P30926, O43451, O75106, P55283, Q7KZI7, Q6IFG1, Q96K78, Q96R27, Q9Y487, P00813, Q9GZK7
BLK	SP_PIR_KEYWORDS	membrane	1.2789039237882702E-7	O14763, Q01082, P29317, O75096, P61026, Q8WUD1, P21462, P18433, P08865, Q5SZK8, P61106, Q8NGX2, O75106, P55283, P55011, P50281, P00813, Q9Y6R1, Q9UQ49, Q6IF00, Q92736, P19438, P30926, O43451, Q9Y666, Q7KZI7, Q6IFG1, Q96K78, Q96R27, Q9NYJ8, Q9Y487, Q9UHW9,
BLK	UP_SEQ_FEATURE	topological domain:Cytoplasmic	1.555406065228452E-6	O14763, P29317, O75096, Q9Y6R1, Q6IF00, P21462, P18433, Q92736, Q5SZK8, P19438, Q8NGX2, P30926, O43451, Q9Y666, P55283, P55011, Q6IFG1, Q96K78, Q96R27, P50281, Q9Y487, Q9UHW9, Q9GZK7
BLK	SP_PIR_KEYWORDS	receptor	8.992029989267935E-6	P29317, O14763, O75096, P21462, Q6IF00, P18433, P08865, Q92736, P19438, Q8NGX2, P62993, Q6IFG1, Q96K78, Q96R27, Q9GZK7
BLK	SP_PIR_KEYWORDS	sh3 domain	9.003682651119049E-6	P42681, Q9UKW4, P56945, P51451, P62993, P15498, Q9H6S3
BLK	GOTERM_CC_FAT	GO:0044459~plasma membrane part	1.690348106349684E-5	Q9UGI8, Q01082, P29317, Q9Y6R1, P61026, Q9UQ49, Q8WUD1, P18433, Q5SZK8, P19438, P61106, P56945, P30926, Q9Y666, P55283, P55011, P50281, Q9UHW9, P00813
BLK	INTERPRO	IPR001452:Src homology-3 domain	1.916374447569601E-5	P42681, Q9UKW4, P56945, P51451, P62993, P15498, Q9H6S3
BLK	GOTERM_BP_FAT	GO:0007242~intracellular signaling cascade	1.9549559580011412E-5	P51451, O14763, Q15208, Q8N4C8, P61026, Q8WUD1, P21462, P42681, Q9UKW4, P61106, P11274, P62993, P15498, O14641, Q7KZI7
BLK	SMART	SM00326:SH3	4.699838181958766E-5	P42681, Q9UKW4, P56945, P51451, P62993, P15498, Q9H6S3
BMX	GOTERM_CC_FAT	GO:0005829~cytosol	1.1473723755167685E-14	Q71U36, Q8WZ42, P17252, P08865, O60678, Q15056, P41743, Q16644, P68366, P53396, Q14980, P41279, Q99996, P51813, P19174, Q96P26, Q13813, P20042, Q08881, P23921, P07814, O76090, O75874, Q14204, Q8NFP9
BMX	SP_PIR_KEYWORDS	phosphoprotein	2.4564506673753535E-13	P42224, Q71U36, Q8WZ42, Q14997, P17252, Q9UDY2, P53778, P08865, Q92844, Q12792, O60678, Q15056, P41743, P11274, Q16644, P68366, P53396, P17661, Q9UPY3, Q14980, O15264, P41279, P98077, Q99996, P51812, P51813, P19174, P49454, P52948, Q93009, Q13813, P20042,
BMX	SP_PIR_KEYWORDS	cytoplasm	5.863530492414063E-10	P42224, Q8WZ42, P17252, P53778, P08865, Q92844, Q12792, O60678, Q15056, P41743, Q16644, O75161, P53396, P17661, Q9UPY3, P41279, Q99996, P51813, Q96P26, P49454, Q13813, P23921, O75874, Q14204, Q8NFP9, O75563, O15117
BMX	GOTERM_BP_FAT	GO:0006468~protein amino acid phosphorylation	9.078664339475306E-9	P41279, Q99996, P42224, P51812, P51813, Q8WZ42, P17252, P53778, Q12792, Q08881, P41743, P11274, Q16644, O15117, O15264
BMX	SP_PIR_KEYWORDS	nucleotide-binding	9.553300991462374E-9	P41279, Q99996, Q71U36, P51812, P51813, Q8WZ42, P17252, P53778, Q08881, P41743, P23921, P11274, P07814, Q16644, P68366, Q14204, P53396, Q9UPY3, O15264
BMX	SP_PIR_KEYWORDS	atp-binding	1.5644427957904764E-8	P41279, Q99996, P51812, P51813, Q8WZ42, P17252, P53778, Q08881, P41743, P23921, P11274, P07814, Q16644, Q14204, P53396, Q9UPY3, O15264
BMX	GOTERM_BP_FAT	GO:0016310~phosphorylation	8.964840530018933E-8	P41279, Q99996, P42224, P51812, P51813, Q8WZ42, P17252, P53778, Q12792, Q08881, P41743, P11274, Q16644, O15117, O15264
BMX	INTERPRO	IPR017441:Protein kinase, ATP binding site	1.4069928751268553E-7	Q08881, P41279, Q99996, P41743, Q16644, P51812, Q8WZ42, P51813, P17252, P53778, O15264
BMX	UP_SEQ_FEATURE	nucleotide phosphate-binding region:ATP	1.4854658328189175E-7	P41279, P51812, P51813, Q8WZ42, P17252, P53778, Q08881, P41743, P07814, Q16644, Q14204, P53396, Q9UPY3, O15264
BMX	SP_PIR_KEYWORDS	serine/threonine-protein kinase	1.6412274405940932E-7	P41279, Q99996, P41743, P11274, Q16644, P51812, Q8WZ42, P17252, P53778, O15264
BRDG1	INTERPRO	IPR004099:Pyridine nucleotide-disulphide oxidoreductase, dimerisation	9.538450841492512E-7	O95831, Q9NNW7, Q16881
BRDG1	INTERPRO	IPR001327:Pyridine nucleotide-disulphide oxidoreductase, NAD-binding region	1.4281271659276867E-6	O95831, Q9NNW7, Q16881
BRDG1	SP_PIR_KEYWORDS	phosphoprotein	1.2929580810154899E-5	P19784, O14745, Q9ULZ2, Q9Y2D8, Q96EA4, P17252, Q9Y6Y8, O95831, Q99459, O15530, Q92625, P11216, P04844, Q13263, Q96AC1, P46459, Q13191, Q9Y5X1, Q9BUQ8, Q8TAQ5, P13010, Q9UDV7, P21333, Q86T24, Q96Q89, Q9NQ84, P03372, O95361, Q15746, Q16881, P25445, O15164,
BRDG1	INTERPRO	IPR013027:FAD-dependent pyridine nucleotide-disulphide oxidoreductase	1.6173070528554414E-5	O95831, Q9NNW7, Q16881
BRDG1	SP_PIR_KEYWORDS	cytoplasm	1.746010618744149E-5	Q9ULZ2, P46459, P17252, Q96EA4, Q13191, Q309B1, P21333, Q93088, Q9HC16, Q99707, Q86T24, Q96Q89, Q99459, O95361, O15530, O75874, Q92625, Q9H1Y0, Q16881, Q7Z3Y8, Q96AC1
BRDG1	UP_SEQ_FEATURE	domain:Hcy-binding	1.849813303722808E-5	Q9H2M3, Q93088, Q99707
BRDG1	INTERPRO	IPR003726:Homocysteine S-methyltransferase	2.0419257617926244E-5	Q9H2M3, Q93088, Q99707
BRDG1	GOTERM_MF_FAT	GO:0008898~homocysteine S-methyltransferase activity	3.058754757936712E-5	Q9H2M3, Q93088, Q99707
BRDG1	SP_PIR_KEYWORDS	acetylation	3.2703440341245185E-5	P19784, O14745, P17252, Q9NNW7, P12429, Q9Y5X1, P13010, P21333, O95831, Q99459, O15091, O15530, O75874, Q92625, Q16881, P11216, Q13263, P35914
BRDG1	SP_PIR_KEYWORDS	metal-binding	4.540396026103749E-5	Q9H2M3, Q9BYV7, P46459, P17252, Q13191, Q8TAQ5, Q2M3W8, Q9UDV7, Q93088, Q9HC16, Q99707, Q86T24, P03372, O95361, Q15746, O75874, O15164, Q13263, P35914
BTK	SP_PIR_KEYWORDS	phosphoprotein	3.746822666903292E-8	P42224, Q8IXJ6, P07333, P32927, Q14997, Q8NG31, P31948, P18433, P08865, Q06187, Q9Y4I1, Q16644, O15530, Q9H792, P55011, Q7L591, Q8WU20, P41279, O75665, O94929, Q96ST3, P15941, P52948, Q93008, P38646, Q8IZD4, Q9NT99, Q8N1I0, Q9H788, O76090, Q8NFP9, Q9UJV9,
BTK	SP_PIR_KEYWORDS	cytoplasm	7.61611890875492E-8	P41279, O75665, O94929, Q9GZN1, P42224, Q8IXJ6, Q96IV0, Q9H467, P31948, P08865, P15941, O00507, Q06187, Q93008, Q8IZD4, Q16644, Q9H788, O15530, O75874, Q8NFP9, O75161, Q7L591, Q9BVQ7, Q8N7A1
BTK	GOTERM_BP_FAT	GO:0006468~protein amino acid phosphorylation	2.964808958176067E-4	P41279, P42224, O15530, P07333, Q16644, Q9H792, Q8WU20, P18433, Q06187
BTK	SP_PIR_KEYWORDS	acetylation	3.697340731763941E-4	Q9GZN1, Q8IXJ6, Q8TDN6, Q96ST3, Q96IV0, P31948, P08865, P52948, Q06187, P38646, Q8IZD4, Q16644, Q9H788, O15530, O75874, Q7L591
BTK	GOTERM_BP_FAT	GO:0016310~phosphorylation	9.935905344646508E-4	P41279, P42224, O15530, P07333, Q16644, Q9H792, Q8WU20, P18433, Q06187
BTK	SP_PIR_KEYWORDS	SH2 domain	0.00195126	P42224, Q9H788, O00459, Q06187
BTK	GOTERM_MF_FAT	GO:0005158~insulin receptor binding	0.00200658	O15530, Q8WU20, Q7L591
BTK	SP_PIR_KEYWORDS	atp-binding	0.00227909	P41279, Q9Y4I1, O15530, P07333, Q16644, Q9H792, Q9UJV9, Q9BVQ7, Q06187, P38646
BTK	INTERPRO	IPR000980:SH2 motif	0.0025527	P42224, Q9H788, O00459, Q06187
BTK	UP_SEQ_FEATURE	active site:Proton acceptor	0.00335216	P41279, O15530, P07333, Q8IXJ6, Q16644, Q9H792, Q06187
CRKL	GOTERM_CC_FAT	GO:0005829~cytosol	4.0872569731912415E-13	Q99996, P25788, Q13257, O14920, Q04637, P14923, P00519, P24941, Q96M96, P35222, Q03135, P53621, O43933, P42684, P49792, Q8NFP9, P48147, P57721, Q5JSP0, P42345, P55072, Q13557, P41091
CRKL	SP_PIR_KEYWORDS	phosphoprotein	4.311410869057101E-11	Q13257, P25788, Q14997, O14920, Q8WWN8, P35222, Q03135, O43264, Q16555, Q5JTC6, P53621, P46109, P42684, P49792, O60716, Q9UQM7, P42345, Q14194, Q14195, P55072, Q99996, Q04637, P14923, P00519, P24941, Q96M96, O95487, Q9BZD4, O43933, Q8NFP9, Q5JSP0, Q13555,
CRKL	SP_PIR_KEYWORDS	cytoplasm	6.206784328722766E-11	P25788, Q13257, O14920, P35222, Q8WWN8, O43264, Q16555, P62195, Q5JTC6, P53621, P42684, O60716, P48147, P57721, Q14194, P55072, Q14195, Q99996, P14923, P00519, Q96M96, O95487, O43933, Q9NUP1, Q8NFP9, Q5JSP0, P62333
CRKL	GOTERM_BP_FAT	GO:0000278~mitotic cell cycle	2.496240273692787E-9	Q9BZD4, Q13257, P25788, Q9UQM7, Q13555, P62333, P00519, P24941, Q13554, Q13557, O43264, P62195
CRKL	GOTERM_BP_FAT	GO:0022402~cell cycle process	1.784306369863596E-8	P25788, Q13257, P24941, P00519, P35222, P62195, O43264, Q9BZD4, Q9UQM7, Q13555, P62333, Q13554, Q13557
CRKL	INTERPRO	IPR013543:Calcium/calmodulin dependent protein kinase II, association-domain	5.1212437576102484E-8	Q9UQM7, Q13555, Q13554, Q13557
CRKL	INTERPRO	IPR015742:Calcium/calmodulin-dependent protein kinase II isoform	5.1212437576102484E-8	Q9UQM7, Q13555, Q13554, Q13557
CRKL	KEGG_PATHWAY	hsa04012:ErbB signaling pathway	6.605070248777462E-8	P46109, P42684, Q9UQM7, Q13555, P00519, P42345, Q13554, Q13557
CRKL	PIR_SUPERFAMILY	PIRSF000594:calcium/calmodulin-dependent protein kinase II	1.3619281335674438E-7	Q9UQM7, Q13555, Q13554, Q13557
CRKL	GOTERM_BP_FAT	GO:0007049~cell cycle	5.707665288413522E-7	P25788, Q13257, P24941, P00519, P35222, P62195, O43264, Q9BZD4, Q9UQM7, Q13555, P62333, Q13554, Q13557
CRK	SP_PIR_KEYWORDS	cytoplasm	4.19548565720773E-7	Q9UHB6, Q8N0Z2, Q99996, P25788, P06239, Q15283, Q96GX9, Q5KSL6, Q9BUH8, P53621, Q9NUP1, O60716, P57721, P08631, Q96HR8, Q9NP31, Q14194, P46108, Q14195, Q969F2
CRK	SP_PIR_KEYWORDS	phosphoprotein	8.487866616659594E-7	Q9UHB6, P25788, P06239, Q12774, Q5KSL6, P53621, Q9BUH8, O14981, Q9H792, O60716, P08631, Q8NI35, Q9NP31, Q14194, P46108, Q14195, P04844, Q07866, Q99996, Q9NQT6, Q9NSK0, Q9BZD4, Q8WXI7, Q99638, Q6P597, Q9Y6J0, Q96HR8, P41091
CRK	INTERPRO	IPR002151:Kinesin light chain	3.3396289277974916E-5	Q6P597, Q9NSK0, Q07866
CRK	INTERPRO	IPR015390:Rabaptin, GTPase-Rab5 binding	5.003630814788668E-5	Q6P597, Q9NSK0, Q07866
CRK	GOTERM_CC_FAT	GO:0005856~cytoskeleton	8.444719213795478E-5	Q9UHB6, P25788, Q99996, Q8N0Z2, Q9NQT6, P06239, Q6P597, O14926, Q9NSK0, Q14194, Q14195, Q07866
CRK	UP_SEQ_FEATURE	repeat:TPR 5	3.308570548327897E-4	Q6P597, Q9Y6J0, Q9NSK0, Q07866
CRK	UP_SEQ_FEATURE	domain:SH2	6.56323731111886E-4	P06239, P08631, Q9NP31, P46108
CRK	UP_SEQ_FEATURE	repeat:TPR 4	6.764493806960748E-4	Q6P597, Q9Y6J0, Q9NSK0, Q07866
CRK	GOTERM_CC_FAT	GO:0005871~kinesin complex	6.92829921067329E-4	Q6P597, Q9NSK0, Q07866
CRK	INTERPRO	IPR001440:Tetratricopeptide TPR-1	8.349699950777473E-4	Q6P597, Q9Y6J0, Q9NSK0, Q07866
CTEN	SP_PIR_KEYWORDS	cytoplasm	2.623001386087111E-15	Q9H361, Q7L9L4, Q9NR46, Q9P225, P27797, P30520, Q9HC35, O96028, Q12792, P35222, Q99832, Q5KSL6, P42681, Q7KZF4, Q9NQ94, Q15058, P29474, P48147, Q92625, Q9BW04, Q9UHB9, Q9UQC2, Q13310, Q13107, P05787, Q9Y371, Q9UKI2, P11940, Q8IX90, Q14204, Q9NSD9, Q8IZW8,
CTEN	SP_PIR_KEYWORDS	acetylation	2.4659482564664435E-9	Q9H361, P53582, Q7L9L4, Q13596, Q13310, P27797, P05787, P30520, Q12792, O96028, Q99549, Q99832, P12270, Q92734, P11940, Q7KZF4, Q92499, Q14204, Q08945, P48147, Q9NSD9, Q92625, Q9UHB9, P62851
CTEN	SP_PIR_KEYWORDS	phosphoprotein	5.0492856774299685E-8	Q9H361, Q13596, Q7L9L4, Q9P225, P16234, Q9HC35, O96028, Q12792, P35222, Q5KSL6, P12270, P42681, Q7KZF4, Q15058, P29474, Q92625, Q9UHB9, P54840, P53582, Q9UQC2, Q13310, Q13107, P05787, P09884, Q99549, Q92734, Q9UKI2, P11940, Q92499, Q15746, Q8IX90, Q14204,
CTEN	GOTERM_CC_FAT	GO:0043232~intracellular non-membrane-bounded organelle	1.7996486678331375E-6	P54840, Q9NR46, Q9P225, P05787, P09884, Q9HC35, Q12792, P35222, Q99549, P12270, Q9UKI2, Q9NQ94, Q15058, Q8IX90, Q14204, Q99638, Q08945, P29474, Q8IZW8, Q9UHB9, P62851
CTEN	GOTERM_CC_FAT	GO:0043228~non-membrane-bounded organelle	1.7996486678331375E-6	P54840, Q9NR46, Q9P225, P05787, P09884, Q9HC35, Q12792, P35222, Q99549, P12270, Q9UKI2, Q9NQ94, Q15058, Q8IX90, Q14204, Q99638, Q08945, P29474, Q8IZW8, Q9UHB9, P62851
CTEN	GOTERM_MF_FAT	GO:0000166~nucleotide binding	2.7614858177709542E-5	Q9H361, Q13310, Q9P225, P16234, P30520, P09884, Q99832, Q5KSL6, P42681, Q92734, P12270, P11940, Q92499, Q9NQ94, Q15058, Q15746, Q14204, P29474, Q9NSD9
CTEN	INTERPRO	IPR006515:Polyadenylate binding protein, human types 1, 2, 3, 4	3.711257230075302E-5	Q9H361, P11940, Q13310
CTEN	GOTERM_MF_FAT	GO:0003729~mRNA binding	4.382441779384144E-5	Q9H361, P11940, Q9NQ94, Q13310, P27797
CTEN	UP_SEQ_FEATURE	domain:PABC	5.396034041447545E-5	Q9H361, P11940, Q13310
CTEN	INTERPRO	IPR002004:Polyadenylate-binding protein/Hyperplastic disc protein	6.175529366923382E-5	Q9H361, P11940, Q13310
E109111	SP_PIR_KEYWORDS	nucleus	3.0172720535657665E-13	Q9NPI6, Q96K58, P14866, Q9UPP1, P17931, Q9Y230, P06493, Q92800, O95831, P10275, Q8NF91, Q460N5, P37231, Q6P9A3, Q99959, Q86UW9, O60437, P18583, Q96ST3, Q6EMB2, Q13155, Q9BUQ8, Q9NQ33, O60281, P25205, Q7KZ85, Q9UQR0, Q13627, Q13609, Q14764, Q9UER7, Q53GS9,
E109111	SP_PIR_KEYWORDS	phosphoprotein	5.5700104246239546E-12	Q9NPI6, O94875, O15169, P14866, Q9UPP1, Q9Y230, P17931, P06493, O95831, P10275, Q8NF91, P09619, Q92625, Q86TU7, P37231, Q9Y3A5, Q99959, Q86UW9, O60437, P18583, Q9Y616, Q96ST3, Q6EMB2, Q13155, Q9BUQ8, Q14517, P19367, O60281, P35579, P25205, Q7KZ85, Q9UQR0,
E109111	SP_PIR_KEYWORDS	acetylation	1.1327724565997086E-5	P18583, Q96ST3, P14866, P17931, Q9Y230, P06493, P19367, O60281, P35579, P25205, O95831, Q7KZ85, Q92625, Q14764, Q9Y3A5, Q9UER7, Q53GS9, P04792, Q86UW9
E109111	SP_PIR_KEYWORDS	atp-binding	9.261129442987933E-5	Q9Y616, Q9BUQ8, Q9Y230, P06493, P19367, Q08828, P35579, P25205, P09619, P33527, Q07912, Q13627, O14647
E109111	SP_PIR_KEYWORDS	Transcription	1.290719656424296E-4	Q96ST3, Q6EMB2, Q96K58, Q9UPP1, Q9Y230, Q9NQ33, O60281, P25205, Q92800, P10275, Q7KZ85, Q9UQR0, Q460N5, Q9UER7, P37231, Q6P9A3
E109111	GOTERM_MF_FAT	GO:0030554~adenyl nucleotide binding	2.781393605062225E-4	Q9Y616, Q9BUQ8, Q9Y230, P06493, P19367, P35579, Q08828, P25205, O95831, P09619, P33527, Q07912, Q13627, O14647
E109111	GOTERM_MF_FAT	GO:0001883~purine nucleoside binding	3.2603202714490294E-4	Q9Y616, Q9BUQ8, Q9Y230, P06493, P19367, P35579, Q08828, P25205, O95831, P09619, P33527, Q07912, Q13627, O14647
E109111	SP_PIR_KEYWORDS	ATP	3.272881264841066E-4	P09619, P33527, Q13627, Q07912, P06493, P19367
E109111	GOTERM_MF_FAT	GO:0001882~nucleoside binding	3.502756691517889E-4	Q9Y616, Q9BUQ8, Q9Y230, P06493, P19367, P35579, Q08828, P25205, O95831, P09619, P33527, Q07912, Q13627, O14647
E109111	SP_PIR_KEYWORDS	transcription regulation	3.7942231384375255E-4	Q96ST3, Q96K58, Q9UPP1, Q9Y230, Q9NQ33, O60281, P25205, Q92800, P10275, Q7KZ85, Q9UQR0, Q460N5, Q9UER7, P37231, Q6P9A3
E185634	GOTERM_CC_FAT	GO:0005886~plasma membrane	2.497472746533007E-18	P53794, Q01814, O14745, P04114, P51153, P16234, Q8WUD1, P35221, P61106, Q8NGX2, O00750, Q5JQS5, P25098, P15260, P02679, P46020, Q8NH00, Q99541, Q9Y6N7, Q8IYK8, P52735, P50570, Q6IF00, O00591, P20020, P34982, Q14517, P12259, Q07889, Q8NGM9, Q92556, O43752,
E185634	SP_PIR_KEYWORDS	cell membrane	7.586227271083355E-13	Q01814, P51153, Q8WUD1, P35221, Q8NGX2, P61106, O00750, Q5JQS5, P46020, Q8NH00, P50570, Q8IYK8, Q6IF00, O00591, P20020, P34982, Q14517, Q8NGM9, Q92556, P07550, Q6S5L8, O75116, Q14542, Q96R27, P13796, P51686
E185634	SP_PIR_KEYWORDS	membrane	7.576252773718359E-11	P53794, Q01814, O14745, P51153, P16234, Q8WUD1, P35221, P61106, Q8NGX2, O00750, Q5JQS5, P15260, P46020, Q8NH00, Q99541, Q9Y6N7, Q8IYK8, P50570, Q6IF00, O00591, P20020, P34982, Q14517, Q8NGM9, Q92556, O43752, P07550, Q6S5L8, O75116, Q14542, P06127, Q14184,
E185634	GOTERM_CC_FAT	GO:0044459~plasma membrane part	1.1435987318993887E-8	P53794, O14745, Q01814, P51153, Q8WUD1, P16234, P35221, P61106, P25098, P02679, P15260, P46020, Q9Y6N7, P50570, P20020, O00591, P34982, Q14517, P07550, Q6S5L8, Q14542, P06127, Q30201, P13796, P51686
E185634	UP_SEQ_FEATURE	topological domain:Extracellular	4.484200798690141E-6	P53794, P15260, Q01814, Q8NH00, Q9Y6N7, P16234, Q6IF00, O00591, P20020, P34982, Q14517, Q8NGM9, P07550, Q8NGX2, Q5JQS5, Q96R27, Q30201, P06127, Q9H6D8, P51686
E185634	UP_SEQ_FEATURE	topological domain:Cytoplasmic	2.7654446388362007E-5	P53794, P15260, Q01814, Q8NH00, Q9Y6N7, P16234, Q6IF00, O00591, P20020, P34982, Q14517, Q8NGM9, O43752, P07550, Q8NGX2, Q5JQS5, Q96R27, Q30201, P06127, Q9H6D8, P51686
E185634	UP_SEQ_FEATURE	disulfide bond	3.22848608415157E-5	P02679, P15260, P04114, Q8NH00, Q9Y6N7, P16234, Q6IF00, O00591, P34982, Q14517, P12259, Q8NGM9, P07550, Q8NGX2, Q5JQS5, Q96R27, Q30201, P06127, P51686
E185634	SP_PIR_KEYWORDS	disulfide bond	4.8785633848441095E-5	P02679, P15260, P04114, Q8NH00, Q9Y6N7, P16234, Q6IF00, O00591, P34982, Q14517, P12259, Q8NGM9, P07550, Q8NGX2, Q5JQS5, Q96R27, Q30201, P06127, P51686
E185634	UP_SEQ_FEATURE	glycosylation site:N-linked (GlcNAc...)	1.6065688764368936E-4	P53794, P02679, P15260, P04114, Q8NH00, Q9Y6N7, P16234, Q6IF00, O00591, P34982, P12259, Q14517, Q8NGM9, P07550, Q8NGX2, Q5JQS5, Q14542, Q96R27, Q30201, P06127, Q9H6D8, P51686
E185634	SP_PIR_KEYWORDS	receptor	2.0507433111976295E-4	P15260, Q8NH00, Q9Y6N7, P16234, Q6IF00, P34982, Q8NGM9, P07550, Q8NGX2, Q5JQS5, Q96R27, P25098, P51686
EAT2	SP_PIR_KEYWORDS	phosphoprotein	1.8497596079365978E-7	Q58EX7, Q8TD08, Q9Y4G8, Q9Y230, Q5TCQ9, Q9H4M9, Q63HR2, Q01484, Q9UJX2, P61106, Q6IA17, P42685, Q9P2K8, P08758, O75381, P61224, Q13131, Q86UK7, O60347, Q9H2M9, Q9BXI6, Q9Y5X1, Q8IZP0, Q96RL7, O95196, P14317, Q9P2F8, P32248, Q9UKK9, O60486
EAT2	GOTERM_BP_FAT	GO:0046907~intracellular transport	1.9189286553456367E-5	O95196, P61106, P24390, Q9H2M9, Q9Y5X1, Q9H2X3, Q9NNX6, O75381, Q96RL7, Q9H4M9
EAT2	GOTERM_CC_FAT	GO:0005886~plasma membrane	1.6453388303110642E-4	Q9Y5X1, Q8IZP0, Q9BXR5, Q9Y4G8, Q5TCQ9, Q9NNX6, Q63HR2, Q9H4M9, Q01484, P40145, Q9Y4D7, O95196, P61106, Q9H2X3, P32248, O75381, O60486, P61224
EAT2	GOTERM_BP_FAT	GO:0007242~intracellular signaling cascade	5.799663711963236E-4	P40145, Q13131, P61106, P14317, Q9BXR5, Q9H2X3, Q9Y4G8, Q5TCQ9, Q9NNX6, Q63HR2, P61224
EAT2	GOTERM_MF_FAT	GO:0005096~GTPase activator activity	0.00136629	O60347, Q9P2F8, Q9H2M9, Q9BXI6, Q9Y4G8
EAT2	SP_PIR_KEYWORDS	cell membrane	0.00164964	Q9Y4D7, O95196, P61106, P32248, Q9H2X3, Q9Y4G8, Q5TCQ9, Q9NNX6, Q63HR2, Q9H4M9, Q01484, P61224
EAT2	GOTERM_MF_FAT	GO:0030695~GTPase regulator activity	0.00182375	Q58EX7, O60347, Q9P2F8, Q9H2M9, Q9BXI6, Q9Y4G8
EAT2	GOTERM_MF_FAT	GO:0060589~nucleoside-triphosphatase regulator activity	0.00200897	Q58EX7, O60347, Q9P2F8, Q9H2M9, Q9BXI6, Q9Y4G8
EAT2	GOTERM_BP_FAT	GO:0051056~regulation of small GTPase mediated signal transduction	0.00314625	Q58EX7, O60347, Q9P2F8, Q9BXI6, Q9Y4G8
EAT2	SP_PIR_KEYWORDS	nucleotide-binding	0.00318706	P40145, Q13131, P61106, P42685, Q9P2K8, Q8TD08, Q9Y230, Q5TCQ9, Q9H4M9, P61224
FER	SP_PIR_KEYWORDS	phosphoprotein	1.4811516490736386E-10	P56715, O95248, Q9UPN6, P42224, Q8WUF5, Q92794, Q8N9B5, P68400, Q9UPR0, P35222, Q02763, P07900, P11274, P58107, P40259, Q13618, Q9NZ32, P13807, Q07157, Q16543, P53582, Q9BWW4, Q03001, Q9Y5X1, P13010, P16591, Q5JSL3, Q14511, Q9BWG4, Q15746, P08238, Q08945,
FER	SP_PIR_KEYWORDS	ubl conjugation	7.2687978138818115E-6	Q16543, O75444, P42224, Q08945, Q03001, P13010, Q13618, P60900, Q8N9B5, P35222
FER	UP_SEQ_FEATURE	domain:SH3	5.8255575321274416E-5	Q8WUF5, Q9NR46, Q03001, Q9Y5X1, Q14511, Q07157
FER	GOTERM_CC_FAT	GO:0005694~chromosome	5.85566431291097E-5	O75444, Q92794, Q8TDI0, Q08945, P13010, P68400, Q96MW7, O14647
FER	SP_PIR_KEYWORDS	sh3 domain	1.2666726010293183E-4	Q8WUF5, Q9NR46, Q03001, Q9Y5X1, Q14511, Q07157
FER	GOTERM_CC_FAT	GO:0043228~non-membrane-bounded organelle	1.668107191416383E-4	O75444, Q9NR46, P42224, Q92794, Q03001, P13010, Q14511, P68400, P35222, P58107, Q08945, Q8TDI0, Q13224, Q9NZ32, Q96MW7, O14647
FER	GOTERM_CC_FAT	GO:0043232~intracellular non-membrane-bounded organelle	1.668107191416383E-4	O75444, Q9NR46, P42224, Q92794, Q03001, P13010, Q14511, P68400, P35222, P58107, Q08945, Q8TDI0, Q13224, Q9NZ32, Q96MW7, O14647
FER	GOTERM_CC_FAT	GO:0044427~chromosomal part	1.921610127567785E-4	O75444, Q92794, Q8TDI0, P13010, P68400, Q96MW7, O14647
FER	SP_PIR_KEYWORDS	nucleus	7.688131539846055E-4	O75444, O95248, Q8WUF5, P42224, Q92794, Q9BWW4, P40337, P13010, P16591, Q9GZU8, Q14511, Q8N9B5, P35222, Q9BWG4, Q08945, Q8TDI0, Q13618, Q8N699, P60900, Q96MW7, O14647
FER	SP_PIR_KEYWORDS	cytoplasm	8.773818158159751E-4	Q16543, Q8WUF5, Q9NR46, P42224, Q03001, P40337, P16591, Q14511, Q8N9B5, Q9UPR0, P35222, P07900, P58107, P08238, P57737, Q9NXJ5, P60900, Q9NZ32
FES	SP_PIR_KEYWORDS	cytoplasm	4.913318105162058E-10	P42224, Q13574, Q9H467, Q5VT06, Q9UPR0, P35222, Q9GZZ9, O75083, P08631, P49888, Q9UPY3, Q8TDY2, Q8N7A1, P25325, P68104, P04083, Q13347, P55795, Q8NFP9, O75116, Q13884, Q9NXJ5, P62333, P60900, P13796, Q8NHQ1
FES	SP_PIR_KEYWORDS	phosphoprotein	3.6979919645172743E-9	P07332, P42224, P30613, Q13574, P16234, Q5VT06, P31943, P68400, Q9UPR0, P35222, Q9Y4I1, Q9GZZ9, P11274, O75083, P08631, Q13618, Q9UPY3, Q8TDY2, P68104, P04083, O75164, P52735, Q9Y5X1, P13010, Q13347, P55795, O76090, Q8NFP9, O75116, Q13884, P62333, P60900,
FES	SP_PIR_KEYWORDS	atp-binding	2.131921686929417E-6	P07332, P30613, Q13574, P16234, P13010, P68400, Q9Y4I1, Q9GZZ9, P11274, O75116, P08631, P62333, P00533, Q9UPY3
FES	GOTERM_CC_FAT	GO:0005829~cytosol	3.046194272344102E-6	P68104, P07332, P52735, P35222, Q13347, P55795, O76090, Q8NFP9, O75083, O75116, P49888, Q9NXJ5, P13796, P35658, Q8NHQ1
FES	SP_PIR_KEYWORDS	nucleotide-binding	5.451834099351819E-6	P68104, P07332, P30613, Q13574, P16234, P13010, P68400, Q9Y4I1, Q9GZZ9, P11274, O75116, P08631, P62333, Q9UPY3, P00533
FES	SP_PIR_KEYWORDS	kinase	1.1407415025612221E-5	P11274, P07332, P30613, Q13574, O75116, P16234, P08631, P00533, P68400, Q8TDY2
FES	SP_PIR_KEYWORDS	phosphotransferase	6.543462508155024E-5	P11274, P07332, P30613, P16234, P00533, P68400
FES	SP_PIR_KEYWORDS	acetylation	2.0241342218767073E-4	P68104, P04083, P30613, Q9Y5X1, P13010, Q9UPR0, P68400, P31943, Q13347, P55795, O75083, Q13884, P62333, P60900, P13796, P35658
FES	GOTERM_MF_FAT	GO:0005524~ATP binding	2.2388679388961615E-4	P07332, P30613, Q13574, P16234, P13010, P68400, Q9Y4I1, P11274, O75116, P08631, P62333, P00533, Q9UPY3
FES	GOTERM_MF_FAT	GO:0000166~nucleotide binding	2.397744219142361E-4	P68104, P07332, P30613, Q13574, P16234, P13010, P68400, P31943, Q9Y4I1, P55795, P11274, O75116, P08631, P62333, Q9UPY3, P00533
FGR	SP_PIR_KEYWORDS	phosphoprotein	4.3711217931235074E-10	P31785, Q9NPI6, P07437, P17658, Q71U36, Q15208, P17252, P29692, P35222, P68371, Q9H4M9, P68366, Q9UBT7, P31751, P09104, O43312, P09769, P22694, P12277, Q9Y6D9, Q9Y490, P78324, P17987, Q8N4C8, P06744, P14923, Q99704, Q9Y4H2, Q12955, O15371, Q9H3M7, P00533,
FGR	GOTERM_CC_FAT	GO:0005829~cytosol	1.682421059023366E-9	P07437, P62633, O43242, P12277, Q71U36, Q9Y6D9, Q9Y490, P17987, P17252, P29692, P14923, P35222, P68371, P68366, P60891, O15371, P31751, P09104, P22694, P31749
FGR	SP_PIR_KEYWORDS	kinase	1.3431351173180284E-7	Q8NHU3, Q15208, P12277, P60891, Q8N4C8, P17252, P31751, P00533, Q99704, P09769, P22694, P31749
FGR	SP_PIR_KEYWORDS	cytoplasm	1.3567061233264884E-7	Q9NPI6, P20929, P62633, Q15208, P12277, Q9Y6D9, Q9Y490, P17987, P17252, P14923, P06744, Q99704, P35222, Q12955, Q9UBT7, O15371, O75161, Q9H3M7, P09104, O43312, P04792, P22694, P31749
FGR	UP_SEQ_FEATURE	binding site:ATP	1.5732206938138209E-7	Q15208, P12277, P60891, Q8N4C8, P17252, P31751, P00533, P09769, P22694, Q9H4M9, P31749
FGR	SP_PIR_KEYWORDS	nucleotide-binding	9.185686036394066E-7	P07437, Q71U36, P12277, Q15208, Q8N4C8, P17987, P17252, Q9H4M9, P68371, P60891, P68366, P31751, P00533, P09769, P22694, P31749
FGR	KEGG_PATHWAY	hsa04540:Gap junction	2.5351616986865673E-6	P07437, Q71U36, P68366, P17252, P00533, P22694, P68371
FGR	KEGG_PATHWAY	hsa05130:Pathogenic Escherichia coli infection	5.349171709513547E-6	P07437, Q71U36, P68366, P17252, P35222, P68371
FGR	UP_SEQ_FEATURE	domain:AGC-kinase C-terminal	5.741432930739736E-6	Q15208, P17252, P31751, P22694, P31749
FGR	GOTERM_CC_FAT	GO:0005856~cytoskeleton	6.003576068347583E-6	P07437, P20929, Q71U36, Q9Y6D9, Q9Y490, P17987, P14923, P35222, P68371, Q12955, P68366, Q9UBT7, O75161, O43312, P04792, P31749
FRK	SP_PIR_KEYWORDS	cytoplasm	8.3710903442067E-10	Q9UGI8, O14744, P43686, P35998, P25788, P05783, P42680, P42685, Q8WWF8, O15304, Q9HAV4, Q96Q15, P10636, Q9UBC9, Q96QV1, P15941, Q8IYM9, P49454, Q9P1U1, P55795, Q14204, Q53EL6, P50748, P58340, Q8WYP3
FRK	SP_PIR_KEYWORDS	phosphoprotein	3.6560387095962243E-6	P43686, Q9UGI8, P25788, P05783, P31943, P42680, Q8TA86, P42685, Q9UJF2, Q9HAV4, O15304, Q96Q15, P10636, P15260, Q96CW6, P17948, P15941, P49454, Q8N3U4, Q9P1U1, P55795, P54764, Q01543, Q14204, Q12996, Q53EL6, P50748, P23229, P58340, Q8WYP3
FRK	SP_PIR_KEYWORDS	nucleus	3.853568833817814E-6	O14744, P43686, P35998, Q99581, P25788, Q9H8G1, P15941, Q8IYM9, P31943, P49454, Q8N3U4, P55795, Q9NYW8, Q8TA86, Q01543, Q12996, Q53EL6, Q9HAV4, O15304, Q96Q15, P50748, P17030, P58340
FRK	GOTERM_CC_FAT	GO:0005856~cytoskeleton	3.995323130068055E-5	P10636, Q9P1U1, P15260, P55795, P25788, Q14204, P05783, P50748, P31943, P49454, Q8N3U4
FRK	GOTERM_BP_FAT	GO:0000278~mitotic cell cycle	3.9084245445165873E-4	P35998, P43686, P25788, Q14204, P50748, P49454, Q8N3U4
FRK	GOTERM_BP_FAT	GO:0022402~cell cycle process	6.198324820091158E-4	P35998, P43686, P25788, Q14204, P50748, P49454, Q8N3U4, P58340
FRK	GOTERM_BP_FAT	GO:0007049~cell cycle	8.14170693666807E-4	P35998, P43686, P25788, Q14204, P05783, P50748, P49454, Q8N3U4, P58340
FRK	UP_SEQ_FEATURE	repeat:2-1	0.00118155	P55795, P31943, P49454
FRK	UP_SEQ_FEATURE	repeat:1-2	0.00127836	P55795, P31943, P49454
FRK	UP_SEQ_FEATURE	repeat:2-2	0.00137885	P55795, P31943, P49454
GRAP2	SP_PIR_KEYWORDS	disease mutation	0.002815	O75665, Q99836, P17302, P35913, Q9NZC7, Q9UBC3
GRAP2	GOTERM_MF_FAT	GO:0005123~death receptor binding	0.00928406	Q99836, Q8WXG6
GRAP2	GOTERM_MF_FAT	GO:0050662~coenzyme binding	0.00978723	Q9NX74, O60547, Q9NZC7
GRAP2	GOTERM_MF_FAT	GO:0048037~cofactor binding	0.0179767	Q9NX74, O60547, Q9NZC7
GRAP2	UP_SEQ_FEATURE	domain:Death	0.0235533	Q99836, Q8WXG6
GRAP2	GOTERM_MF_FAT	GO:0032813~tumor necrosis factor receptor superfamily binding	0.0259637	Q99836, Q8WXG6
GRAP2	GOTERM_BP_FAT	GO:0009628~response to abiotic stimulus	0.0472284	P17302, P35913, Q9UBC3
GRAP2	SP_PIR_KEYWORDS	phosphoprotein	0.0711565	Q9BZD4, O75665, P17302, P49790, Q00872, Q8WXG6, Q9NX74, Q15029, Q9NZC7
GRAP2	BIOCARTA	h_gsk3Pathway:Inactivation of Gsk3 by AKT causes accumulation of b-catenin in Alveolar Macrophages	0.0783922	Q99836, P17302
GRAP2	GOTERM_BP_FAT	GO:0043123~positive regulation of I-kappaB kinase/NF-kappaB cascade	0.0893453	Q99836, P17302
GRB10	SP_PIR_KEYWORDS	cytoplasm	3.816420217580096E-7	P35790, Q8WUY3, Q05BV3, Q02880, P42224, Q8WZ42, P52565, P52566, P34896, O43150, O00507, O43813, P09327, Q93008, Q13813, Q9Y237, Q5VWQ8, P29350, O75083, Q7Z5J4, Q3I5F7, O15117, Q9UPY3, Q8TDY2
GRB10	GOTERM_BP_FAT	GO:0007166~cell surface receptor linked signal transduction	2.4396698155047867E-5	Q8NH37, P42224, Q9H340, Q6IF00, P18433, O00507, O43813, Q93008, P49795, P07550, Q8NGX2, P29350, P32297, P15498, Q8NGV0, Q13322, P08172, Q96R27
GRB10	GOTERM_CC_FAT	GO:0005886~plasma membrane	3.843624184003836E-5	Q8NH37, Q9H340, P52565, Q8WUD1, Q6IF00, P18433, O43150, O43813, Q8WXA8, Q9Y2P4, Q13813, P49795, Q8NGX2, P61106, P07550, P32297, P15498, Q8NGV0, Q13322, P08172, P28827, Q96R27, P46821, Q9UHW9
GRB10	GOTERM_CC_FAT	GO:0030425~dendrite	9.93923465234465E-5	P07550, P32297, P42224, P08172, P46821, P78509
GRB10	SP_PIR_KEYWORDS	receptor	2.568874677056367E-4	Q8NH37, Q9H340, Q6IF00, P18433, Q8WXA8, P07550, Q8NGX2, P29350, P32297, Q8NGV0, P08172, P28827, Q96R27
GRB10	GOTERM_MF_FAT	GO:0030695~GTPase regulator activity	2.820952639120424E-4	Q5VWQ8, P15498, Q8N4C8, Q8WZ42, P52565, P52566, Q96PV0, O43150
GRB10	GOTERM_MF_FAT	GO:0060589~nucleoside-triphosphatase regulator activity	3.225076300395071E-4	Q5VWQ8, P15498, Q8N4C8, Q8WZ42, P52565, P52566, Q96PV0, O43150
GRB10	GOTERM_CC_FAT	GO:0043005~neuron projection	4.0491609691515815E-4	P07550, P32297, P42224, P08172, P46821, Q9UHW9, P78509
GRB10	GOTERM_MF_FAT	GO:0043176~amine binding	4.261152149295437E-4	P35790, P07550, P32297, P34896, P08172
GRB10	SP_PIR_KEYWORDS	GTPase activation	5.598831871739743E-4	Q5VWQ8, P52565, P52566, Q96PV0, O43150
GRB14	SP_PIR_KEYWORDS	cytoplasm	4.7123448207062586E-11	O95405, Q14449, Q8IXJ6, P55060, Q9H467, P08865, P42681, O15530, Q9Y4P1, Q13615, O75083, Q9UGP4, Q9BW04, Q99996, P22626, P05787, Q8IZP0, O00507, Q14511, Q9BXI3, Q93008, Q13813, P55795, Q86TB9, P42025, Q9HBL0, Q9NYJ8, Q86YR5, Q8WYP3
GRB14	SP_PIR_KEYWORDS	phosphoprotein	1.3422700638487573E-7	Q14449, Q8IXJ6, P07333, P32927, P30613, Q9UP95, Q8WXG6, P08865, Q9UMD9, P42681, O15530, Q9H792, Q9Y4P1, Q13615, P55011, O75083, Q9UGP4, Q76FK4, Q99996, Q96JQ2, P22626, Q8N4C8, P05787, Q8IZP0, Q16288, Q14511, Q93008, Q13813, P55795, P35968, Q86TB9, Q9HBL0,
GRB14	SP_PIR_KEYWORDS	kinase	3.05761762934938E-5	P42681, Q99996, P35968, O15530, P07333, P30613, Q9H792, Q8N4C8, Q8WXG6, Q16288
GRB14	SP_PIR_KEYWORDS	nucleotide-binding	1.1132624258791078E-4	Q99996, P07333, P30613, Q8N4C8, Q16288, Q9BXI3, O14966, Q9UBJ2, Q9Y2P4, P42681, P35968, O15530, Q9H792, P42025
GRB14	INTERPRO	IPR008266:Tyrosine protein kinase, active site	1.340078402550171E-4	P42681, P35968, P07333, Q9H792, Q16288
GRB14	SP_PIR_KEYWORDS	tyrosine-protein kinase	1.4219522707184648E-4	P42681, P35968, P07333, Q9H792, Q16288
GRB14	INTERPRO	IPR004842:Na/K/Cl co-transporter superfamily	1.48550342340325E-4	Q13621, P55011, Q9UP95
GRB14	GOTERM_BP_FAT	GO:0006468~protein amino acid phosphorylation	1.6805258217800946E-4	P42681, Q99996, P35968, O15530, P07333, Q9H792, Q8N4C8, Q8WXG6, Q8IZP0, Q16288
GRB14	INTERPRO	IPR017441:Protein kinase, ATP binding site	2.000975406959073E-4	P42681, Q99996, P35968, O15530, P07333, Q9H792, Q8N4C8, Q16288
GRB14	SP_PIR_KEYWORDS	tyrosine-specific protein kinase	2.053108517141841E-4	P42681, P35968, P07333, Q16288
GRB2	SP_PIR_KEYWORDS	phosphoprotein	1.6832432533769786E-10	Q9H0D6, Q8WXG6, Q9Y2L5, Q15029, P13535, Q96PY5, Q13362, P62993, P11217, P40879, Q9NUQ6, O75665, Q9NZC7, Q8TAF3, Q86UV5, Q9BZD4, P20336, Q8IVF7, Q9BXP5, Q9H3D4, Q9Y2U5, Q9NZW5, Q7Z5J4, O15350, O95466, Q99759, O14646
GRB2	UP_SEQ_FEATURE	domain:GBD/FH3	1.0487103305135165E-4	Q96PY5, Q8IVF7, O95466
GRB2	UP_SEQ_FEATURE	domain:FH2	1.9951135603908665E-4	Q96PY5, Q8IVF7, O95466
GRB2	INTERPRO	IPR003104:Actin-binding FH2 and DRF autoregulatory	2.1070588096752652E-4	Q96PY5, Q8IVF7, O95466
GRB2	INTERPRO	IPR015425:Actin-binding FH2	2.4288884897379458E-4	Q96PY5, Q8IVF7, O95466
GRB2	SMART	SM00498:FH2	3.7198967673181076E-4	Q96PY5, Q8IVF7, O95466
GRB2	GOTERM_MF_FAT	GO:0003779~actin binding	0.00137526	Q96PY5, Q8IVF7, Q9UKX2, O95466, P13535
GRB2	GOTERM_MF_FAT	GO:0017048~Rho GTPase binding	0.00153312	Q96PY5, Q8IVF7, O95466
GRB2	PIR_SUPERFAMILY	PIRSF038176:mitogen-activated protein kinase kinase kinase, types 2/3	0.00189215	Q9Y2U5, Q99759
GRB2	SP_PIR_KEYWORDS	alternative splicing	0.00324663	Q9NUQ6, O75665, Q9H0D6, Q8WXG6, Q9Y2L5, Q9NZC7, Q8TAF3, Q86UV5, Q96PY5, Q8IVF7, Q13362, Q9BXP5, P62993, Q9H3D4, Q7Z5J4, O15350, O95466, Q99759, O14646
HCK	SP_PIR_KEYWORDS	phosphoprotein	6.290503741986184E-14	Q9NPI6, Q9UGI8, P29317, Q8WZ42, Q9UQB3, Q14997, P08865, P31943, Q6T4R5, Q9Y4I1, Q9NRM7, P46109, P61106, P29474, P08631, Q9UPY3, O95714, Q9UFW8, Q07157, P41279, Q99996, Q9Y3M8, Q8N4C8, Q6IQ23, O95822, P52948, O94986, P10721, Q92835, P55795, Q96RF0, O76090,
HCK	INTERPRO	IPR017441:Protein kinase, ATP binding site	3.8196609230953383E-7	P41279, P10721, Q9NRM7, Q99996, P29317, Q8N4C8, Q8WZ42, Q7KZI7, P08631, Q99570
HCK	INTERPRO	IPR000719:Protein kinase, core	5.576478388990181E-7	P41279, P10721, Q9NRM7, Q99996, P29317, Q8N4C8, Q8WZ42, Q7KZI7, P08631, Q99570
HCK	GOTERM_MF_FAT	GO:0004672~protein kinase activity	8.300668259675992E-7	P41279, P10721, Q9NRM7, P46109, Q99996, P29317, Q8N4C8, Q8WZ42, Q7KZI7, P08631, Q99570
HCK	GOTERM_CC_FAT	GO:0005829~cytosol	1.980768369195677E-6	P41279, Q99996, Q8WZ42, O95822, P08865, O94986, P63173, P55795, Q92835, P61106, P62314, O76090, P29474, O14713, Q99570
HCK	UP_SEQ_FEATURE	nucleotide phosphate-binding region:ATP	2.26627784612612E-6	P41279, P10721, Q9NRM7, Q9Y4I1, P29317, Q9UNY4, Q8N4C8, Q8WZ42, Q7KZI7, P08631, Q9UPY3, Q99570
HCK	GOTERM_MF_FAT	GO:0000166~nucleotide binding	2.3591292174254155E-6	P41279, P29317, Q99996, Q8WZ42, Q8N4C8, P31943, Q9NRM7, Q9Y4I1, P10721, P55795, P61106, Q9UNY4, P29474, O15042, Q7KZI7, P08631, Q9UPY3, Q99570
HCK	UP_SEQ_FEATURE	domain:Protein kinase	3.903952579249647E-6	P41279, P10721, Q9NRM7, P29317, Q8N4C8, Q8WZ42, Q7KZI7, P08631, Q99570
HCK	SP_PIR_KEYWORDS	kinase	7.35599183285343E-6	P41279, P10721, Q9NRM7, Q99996, P29317, Q8N4C8, Q8WZ42, Q7KZI7, P08631, Q99570
HCK	SP_PIR_KEYWORDS	atp-binding	7.46743450290366E-6	P41279, P29317, Q99996, Q8WZ42, Q8N4C8, Q9NRM7, Q9Y4I1, P10721, Q9UNY4, P08631, Q7KZI7, Q9UPY3, Q99570
INPPL1	SP_PIR_KEYWORDS	cytoplasm	4.081583404744429E-7	Q9NPI6, Q15283, Q9H467, Q8WZ42, Q9P225, Q86UR1, Q86T24, O00507, O15357, Q9NTJ3, Q93008, Q04656, Q8WWQ8, P57737, O75161, Q7L591, Q9NP31, Q9P258, Q7Z3Y8, Q9BVQ7, O95171, Q9Y573, Q96AC1
INPPL1	SP_PIR_KEYWORDS	cell membrane	4.592219128201445E-5	Q8IZF3, P43627, P43626, Q86UR1, Q8WUD1, Q6IF00, Q03135, Q04656, P61106, Q8NGX2, P30926, Q8WWQ8, Q8NGG4, Q7KZI7, Q7L591, Q96R27, Q9HAR2
INPPL1	GOTERM_CC_FAT	GO:0005886~plasma membrane	5.011805893779717E-4	P53794, Q8IZF3, O14763, P43627, O14745, P43626, Q86UR1, Q8WUD1, Q6IF00, Q86T24, Q03135, Q04656, Q8NGX2, P61106, P30926, Q8WWQ8, Q8NGG4, Q7KZI7, Q7L591, Q96R27, Q9HAR2, Q9UHW9, Q96AC1
INPPL1	SP_PIR_KEYWORDS	membrane	0.00135613	P53794, Q8IZF3, O14763, O14745, Q86UR1, Q8WUD1, O15357, Q03135, Q8NGX2, P61106, Q7L591, P43627, P43626, Q6IF00, P52948, Q04656, P30926, Q8N1I0, Q8WWQ8, P57737, Q8NGG4, Q7KZI7, Q96R27, O95171, Q9HAR2, Q9UHW9
INPPL1	SP_PIR_KEYWORDS	phosphoprotein	0.00208038	Q9NPI6, O14745, Q8WZ42, Q9P225, Q86UR1, O15357, Q9NTJ3, Q03135, Q96PY6, P61106, Q7L591, Q9NP31, Q9P258, P61313, Q96AC1, Q86T24, Q93008, P52948, Q04656, Q15746, Q8N1I0, Q8WWQ8, P57737, Q7KZI7, O95171, Q9HAR2, Q9UHW9
INPPL1	GOTERM_BP_FAT	GO:0000280~nuclear division	0.00358403	Q96PY6, Q8WZ42, Q9P258, Q9NTJ3, Q93008
INPPL1	GOTERM_BP_FAT	GO:0007067~mitosis	0.00358403	Q96PY6, Q8WZ42, Q9P258, Q9NTJ3, Q93008
INPPL1	GOTERM_BP_FAT	GO:0000087~M phase of mitotic cell cycle	0.00382218	Q96PY6, Q8WZ42, Q9P258, Q9NTJ3, Q93008
INPPL1	GOTERM_BP_FAT	GO:0048285~organelle fission	0.00413475	Q96PY6, Q8WZ42, Q9P258, Q9NTJ3, Q93008
INPPL1	UP_SEQ_FEATURE	short sequence motif:SH3-binding	0.00680747	Q8N1I0, Q9NP31, O15357
ITK	GOTERM_CC_FAT	GO:0005829~cytosol	2.653489667134624E-14	O00170, Q9P243, P31321, P17252, Q8WUM4, P19174, Q01970, Q7Z7A1, P55196, Q08881, Q13480, O75674, P27986, Q92569, P15498, P60891, O00459, P22694, P25098, Q9UK41, Q9UJU6
ITK	SP_PIR_KEYWORDS	phosphoprotein	6.335364484123447E-10	O00170, P04406, Q14289, P17252, Q01970, Q15303, P55196, Q02224, O75674, P27986, Q92569, Q00610, P17661, P22694, P25098, Q9UJU6, Q9Y3M8, P31321, O14879, Q8WUM4, Q13191, P19174, Q7Z7A1, Q99704, Q93009, Q8IZD4, Q08881, Q13480, P15498, P09211, O00459, P42331
ITK	SP_PIR_KEYWORDS	acetylation	1.665541354251699E-8	O00170, P04406, P31321, P17252, Q8WUM4, P19174, Q01970, Q9NUV9, Q99704, Q93009, Q8IZD4, Q08881, P27986, P60891, P09211, P15498, Q00610, P22694, P25098, Q9UJU6
ITK	KEGG_PATHWAY	hsa04670:Leukocyte transendothelial migration	2.430342701212554E-8	P55196, Q08881, P27986, Q92569, P15498, Q14289, P17252, P19174, O00459
ITK	SP_PIR_KEYWORDS	SH2 domain	4.564156404668297E-8	Q08881, P27986, Q92569, P15498, Q13191, P19174, O00459
ITK	KEGG_PATHWAY	hsa04012:ErbB signaling pathway	6.605070248777462E-8	Q13480, P27986, Q92569, P17252, Q13191, P19174, O00459, Q15303
ITK	INTERPRO	IPR000980:SH2 motif	1.0590656070420797E-7	Q08881, P27986, Q92569, P15498, Q13191, P19174, O00459
ITK	SMART	SM00252:SH2	5.500626549440632E-7	Q08881, P27986, Q92569, P15498, Q13191, P19174, O00459
ITK	UP_SEQ_FEATURE	domain:SH2 2	6.691197479487368E-7	P27986, Q92569, P19174, O00459
ITK	UP_SEQ_FEATURE	domain:SH2 1	6.691197479487368E-7	P27986, Q92569, P19174, O00459
LCK	SP_PIR_KEYWORDS	phosphoprotein	1.7894223324297614E-9	Q9NPI6, P29317, P06239, Q71U36, Q9Y3P8, P16157, P18433, Q9Y4I1, Q9NRM7, Q96F86, P61106, O15530, P68366, P11217, Q9BYB0, P62906, Q7L591, Q8WU20, Q9UPY3, Q07157, P41279, O60242, Q99996, Q9C0B5, Q12913, Q8N4C8, Q9UGN4, O94986, Q13813, Q9NT99, Q92835, Q8N1I0,
LCK	SP_PIR_KEYWORDS	nucleotide-binding	3.200440288164017E-5	P41279, P29317, Q99996, P06239, Q71U36, Q8N4C8, Q8WUD1, P62195, Q9NRM7, Q9Y4I1, P61106, O15530, P11217, P68366, Q9UPY3
LCK	SP_PIR_KEYWORDS	membrane	3.72954450740548E-5	P29317, P06239, Q9Y3P8, Q8WUD1, P16157, P18433, Q5SZK8, P61106, O15530, Q9BYB0, Q7L591, Q8WU20, P50281, O43747, Q07157, O60242, Q9C0B5, Q12913, Q9UGN4, Q9NR96, Q9NT99, Q92835, Q8N1I0, P08908, O43451, O76090, Q9Y666, Q8NFY4, Q6IFG1, Q9UHW9
LCK	UP_SEQ_FEATURE	domain:SH3	7.205555995236479E-5	P20929, P06239, Q8N1I0, Q9BYB0, Q13813, Q07157
LCK	GOTERM_CC_FAT	GO:0044459~plasma membrane part	1.0390566385667441E-4	P29317, P06239, Q9Y3P8, Q12913, Q8WUD1, P16157, P18433, Q13813, Q5SZK8, P61106, P08908, O76090, Q9Y666, Q9BYB0, Q8WU20, Q7L591, P50281, O43747, Q9UHW9, Q07157
LCK	GOTERM_CC_FAT	GO:0005886~plasma membrane	1.2121086720199519E-4	P29317, P06239, Q9Y3P8, Q8WUD1, P16157, P18433, Q5SZK8, P61106, O15530, Q9BYB0, Q7L591, Q8WU20, P50281, O43747, Q07157, O60242, Q12913, Q9UGN4, Q13813, Q9NR96, O43451, O76090, P08908, Q9Y666, Q8NFY4, Q6IFG1, Q9UHW9
LCK	SP_PIR_KEYWORDS	cell membrane	1.4636656002948854E-4	O60242, P06239, Q9Y3P8, Q9UGN4, Q8WUD1, Q5SZK8, Q9NT99, P61106, O43451, O76090, P08908, Q9BYB0, Q8NFY4, Q6IFG1, Q7L591, Q07157
LCK	SP_PIR_KEYWORDS	sh3 domain	1.562450100140215E-4	P20929, P06239, Q8N1I0, Q9BYB0, Q13813, Q07157
LCK	GOTERM_CC_FAT	GO:0005829~cytosol	1.5842131609238236E-4	P41279, Q99996, P06239, Q71U36, O94986, Q13813, Q92835, P61106, O76090, P36871, O15530, P68366, P62906, O14713, O43747
LCK	INTERPRO	IPR001452:Src homology-3 domain	2.627445926320648E-4	P20929, P06239, Q8N1I0, Q9BYB0, Q13813, Q07157
LYN	SP_PIR_KEYWORDS	phosphoprotein	2.5409513136193747E-8	Q9NPI6, P29317, Q04695, Q8WZ42, P11387, Q6DN12, Q92845, Q96PY6, P58107, Q8NF91, P09104, Q08357, O95714, Q9UFW8, O75575, P07948, Q99996, Q9Y6R1, Q6EMB2, Q8N4C8, Q6IQ23, P19525, P35900, Q9NT99, P36871, Q14204, O15371, P57737, Q7KZI7, O14713, Q53GS9
LYN	SP_PIR_KEYWORDS	cytoplasm	1.363194441543205E-6	Q9NPI6, P20929, Q99996, Q9NPH2, Q04695, Q6EMB2, Q9H467, Q8WZ42, P35900, P58107, Q8NF91, P36871, Q14204, O15371, P57737, P02533, O75161, P09104, O14713, P07948
LYN	GOTERM_CC_FAT	GO:0005856~cytoskeleton	1.4036357948175617E-5	P20929, Q99996, Q04695, Q6EMB2, Q8WZ42, Q92845, P35900, Q8NF91, P58107, Q14204, P02533, O75161, P07948
LYN	GOTERM_CC_FAT	GO:0044430~cytoskeletal part	1.903194251263287E-5	P35900, P20929, Q99996, Q04695, Q6EMB2, Q14204, Q8WZ42, P02533, O75161, Q92845, P07948
LYN	INTERPRO	IPR017441:Protein kinase, ATP binding site	3.0734132912409534E-5	Q96PY6, Q99996, P29317, Q8N4C8, Q8WZ42, P19525, Q7KZI7, P07948
LYN	INTERPRO	IPR000719:Protein kinase, core	4.097894211952312E-5	Q96PY6, Q99996, P29317, Q8N4C8, Q8WZ42, P19525, Q7KZI7, P07948
LYN	UP_SEQ_FEATURE	mutagenesis site	4.994951387641971E-5	Q9NPI6, P29317, P43627, Q9Y6R1, Q04695, P43626, Q8WZ42, P11387, P19525, P35900, Q8NF91, Q7KZI7, O14713, Q08357, P07948
LYN	UP_SEQ_FEATURE	active site:Proton acceptor	1.9397196576973199E-4	Q96PY6, P29317, Q8N4C8, Q8WZ42, P19525, Q7KZI7, P09104, P07948
LYN	UP_SEQ_FEATURE	domain:Protein kinase	2.203935126789137E-4	Q96PY6, P29317, Q8N4C8, Q8WZ42, P19525, Q7KZI7, P07948
LYN	SP_PIR_KEYWORDS	kinase	2.45183277812519E-4	Q96PY6, Q99996, P29317, Q8N4C8, Q8WZ42, P19525, Q7KZI7, P07948
MATK	SP_PIR_KEYWORDS	phosphoprotein	8.27478121970877E-9	Q9NPI6, Q9UGI8, O95248, P42224, P62750, Q8WZ42, Q9UQB3, P35221, Q6R327, P23588, P61106, P29474, Q8NHL6, O75914, Q14258, O75575, Q9BZ29, O15297, P78324, Q9Y2E6, Q9Y2X3, Q6PL18, Q9C0B9, Q99708, Q9BUQ8, P09884, Q14511, Q14517, Q7Z6E9, Q07954, Q92499, O76090,
MATK	GOTERM_MF_FAT	GO:0000166~nucleotide binding	4.213768059259958E-5	Q14410, P62750, Q8WZ42, Q6PL18, Q9BUQ8, P09884, P23588, P61106, Q92499, P60891, P29474, P40616, Q9UK32, P42679, P21860, O75914, O75575, Q9BZ29, O14647
MATK	UP_SEQ_FEATURE	nucleotide phosphate-binding region:ATP	6.350915274004674E-5	Q14410, Q92499, P60891, Q8WZ42, Q6PL18, Q9UK32, Q9BUQ8, P42679, P21860, O75914, O14647
MATK	GOTERM_CC_FAT	GO:0044459~plasma membrane part	7.202755153407948E-5	Q9UGI8, Q14410, Q9UQB3, P35221, Q14511, Q14517, Q8TAD4, Q07954, P61106, O76090, P29474, P40616, P21860, O75575, Q14258, O43747, P02549, P21817
MATK	GOTERM_CC_FAT	GO:0009898~internal side of plasma membrane	3.0834370025126684E-4	P61106, Q14410, P40616, P35221, O75575, O43747, P02549
MATK	GOTERM_CC_FAT	GO:0005829~cytosol	3.1551614653575326E-4	O14921, P62750, Q8WZ42, Q6R327, P23588, P61106, P62314, O76090, P60891, P62424, P29474, O43747, P02549
MATK	SP_PIR_KEYWORDS	nucleotide-binding	3.682919608195694E-4	Q14410, Q8WZ42, Q6PL18, Q9BUQ8, P61106, Q92499, P60891, Q9UK32, P40616, P42679, P21860, O75914, O14647
MATK	SP_PIR_KEYWORDS	atp-binding	8.085125512400122E-4	Q14410, Q92499, P60891, Q8WZ42, Q6PL18, Q9UK32, Q9BUQ8, P42679, P21860, O75914, O14647
MATK	GOTERM_CC_FAT	GO:0005912~adherens junction	0.00111398	Q9UGI8, Q9UQB3, P35221, Q14511, Q14258
MATK	GOTERM_MF_FAT	GO:0017076~purine nucleotide binding	0.00118417	Q14410, Q8WZ42, Q6PL18, Q9BUQ8, P61106, Q92499, P60891, P29474, Q9UK32, P40616, P42679, P21860, O75914, O14647, Q9BZ29
NCK1	INTERPRO	IPR002453:Beta tubulin	1.5418640242037377E-21	Q13509, P04350, P07437, Q9BVA1, Q13885, Q9BUF5, P68371, Q9H4B7
NCK1	INTERPRO	IPR013838:Beta tubulin, autoregulation binding site	1.4844181263886636E-19	Q13509, P04350, P07437, Q9BVA1, Q13885, Q9BUF5, P68371, Q9H4B7
NCK1	GOTERM_BP_FAT	GO:0043623~cellular protein complex assembly	4.985100627769899E-19	Q13509, P04350, P07437, Q9BVA1, Q13885, P16333, Q9BUF5, P52948, P68371, Q9H4B7, Q03135
NCK1	INTERPRO	IPR018316:Tubulin/FtsZ, 2-layer sandwich domain	7.947312206643644E-19	Q13509, P04350, P07437, Q9BVA1, Q13885, Q9BUF5, P68371, Q9H4B7
NCK1	INTERPRO	IPR017975:Tubulin, conserved site	1.1421514585229984E-18	Q13509, P04350, P07437, Q9BVA1, Q13885, Q9BUF5, P68371, Q9H4B7
NCK1	INTERPRO	IPR000217:Tubulin	1.6120614167005672E-18	Q13509, P04350, P07437, Q9BVA1, Q13885, Q9BUF5, P68371, Q9H4B7
NCK1	INTERPRO	IPR003008:Tubulin/FtsZ, GTPase domain	1.6120614167005672E-18	Q13509, P04350, P07437, Q9BVA1, Q13885, Q9BUF5, P68371, Q9H4B7
NCK1	GOTERM_BP_FAT	GO:0051258~protein polymerization	2.6560291886023263E-18	Q13509, P04350, P07437, Q9BVA1, Q13885, Q9BUF5, P68371, Q9H4B7, Q03135
NCK1	GOTERM_BP_FAT	GO:0034621~cellular macromolecular complex subunit organization	3.7151222288927884E-18	Q13509, P04350, P07437, Q9BVA1, Q13885, P16333, Q9BUF5, P52948, P68371, Q9H4B7, Q03135, O00401
NCK1	KEGG_PATHWAY	hsa05130:Pathogenic Escherichia coli infection	1.4327361264257392E-17	Q13509, P04350, P07437, Q9BVA1, Q13885, P16333, Q9BUF5, P68371, Q9H4B7, O00401
NCK2	SP_PIR_KEYWORDS	kinase	1.3534499518426E-11	Q13131, P49841, Q9H2X6, Q96PY6, P53350, Q16644, P54646, P60891, P09619, Q86Z02, P49840, Q8TDY2, Q05513
NCK2	UP_SEQ_FEATURE	binding site:ATP	2.6825663440582395E-11	Q13131, Q96PY6, P53350, Q16644, P09619, P49841, P60891, P54646, Q9H2X6, Q86Z02, P49840, Q05513
NCK2	INTERPRO	IPR002290:Serine/threonine protein kinase	7.595248995889969E-11	Q13131, Q96PY6, P53350, Q16644, P49841, P54646, Q9H2X6, Q86Z02, P49840, Q05513
NCK2	UP_SEQ_FEATURE	domain:Protein kinase	1.6910680749880627E-10	Q13131, Q96PY6, P53350, Q16644, P09619, P49841, P54646, Q9H2X6, Q86Z02, P49840, Q05513
NCK2	UP_SEQ_FEATURE	active site:Proton acceptor	2.1289291011824073E-10	Q13131, Q96PY6, P53350, Q8IXJ6, Q16644, P09619, P49841, P54646, Q9H2X6, Q86Z02, P49840, Q05513
NCK2	GOTERM_CC_FAT	GO:0005856~cytoskeleton	2.427895739413504E-10	P20929, P04083, Q8IXJ6, Q9Y281, Q9H2X6, O15357, P53350, Q9BVA1, Q86Z02, P17661, P13796, P04792, Q9H4B7, Q96AC1, Q05513, O00401
NCK2	SMART	SM00220:S_TKc	4.233845490537675E-10	Q13131, Q96PY6, P53350, Q16644, P49841, P54646, Q9H2X6, Q86Z02, P49840, Q05513
NCK2	INTERPRO	IPR017441:Protein kinase, ATP binding site	4.740876240627854E-10	Q13131, Q96PY6, P53350, Q16644, P09619, P49841, P54646, Q9H2X6, Q86Z02, P49840, Q05513
NCK2	SP_PIR_KEYWORDS	serine/threonine-protein kinase	6.595997121924663E-10	Q13131, Q96PY6, P53350, Q16644, P49841, P54646, Q9H2X6, Q86Z02, P49840, Q05513
NCK2	INTERPRO	IPR000719:Protein kinase, core	7.346759956520191E-10	Q13131, Q96PY6, P53350, Q16644, P09619, P49841, P54646, Q9H2X6, Q86Z02, P49840, Q05513
PTK6	SP_PIR_KEYWORDS	phosphoprotein	6.319760627176402E-12	P56715, Q9NPI6, P20963, Q9UPN6, Q9UK59, P29317, Q13882, P21675, Q9UPR0, Q6T4R5, P35222, Q96PY6, P42681, Q02763, P53350, P49961, P40259, Q68CJ6, Q13131, P27695, Q13835, Q9UIB8, Q9UGN4, Q96RT1, P10721, P03372, Q15746, Q14204, O15164, Q9UJV9, O14647, Q05513,
PTK6	SP_PIR_KEYWORDS	atp-binding	1.6005738732105277E-10	Q13131, P29317, Q13882, P21675, Q96PY6, P10721, Q02763, P42681, P53350, Q15746, P49961, Q14204, Q9NVP1, Q9UJV9, O60488, O14647, Q05513
PTK6	SP_PIR_KEYWORDS	nucleotide-binding	5.399923467627037E-10	Q13131, P29317, Q13882, P21675, P10721, Q96PY6, Q02763, P42681, P53350, Q15746, P49961, Q14204, Q68CJ6, Q9NVP1, Q9UJV9, O60488, O14647, Q05513
PTK6	GOTERM_MF_FAT	GO:0005524~ATP binding	2.7886258141356564E-9	Q13131, P29317, Q13882, P21675, Q96PY6, P10721, Q02763, P42681, P53350, Q15746, P49961, Q14204, Q9NVP1, Q9UJV9, O60488, O14647, Q05513
PTK6	GOTERM_MF_FAT	GO:0032559~adenyl ribonucleotide binding	3.4009245397241037E-9	Q13131, P29317, Q13882, P21675, Q96PY6, P10721, Q02763, P42681, P53350, Q15746, P49961, Q14204, Q9NVP1, Q9UJV9, O60488, O14647, Q05513
PTK6	UP_SEQ_FEATURE	nucleotide phosphate-binding region:ATP	4.246934930094683E-9	Q13131, P29317, Q13882, Q96PY6, P10721, P42681, Q02763, P53350, Q15746, Q14204, Q9NVP1, Q9UJV9, O14647, Q05513
PTK6	GOTERM_MF_FAT	GO:0030554~adenyl nucleotide binding	7.31304962970796E-9	Q13131, P29317, Q13882, P21675, Q96PY6, P10721, Q02763, P42681, P53350, Q15746, P49961, Q14204, Q9NVP1, Q9UJV9, O60488, O14647, Q05513
PTK6	GOTERM_MF_FAT	GO:0001883~purine nucleoside binding	9.124382246348386E-9	Q13131, P29317, Q13882, P21675, Q96PY6, P10721, Q02763, P42681, P53350, Q15746, P49961, Q14204, Q9NVP1, Q9UJV9, O60488, O14647, Q05513
PTK6	GOTERM_MF_FAT	GO:0001882~nucleoside binding	1.0085932359162361E-8	Q13131, P29317, Q13882, P21675, Q96PY6, P10721, Q02763, P42681, P53350, Q15746, P49961, Q14204, Q9NVP1, Q9UJV9, O60488, O14647, Q05513
PTK6	GOTERM_MF_FAT	GO:0004672~protein kinase activity	1.3789615546558582E-8	P10721, Q13131, Q96PY6, Q02763, P42681, P53350, P29317, Q15746, Q13882, P21675, O15164, Q05513
SH2B	SP_PIR_KEYWORDS	cytoplasm	4.6836943464008815E-15	Q9NYB9, Q13045, Q8TE02, Q8WZ42, Q9H467, P27797, P08865, O95954, Q9NRM7, P42681, Q86WV1, Q9NRF2, O15530, Q8WXH0, O60716, Q06124, P50542, P61978, Q9H4G0, P04083, P52298, Q9BX66, P40337, P41252, P21333, Q13813, O75874, O75563, Q96JZ2, O94921, O15117, P55957,
SH2B	SP_PIR_KEYWORDS	phosphoprotein	1.0999999307786318E-10	Q9NYB9, Q13045, Q8WZ42, Q9H3S7, P40692, P08865, O95954, Q9NRM7, P42681, Q86WV1, Q9NRF2, O15530, P14625, Q8WXH0, P32239, O60716, Q06124, P61978, Q9H4G0, P04083, P78324, P52298, Q9BX66, P41252, P21333, Q14008, Q13813, Q15746, Q9P2N2, O75563, A0MZ66, Q96JZ2,
SH2B	GOTERM_CC_FAT	GO:0005829~cytosol	1.9060821727174276E-10	Q9NYB9, Q9H4G0, P52298, Q8WZ42, Q9BX66, P41252, P40337, P27797, P21333, Q14008, P08865, Q13813, O15530, P14625, O75874, Q06124, P50542, O94921, O00459, P55957, P02549
SH2B	SP_PIR_KEYWORDS	sh3 domain	4.581707556428485E-8	Q9NYB9, P42681, Q86WV1, Q9BX66, O75563, O15117, O00459, P02549, Q13813
SH2B	INTERPRO	IPR001452:Src homology-3 domain	1.2832126200225475E-7	Q9NYB9, P42681, Q86WV1, Q9BX66, O75563, O15117, O00459, P02549, Q13813
SH2B	UP_SEQ_FEATURE	domain:SH3	2.77282134381311E-7	Q9NYB9, P42681, Q86WV1, O75563, O15117, O00459, P02549, Q13813
SH2B	GOTERM_MF_FAT	GO:0003779~actin binding	7.635171717662998E-7	Q13045, Q9H4G0, Q15746, Q8WXH0, Q8WZ42, Q9BX66, P63316, P21333, P02549, Q13813
SH2B	SMART	SM00326:SH3	2.147290991353964E-6	Q9NYB9, P42681, Q86WV1, Q9BX66, O75563, O15117, O00459, P02549, Q13813
SH2B	GOTERM_MF_FAT	GO:0008092~cytoskeletal protein binding	3.4123825278795433E-6	Q9NYB9, Q13045, Q9H4G0, Q15746, Q8WXH0, Q8WZ42, Q9BX66, P63316, P21333, P02549, Q13813
SH2B	GOTERM_BP_FAT	GO:0030036~actin cytoskeleton organization	8.751783349313674E-6	Q9NYB9, Q9H4G0, O15530, Q8WZ42, Q9BX66, P27797, P21333, P02549
SH2D1A	SP_PIR_KEYWORDS	cytoplasm	1.8224539611321462E-12	Q92608, Q9NYT0, Q9BX97, P08263, Q9UMZ2, Q9NWF9, Q9HC16, P11586, O60870, P42680, Q8NF91, Q4KWH8, Q6ZMW3, Q9Y4P1, Q96GR2, O43312, O00401, Q8IZT6, Q9UFH2, O60880, P34896, O75369, Q5TCZ1, P50395, Q8IZW8, Q14764, P31150, P60484
SH2D1A	SP_PIR_KEYWORDS	phosphoprotein	2.1958426249568523E-6	Q92608, P20963, Q9NYT0, Q9UMZ2, Q92796, Q9NWF9, P11586, Q8N357, P42680, Q8NF91, Q4KWH8, Q9Y4P1, Q96GR2, O43312, O00401, Q8IZT6, P49848, P51812, P34896, O75369, Q5TCZ1, Q7Z3G6, P78536, P10721, P50395, Q13322, Q8IZW8, Q14764, P31150, P60484, Q86Y07, Q12959
SH2D1A	GOTERM_CC_FAT	GO:0005856~cytoskeleton	2.7566680373186316E-6	Q92608, Q9NYT0, Q8IZT6, Q9UFH2, P06746, O75369, P78536, Q5TCZ1, Q8NF91, Q6ZMW3, Q9Y4P1, Q8IZW8, Q96AC6, O43312, Q12959, O00401
SH2D1A	GOTERM_CC_FAT	GO:0043228~non-membrane-bounded organelle	1.0589807397375904E-4	Q92608, Q8IZT6, Q9NYT0, Q9UFH2, P06746, Q9HC16, O75369, P78536, Q5TCZ1, P10721, Q8NF91, Q6ZMW3, Q9Y4P1, Q8IZW8, Q96AC6, O43312, Q12959, O00401
SH2D1A	GOTERM_CC_FAT	GO:0043232~intracellular non-membrane-bounded organelle	1.0589807397375904E-4	Q92608, Q8IZT6, Q9NYT0, Q9UFH2, P06746, Q9HC16, O75369, P78536, Q5TCZ1, P10721, Q8NF91, Q6ZMW3, Q9Y4P1, Q8IZW8, Q96AC6, O43312, Q12959, O00401
SH2D1A	UP_SEQ_FEATURE	mutagenesis site	2.9858187424298797E-4	O60880, P06746, Q9HC16, P11586, Q5TCZ1, O60870, P10721, Q8NF91, Q9Y4P1, Q13564, Q8IZW8, P60484, Q12959
SH2D1A	SP_PIR_KEYWORDS	host-virus interaction	3.744456116655837E-4	P20963, Q9NWF9, Q9HC16, O60870, Q12959
SH2D1A	GOTERM_BP_FAT	GO:0030036~actin cytoskeleton organization	3.986308046827115E-4	Q92608, Q9NYT0, O43312, O75369, O00401, Q12959
SH2D1A	SP_PIR_KEYWORDS	cytoskeleton	4.1176045984743525E-4	Q92608, Q9NYT0, Q8NF91, Q9UFH2, Q8IZW8, O43312, O75369, O00401
SH2D1A	GOTERM_BP_FAT	GO:0030029~actin filament-based process	5.346402516056498E-4	Q92608, Q9NYT0, O43312, O75369, O00401, Q12959
SH2D2A	SP_PIR_KEYWORDS	phosphoprotein	5.448082647215783E-10	P56715, P27105, P23443, Q02790, P43354, Q8ND61, P30086, Q9ULZ3, O96028, Q03135, Q96PY6, P42681, Q6GYQ0, P58107, Q9H792, P29474, P27708, P52292, Q9GZZ1, P23497, Q9NP31, O43312, Q07157, Q9C0B9, Q86T24, Q96RT1, Q8IX90, Q8WWQ8, Q9BY44, O43281, Q07912, Q6NXT1,
SH2D2A	SP_PIR_KEYWORDS	cytoplasm	7.616614514053415E-7	P27105, P23443, Q02790, P30086, Q9ULZ3, Q86T24, O96028, P42681, Q96PU9, Q9NQ94, Q6GYQ0, P58107, Q8IX90, Q8WWQ8, P29474, P27708, O14830, P52292, Q9GZZ1, Q9NP31, O43312, P04792
SH2D2A	GOTERM_BP_FAT	GO:0009628~response to abiotic stimulus	2.744694391356441E-4	P56715, Q96PY6, P27105, P23443, P29474, P30086, P04792, Q03135
SH2D2A	GOTERM_BP_FAT	GO:0009408~response to heat	3.6710306273949727E-4	P27105, P23443, P29474, P30086, P04792
SH2D2A	GOTERM_CC_FAT	GO:0005625~soluble fraction	4.419542283821609E-4	P27105, P23443, P29474, P30086, Q9NP31, P04792, Q03135
SH2D2A	GOTERM_BP_FAT	GO:0006796~phosphate metabolic process	5.042889712448601E-4	Q96PY6, P42681, O95476, Q9H792, P23443, O14830, Q9BY44, P27708, Q07912, P78509
SH2D2A	GOTERM_BP_FAT	GO:0006793~phosphorus metabolic process	5.042889712448601E-4	Q96PY6, P42681, O95476, Q9H792, P23443, O14830, Q9BY44, P27708, Q07912, P78509
SH2D2A	GOTERM_BP_FAT	GO:0010243~response to organic nitrogen	5.196273747906621E-4	P27105, P23443, P29474, P43354, P30086
SH2D2A	GOTERM_BP_FAT	GO:0006468~protein amino acid phosphorylation	0.00115032	Q96PY6, P42681, Q9H792, P23443, Q9BY44, P27708, Q07912, P78509
SH2D2A	GOTERM_BP_FAT	GO:0009266~response to temperature stimulus	0.00116178	P27105, P23443, P29474, P30086, P04792
SHC1	SP_PIR_KEYWORDS	acetylation	4.4077498140306916E-8	P06400, O14745, Q9NRR5, O75643, P27797, Q9UMX0, P31943, O43813, Q9NTJ3, Q8IWA0, Q08378, P55795, P50395, P48147, O75083, P25705, Q9UHD9, Q9P258, P61978, P23396, O43747
SHC1	SP_PIR_KEYWORDS	phosphoprotein	3.454083938060461E-7	O14745, Q14997, Q9UMX0, P31943, Q9NTJ3, Q6T4R5, Q8IWA0, Q08378, Q8NF91, Q02410, O75083, Q08357, Q9P258, O95714, P61978, P23396, P29353, Q9HB21, P06400, Q9NRR5, O15297, O75643, Q15751, O43150, Q86X29, P50395, P55795, Q7KZI7, P25705, Q53EL6, Q7Z6J0, P61966
SHC1	SP_PIR_KEYWORDS	cytoplasm	4.2588661959936663E-7	Q969K4, Q9NRR5, Q15751, P27797, Q9UMX0, O43150, O43813, Q9NTJ3, Q08378, P55795, P50395, Q8NF91, P48147, O75083, Q53EL6, Q9UHD9, Q9P258, P61978, P23396, Q9HB21, P29353, Q7Z6J0
SHC1	INTERPRO	IPR015604:Clathrin adaptor AP1, sigma subunit	1.517779180291399E-5	P56377, Q96PC3, P61966
SHC1	UP_SEQ_FEATURE	repeat:2-1	1.8916526001212184E-5	P55795, P27797, P31943, P61978
SHC1	UP_SEQ_FEATURE	repeat:1-2	2.1352884973805183E-5	P55795, P27797, P31943, P61978
SHC1	SP_PIR_KEYWORDS	golgi apparatus	2.356281121819325E-5	Q08378, P56377, Q15751, O43150, Q9BT67, Q96PC3, O43747, P61966, Q7Z6J0
SHC1	UP_SEQ_FEATURE	repeat:1-1	2.3987157426859637E-5	P55795, P27797, P31943, P61978
SHC1	UP_SEQ_FEATURE	repeat:2-2	2.3987157426859637E-5	P55795, P27797, P31943, P61978
SHC1	GOTERM_CC_FAT	GO:0005794~Golgi apparatus	3.0484946882744733E-5	Q08378, P50395, Q8NF91, P56377, Q15751, O43150, Q9BT67, Q86X29, Q96PC3, O43747, P61966, Q7Z6J0
SHC3	GOTERM_CC_FAT	GO:0005829~cytosol	1.9926035806914707E-15	P09467, P60709, Q9ULZ3, Q9HC96, P43403, P48147, P29474, O75083, Q00535, Q96PC3, P23396, O43747, P54840, P21333, P21108, P35579, P23921, P62314, P60891, Q14204, P56377, Q9NSD9, P63261, Q10567, Q99570, P61966
SHC3	SP_PIR_KEYWORDS	acetylation	1.1698326955328418E-12	P62736, P09467, P34932, P60709, O95831, Q9NZT2, P43403, P48147, O75083, P68032, Q00535, Q9P258, O75381, P23396, O43747, P21333, P21108, P35579, P23921, P60891, Q14204, Q9NSD9, P63261, P68133, Q10567, P63267
SHC3	GOTERM_MF_FAT	GO:0030554~adenyl nucleotide binding	1.9263070877255604E-10	P62736, P34932, P60709, P21108, P35579, P40145, O95831, Q9NRM7, P23921, Q14204, P60891, P43403, P29474, Q9NSD9, P43405, P29475, P63261, P68032, Q00535, P68133, P63267, Q99570
SHC3	GOTERM_MF_FAT	GO:0001883~purine nucleoside binding	2.56252763963305E-10	P62736, P34932, P60709, P21108, P35579, P40145, O95831, Q9NRM7, P23921, Q14204, P60891, P43403, P29474, Q9NSD9, P43405, P29475, P63261, P68032, Q00535, P68133, P63267, Q99570
SHC3	INTERPRO	IPR004001:Actin, conserved site	2.6383787193883506E-10	P62736, P68032, P63261, P68133, P60709, P63267
SHC3	GOTERM_MF_FAT	GO:0001882~nucleoside binding	2.91587708542236E-10	P62736, P34932, P60709, P21108, P35579, P40145, O95831, Q9NRM7, P23921, Q14204, P60891, P43403, P29474, Q9NSD9, P43405, P29475, P63261, P68032, Q00535, P68133, P63267, Q99570
SHC3	SP_PIR_KEYWORDS	atp-binding	3.142277008307662E-10	P62736, P34932, P60709, P21108, P35579, Q9NRM7, P40145, P23921, Q14204, P60891, P43403, Q9NSD9, P43405, P68032, P63261, Q00535, P68133, P63267, Q99570
SHC3	SP_PIR_KEYWORDS	methylated amino acid	4.5470832748594524E-10	P62736, P68032, P63261, P68133, P60709, P63267
SHC3	GOTERM_MF_FAT	GO:0017076~purine nucleotide binding	9.67205463404108E-10	P62736, P34932, P60709, P21108, P35579, P40145, O95831, Q9NRM7, P23921, Q14204, P60891, P43403, P29474, Q9NSD9, P43405, P29475, P63261, P68032, Q00535, P68133, Q9BZ29, P63267, Q99570
SHC3	PIR_SUPERFAMILY	PIRSF002337:Actin	2.6328304003709103E-9	P62736, P68032, P63261, P68133, P60709, P63267
SRC	SP_PIR_KEYWORDS	phosphoprotein	1.914842996802239E-10	P46940, Q9NPI6, P25788, Q8IY51, P12931, P07951, P14866, O43823, P85037, P16157, Q5T7W0, Q13017, Q9Y4K4, P09104, P04264, P27695, O43520, Q9Y3M8, Q9Y6D9, Q96ST3, Q6EMB2, Q8N4C8, Q99704, O60281, P20042, Q9H4X1, Q9NZ63, P08729, O43296, P06753, Q9Y666, P54105,
SRC	SP_PIR_KEYWORDS	acetylation	3.0034324069574713E-9	P46940, P27695, P25788, Q9Y6D9, Q96ST3, P07951, P14866, O43823, P85037, Q5T7W0, Q99704, O60281, P63173, P20042, P09493, P08729, P06753, P60891, P54105, P67936, Q13423, Q14562, O00232
SRC	INTERPRO	IPR000533:Tropomyosin	5.1212437576102484E-8	P09493, P06753, P07951, P67936
SRC	GOTERM_CC_FAT	GO:0005865~striated muscle thin filament	7.074977210251968E-8	P20929, P09493, P06753, P07951, P67936
SRC	PIR_SUPERFAMILY	PIRSF002327:tropomyosin	7.878700409160443E-8	P09493, P06753, P07951, P67936
SRC	GOTERM_CC_FAT	GO:0005862~muscle thin filament tropomyosin	8.19168052881167E-8	P09493, P06753, P07951, P67936
SRC	SP_PIR_KEYWORDS	cytoskeleton	8.229317928238737E-7	Q9H4X1, P20929, P09493, Q9Y6D9, Q6EMB2, P06753, P07951, P54105, P16157, P67936, Q9BZV1
SRC	GOTERM_CC_FAT	GO:0005856~cytoskeleton	1.8200488741990163E-6	P46940, P20929, P27695, P25788, Q9Y6D9, Q6EMB2, P07951, P16157, Q9H4X1, P09493, P08729, P06753, P54105, P67936, P04264, Q9BZV1
SRC	GOTERM_CC_FAT	GO:0043228~non-membrane-bounded organelle	3.2772401810236226E-6	P46940, P20929, P27695, P25788, Q9Y6D9, Q8IY51, Q96ST3, Q6EMB2, P07951, P16157, O43823, P85037, P63173, Q9H4X1, P09493, P08729, P06753, P54105, P67936, P04264, Q9BZV1
SRC	GOTERM_CC_FAT	GO:0043232~intracellular non-membrane-bounded organelle	3.2772401810236226E-6	P46940, P20929, P27695, P25788, Q9Y6D9, Q8IY51, Q96ST3, Q6EMB2, P07951, P16157, O43823, P85037, P63173, Q9H4X1, P09493, P08729, P06753, P54105, P67936, P04264, Q9BZV1
TEC	SP_PIR_KEYWORDS	SH2 domain	4.778864321148441E-9	P42680, Q92835, P27986, Q9H788, P15498, Q6S5L8, Q06124, O00459
TEC	SP_PIR_KEYWORDS	phosphoprotein	5.68479414908557E-9	Q9NPI6, P07333, P32927, Q14997, P16157, P08865, Q9NWX6, Q96P31, P42680, Q15056, P27986, Q9UNS2, Q9H792, Q06124, P09104, Q7L591, Q8WU20, Q9UPY3, Q9UJU6, O60242, P19484, P27695, P15924, Q9UQ49, Q8N4C8, Q8N6F7, P52948, P10721, Q92835, Q06481, Q9H788, P15498,
TEC	INTERPRO	IPR000980:SH2 motif	7.490104494506849E-9	P42680, Q92835, P27986, Q9H788, P15498, Q6S5L8, Q06124, O00459
TEC	SMART	SM00252:SH2	3.233440635320703E-8	P42680, Q92835, P27986, Q9H788, P15498, Q6S5L8, Q06124, O00459
TEC	SP_PIR_KEYWORDS	cytoplasm	4.081583404744429E-7	P19484, Q9NPI6, P15924, Q9H467, Q8N6F7, P16157, P08865, Q9NWX6, P42680, Q14032, Q15056, Q92835, Q9H788, Q9UNS2, Q06124, O75161, P09104, Q7L591, P60484, Q9UPY3, Q9BVQ7, Q8N7A1, Q9UJU6
TEC	GOTERM_MF_FAT	GO:0005158~insulin receptor binding	4.6937526406959826E-5	P27986, Q06124, Q8WU20, Q7L591
TEC	UP_SEQ_FEATURE	domain:SH2	6.34692734222268E-5	P42680, Q92835, Q9H788, P15498, Q6S5L8
TEC	GOTERM_CC_FAT	GO:0005829~cytosol	1.775928164657859E-4	O43242, P08865, Q14032, Q15056, P27986, Q92835, P15498, Q06124, P09104, P60484, O00459, P48506, Q9UJU6
TEC	KEGG_PATHWAY	hsa04650:Natural killer cell mediated cytotoxicity	2.0895616988159284E-4	P27986, P43626, P15498, Q6S5L8, Q06124, O00459
TEC	UP_SEQ_FEATURE	domain:SH2 1	2.1995051265494994E-4	P27986, Q06124, O00459
TENC1	SP_PIR_KEYWORDS	phosphoprotein	3.994307898859238E-13	Q9UGI8, P29317, Q58EX7, Q14289, Q15027, Q93052, Q9H4M9, Q63HR2, Q7Z3J3, P22105, Q02763, P61106, P15311, P08631, P51805, O95714, Q13131, Q86UK7, Q92990, Q13153, O60347, Q9NQ75, Q9NUY8, Q9Y5X1, Q8IZP0, P12883, Q96RL7, Q9UPU7, O75900, P26640, Q9Y5W8, Q9UIW2,
TENC1	GOTERM_CC_FAT	GO:0005925~focal adhesion	5.180490454121911E-10	Q9UGI8, Q13153, Q8N556, Q14289, Q9NQ75, P12883, Q93052, Q63HR2
TENC1	GOTERM_CC_FAT	GO:0005924~cell-substrate adherens junction	6.804535493319693E-10	Q9UGI8, Q13153, Q8N556, Q14289, Q9NQ75, P12883, Q93052, Q63HR2
TENC1	GOTERM_CC_FAT	GO:0030055~cell-substrate junction	1.0044612065586235E-9	Q9UGI8, Q13153, Q8N556, Q14289, Q9NQ75, P12883, Q93052, Q63HR2
TENC1	GOTERM_CC_FAT	GO:0005912~adherens junction	9.799511925643813E-9	Q9UGI8, Q13153, Q8N556, Q14289, Q9NQ75, P12883, Q93052, Q63HR2
TENC1	GOTERM_CC_FAT	GO:0070161~anchoring junction	2.0178386607718764E-8	Q9UGI8, Q13153, Q8N556, Q14289, Q9NQ75, P12883, Q93052, Q63HR2
TENC1	GOTERM_CC_FAT	GO:0016323~basolateral plasma membrane	6.325880594105471E-8	Q9UGI8, Q13153, Q8N556, Q14289, Q9NQ75, P12883, Q93052, Q63HR2
TENC1	GOTERM_BP_FAT	GO:0051056~regulation of small GTPase mediated signal transduction	1.2042814597895681E-7	Q008S8, Q58EX7, Q14289, O60347, Q9P2F8, Q15027, Q9NUY8, Q2M2D7, Q9UPU7
TENC1	GOTERM_BP_FAT	GO:0046578~regulation of Ras protein signal transduction	5.960554665661172E-7	Q008S8, Q58EX7, Q14289, O60347, Q15027, Q9NUY8, Q2M2D7, Q9UPU7
TENC1	GOTERM_CC_FAT	GO:0030054~cell junction	2.8540748148255634E-6	Q9UGI8, Q13153, Q8N556, Q14289, Q9NQ75, Q8IZP0, P12883, Q93052, Q63HR2
TNS	SP_PIR_KEYWORDS	cytoplasm	7.083877323029536E-12	P42224, Q9H467, P30520, Q9H6S3, P08865, Q93052, P42681, Q9NQ94, Q9Y4P1, Q9HB21, Q8N7A1, P41279, P05787, Q7Z3T8, P00519, O00507, Q13939, Q93008, Q6PIY7, O75112, O95922, Q14185, P42025, Q5XXA6, Q9HBL0, Q9Y4B6, Q8N4L4, O43602
TNS	SP_PIR_KEYWORDS	nucleotide-binding	2.422558392763188E-9	P41279, Q9Y6G9, Q8N4C8, P30520, Q15029, P00519, Q9NY65, Q6PEY2, Q8N0W3, Q9Y4I1, P10721, Q9H853, P35580, Q02763, P42681, Q6PIY7, Q13748, P09619, P42025
TNS	GOTERM_CC_FAT	GO:0043228~non-membrane-bounded organelle	4.804313974007928E-8	Q9Y6G9, P42224, P05787, P08865, P00519, Q9NY65, Q13939, Q6PEY2, Q9H853, P10721, Q9Y4I1, P35580, Q13748, Q9NQ94, O95922, O75112, Q9Y4P1, P42025, Q9HBL0, P12004, O43602
TNS	GOTERM_CC_FAT	GO:0043232~intracellular non-membrane-bounded organelle	4.804313974007928E-8	Q9Y6G9, P42224, P05787, P08865, P00519, Q9NY65, Q13939, Q6PEY2, Q9H853, P10721, Q9Y4I1, P35580, Q13748, Q9NQ94, O95922, O75112, Q9Y4P1, P42025, Q9HBL0, P12004, O43602
TNS	GOTERM_CC_FAT	GO:0005856~cytoskeleton	9.514777538530449E-8	Q9Y6G9, P05787, P00519, Q13939, Q9NY65, Q6PEY2, Q9Y4I1, Q9H853, P35580, Q13748, O95922, O75112, Q9Y4P1, P42025, Q9HBL0, O43602
TNS	GOTERM_MF_FAT	GO:0032555~purine ribonucleotide binding	3.3521116435694406E-7	P41279, Q9Y6G9, Q8N4C8, P30520, Q15029, P00519, Q9NY65, Q6PEY2, Q8N0W3, Q9Y4I1, P10721, Q9H853, P35580, Q02763, P42681, Q6PIY7, Q13748, P09619, P42025
TNS	GOTERM_MF_FAT	GO:0032553~ribonucleotide binding	3.3521116435694406E-7	P41279, Q9Y6G9, Q8N4C8, P30520, Q15029, P00519, Q9NY65, Q6PEY2, Q8N0W3, Q9Y4I1, P10721, Q9H853, P35580, Q02763, P42681, Q6PIY7, Q13748, P09619, P42025
TNS	GOTERM_MF_FAT	GO:0017076~purine nucleotide binding	6.527161870020662E-7	P41279, Q9Y6G9, Q8N4C8, P30520, Q15029, P00519, Q9NY65, Q6PEY2, Q8N0W3, Q9Y4I1, P10721, Q9H853, P35580, Q02763, P42681, Q6PIY7, Q13748, P09619, P42025
TNS	GOTERM_CC_FAT	GO:0044430~cytoskeletal part	6.687087604991843E-7	Q9Y6G9, P05787, Q13939, Q9NY65, Q6PEY2, Q9Y4I1, Q9H853, P35580, Q13748, O95922, Q9Y4P1, P42025, O43602
TNS	INTERPRO	IPR002452:Alpha tubulin	1.0665337350874466E-6	Q9H853, Q13748, Q9NY65, Q6PEY2
TXK	SP_PIR_KEYWORDS	phosphoprotein	4.739856170910959E-11	Q9NPI6, P07333, P32927, O94875, P08581, P18433, P08865, Q5KSL6, Q96PK6, P42681, P53350, Q16644, O15530, Q9H792, Q00610, Q7L591, Q9GZQ6, P78332, P41279, P19484, P98196, Q96ST3, Q9UQ49, Q96S55, P15941, Q96RT1, Q93008, Q9NT99, P54764, Q14204, Q99638, Q53GS9,
TXK	SP_PIR_KEYWORDS	atp-binding	1.02795081487398E-7	P41279, P98196, P07333, P08581, Q96S55, Q5KSL6, P42681, P54764, P53350, Q16644, O15530, Q9H792, Q14204, Q9BVQ7, Q05513
TXK	UP_SEQ_FEATURE	domain:Protein kinase	2.5874677105391253E-7	P41279, P42681, P54764, P53350, O15530, P07333, Q16644, Q9H792, P08581, Q05513
TXK	UP_SEQ_FEATURE	active site:Proton acceptor	4.315795642385949E-7	P41279, P42681, P54764, P53350, O15530, P07333, Q16644, Q9H792, Q9UQ49, P08581, Q05513
TXK	INTERPRO	IPR017441:Protein kinase, ATP binding site	4.926409985516584E-7	P41279, P42681, P54764, P53350, O15530, P07333, Q16644, Q9H792, P08581, Q05513
TXK	SP_PIR_KEYWORDS	kinase	6.125121344680828E-7	Q5KSL6, P41279, P42681, P54764, P53350, O15530, P07333, Q16644, Q9H792, P08581, Q05513
TXK	UP_SEQ_FEATURE	binding site:ATP	8.685537424364193E-7	P41279, P42681, P54764, P53350, O15530, P07333, Q16644, Q9H792, P08581, Q05513
TXK	UP_SEQ_FEATURE	nucleotide phosphate-binding region:ATP	1.7041803031693265E-6	P41279, P42681, P54764, P53350, O15530, P07333, Q16644, Q14204, Q9H792, P08581, Q96S55, Q05513
TXK	SP_PIR_KEYWORDS	nucleotide-binding	1.9234857041570832E-6	P41279, P98196, P07333, P08581, Q96S55, Q5KSL6, P42681, P54764, P53350, Q16644, O15530, Q9H792, Q14204, Q9BVQ7, Q05513
TXK	GOTERM_BP_FAT	GO:0006468~protein amino acid phosphorylation	3.5438991260689363E-6	P41279, P42681, P54764, P53350, O15530, P07333, Q16644, Q9H792, P08581, P18433, Q05513
VAV1	SP_PIR_KEYWORDS	phosphoprotein	8.726424721613766E-14	Q9NYB9, Q9UJX5, P08581, Q9UP95, P31946, O15013, P08865, Q96P31, Q0JRZ9, O14964, O60678, P53621, O15530, P14625, P11217, P55011, O75083, Q8WU20, Q5TB80, Q96LC7, O75665, Q9C0B5, Q8N4C8, Q8N6F7, P34903, P00519, P52948, Q8IZD4, P10721, P15498, P33527, Q9Y666,
VAV1	GOTERM_CC_FAT	GO:0005829~cytosol	2.65740775548672E-7	Q9NYB9, O75665, Q9UJX5, Q99836, P31946, P00519, P08865, O14964, O60678, P53621, O15530, P14625, P15498, Q9Y2U5, O15371, O75083, P02549
VAV1	INTERPRO	IPR004842:Na/K/Cl co-transporter superfamily	3.8084438995090174E-7	Q9Y666, P55011, Q9UP95, Q9UHW9
VAV1	GOTERM_MF_FAT	GO:0015377~cation:chloride symporter activity	9.958773373230875E-7	Q9Y666, P55011, Q9UP95, Q9UHW9
VAV1	SP_PIR_KEYWORDS	cytoplasm	5.729887925984685E-6	Q9NYB9, O75665, Q99836, Q8N6F7, P31946, P08865, P00519, O14964, Q8IZD4, O60678, P53621, O15530, Q9Y2U5, O15371, Q86TB9, Q8WVM8, O75083, Q14185, O75161, Q5TB80, P02549
VAV1	GOTERM_BP_FAT	GO:0006884~cell volume homeostasis	6.7151654097647385E-6	Q9Y666, P55011, Q9UP95, Q9UHW9
VAV1	INTERPRO	IPR004841:Amino acid permease-associated region	1.6365597780072753E-5	Q9Y666, P55011, Q9UP95, Q9UHW9
VAV1	GOTERM_BP_FAT	GO:0006821~chloride transport	2.2106343144710808E-5	Q9Y666, P55011, Q9UP95, P34903, Q9UHW9
VAV1	INTERPRO	IPR000076:K-Cl co-transporter	3.0311852120242797E-5	Q9Y666, Q9UP95, Q9UHW9
VAV1	GOTERM_MF_FAT	GO:0015379~potassium:chloride symporter activity	4.221903900977545E-5	Q9Y666, Q9UP95, Q9UHW9
VAV2	SP_PIR_KEYWORDS	phosphoprotein	6.653174241973726E-7	Q8NF50, Q13574, P17174, O14920, Q02790, Q9UDY4, P31946, O76081, Q15303, O43264, P55196, Q02224, A5YKK6, O95644, O43157, Q9GZQ6, Q14980, Q9BZ29, Q9HB21, P35749, P98196, Q9Y490, P31321, Q9Y6N7, P52735, P34982, P52948, P35579, P18031, O15229, O75044, P10721,
VAV2	GOTERM_CC_FAT	GO:0005829~cytosol	2.073629639898063E-6	Q9NR45, Q9Y490, P18054, P31321, P17174, O14920, P52735, P31946, P35579, P18031, O15229, P55196, P26640, Q14204, Q9Y6K8, O43747, Q14980
VAV2	SP_PIR_KEYWORDS	membrane	2.2852954157135994E-4	Q13574, O14920, Q9UDY4, O76081, Q15303, Q9HC58, O43264, P47211, Q6PRD1, O43157, P48995, Q9GZQ6, O43747, Q9HB21, Q9BZ29, P98196, Q9Y490, Q9Y6N7, P16410, P34982, O14939, P52948, P18031, O15229, P10721, Q9ULB5, Q8TDM6, Q9UPX0
VAV2	GOTERM_BP_FAT	GO:0006928~cell motion	5.846274508659951E-4	P10721, Q9Y490, P18054, O43157, Q9Y6N7, P52735, P34982, P35579
VAV2	GOTERM_MF_FAT	GO:0017076~purine nucleotide binding	6.256671575254694E-4	Q8NF50, P98196, Q13574, P31321, O14920, Q02790, Q15303, P35579, O15229, P26640, P10721, Q02224, Q14204, Q9Y6K8, Q9BZ29, P35749
VAV2	SP_PIR_KEYWORDS	polymorphism	9.036200001694025E-4	Q9NR45, Q8NF50, Q13574, O14920, Q02790, Q15303, Q9HC58, O43264, P47211, Q02224, A5YKK6, Q6PRD1, O95644, O43157, Q9GZQ6, Q9Y6K8, Q14980, O43747, Q9BZ29, Q9HB21, P35749, P98196, Q9Y490, P18054, Q9Y6N7, P16410, P52735, P34982, P52948, O14939, P35579, P18031,
VAV2	SP_PIR_KEYWORDS	atp-binding	9.70172272716177E-4	P26640, P10721, Q02224, P98196, Q14204, Q13574, O14920, Q15303, Q9Y6K8, P35749, P35579
VAV2	GOTERM_MF_FAT	GO:0030554~adenyl nucleotide binding	0.00101199	P98196, Q13574, P31321, O14920, Q02790, Q15303, P35579, O15229, P26640, P10721, Q02224, Q14204, Q9Y6K8, P35749
VAV2	GOTERM_MF_FAT	GO:0001883~purine nucleoside binding	0.00116674	P98196, Q13574, P31321, O14920, Q02790, Q15303, P35579, O15229, P26640, P10721, Q02224, Q14204, Q9Y6K8, P35749
VAV2	GOTERM_MF_FAT	GO:0001882~nucleoside binding	0.00124411	P98196, Q13574, P31321, O14920, Q02790, Q15303, P35579, O15229, P26640, P10721, Q02224, Q14204, Q9Y6K8, P35749
YES1	SP_PIR_KEYWORDS	phosphoprotein	4.739856170910959E-11	Q9NPI6, P29317, Q04695, P28290, Q96EA4, P43034, Q96PY6, P49795, O75674, P42681, P61106, Q16828, Q6ZV73, Q8NF91, Q8TCS8, Q9GZZ1, P17661, Q9Y3A5, P07947, P27695, Q9Y3M8, Q9Y6D9, Q13501, O43150, P27448, Q92736, Q02241, P35900, P54764, P09211, P35908, Q7KZI7,
YES1	SP_PIR_KEYWORDS	cytoplasm	3.0059301936302492E-9	Q86XP0, Q9NPI6, Q9Y3M8, Q04695, Q9Y6D9, P28290, Q96EA4, Q13501, Q96RK4, P43034, O43150, Q02241, P35900, P42681, Q16828, Q6ZV73, Q8NF91, Q9BSK4, P02533, Q9GZZ1, P17661, Q9Y3A5, P07947, P04792
YES1	GOTERM_CC_FAT	GO:0044430~cytoskeletal part	1.017447690590541E-6	P27695, Q9Y6D9, Q04695, Q96EA4, Q96RK4, P43034, Q02241, P35900, P02533, P35908, Q9Y3A5, P17661, P04792
YES1	GOTERM_CC_FAT	GO:0005856~cytoskeleton	1.2415443630237084E-6	P27695, Q9Y6D9, Q04695, Q96EA4, Q96RK4, P43034, Q02241, P35900, Q6ZV73, Q8NF91, P02533, P35908, P17661, Q9Y3A5, P04792
YES1	UP_SEQ_FEATURE	region of interest:Linker 12	7.746548142688039E-6	P35900, Q04695, P02533, P35908, P17661
YES1	UP_SEQ_FEATURE	region of interest:Coil 1B	1.1083812325685071E-5	P35900, Q04695, P02533, P35908, P17661
YES1	UP_SEQ_FEATURE	region of interest:Linker 1	1.1083812325685071E-5	P35900, Q04695, P02533, P35908, P17661
YES1	UP_SEQ_FEATURE	region of interest:Coil 1A	1.1083812325685071E-5	P35900, Q04695, P02533, P35908, P17661
YES1	UP_SEQ_FEATURE	region of interest:Rod	1.172883214929365E-5	P35900, Q04695, P02533, P35908, P17661
YES1	UP_SEQ_FEATURE	region of interest:Head	1.3101356979019853E-5	P35900, Q04695, P02533, P35908, P17661
